# Supplementary material for: Concurrent anemia and stunting among schoolchildren in Wonago district in southern Ethiopia: a cross-sectional multilevel analysis
Source: PeerJ. 2021 May 6;9:e11158. doi: 10.7717/peerj.11158 (PMC8106909; doi:10.7717/peerj.11158)
Supplement: Supplemental Information 2 [file peerj-09-11158-s002.docx]

**Table S1 Demographic and socio-economic characteristics of schoolchildren and their parents in the Wonago district of southern Ethiopia, 2017 (n=861)**

| **Variables** | | **Frequency** | **Percent** |
| --- | --- | --- | --- |
| Sex | Boys | 483 | 56.1 |
| Girls | 378 | 43.9 |
| Child age group | 7-9 | 158 | 18.4 |
| 10-14 | 703 | 81.6 |
| Child lives with whom | Father and mother | 768 | 89.2 |
| Father | 12 | 1.4 |
| Mother | 48 | 5.6 |
| Relatives | 27 | 3.1 |
| Guardian | 6 | 0.7 |
| Household head sex | Male | 787 | 91.4 |
| Female | 74 | 8.6 |
| Family size | 1-4 | 78 | 9.1 |
| ≥5 | 783 | 90.9 |
| Mother’s education | No formal education | 761 | 88.4 |
| Primary | 83 | 9.6 |
| Secondary and above | 13 | 1.5 |
| Mother or guardian not alive | 4 | 0.5 |
| Mother’s occupation | Government employee | 8 | 0.9 |
| Farmer | 287 | 33.5 |
| Trader | 61 | 7.1 |
| Daily labourer | 32 | 3.7 |
| Housewife | 463 | 54.0 |
| Student | 6 | 0.7 |
| Father’s education | No formal education | 420 | 48.8 |
| Primary | 294 | 34.1 |
| Secondary and above | 86 | 10 |
| Father or guardian not alive | 61 | 7.1 |
| Father’s occupation | Government employee | 44 | 5.5 |
| Farmer | 619 | 77.4 |
| Trader | 126 | 15.7 |
| Daily labourer | 11 | 1.4 |
| Wealth status | Poor | 287 | 33.3 |
| Middle-class | 297 | 34.5 |
| Rich | 277 | 32.2 |
