# Supplementary material for: Concurrent anemia and stunting among schoolchildren in Wonago district in southern Ethiopia: a cross-sectional multilevel analysis
Source: PeerJ. 2021 May 6;9:e11158. doi: 10.7717/peerj.11158 (PMC8106909; doi:10.7717/peerj.11158)
Supplement: Supplemental Information 12 [file peerj-09-11158-s012.xlsx]

## Sheet: S1 Dataset
Child ID	School	Grade	Household head sex (1=male, 2=female)	Family size	Child sex (1=boys, 2=girls)	Child age in years	Age group (1=7-9 years, 2=10-14 years)	Trim nail every week (1=yes, 2=no)	Handwashing with saop after latrine (1=always, 2=sometimes,3=never)	Walking barefoot	Reported illness in the past month (1=yes, 2=no)	Regular meals before school (1=yes, 2=no)	Reason for missing meal (1=food in the household is not enough, 3= no time for preparing food )	Received de-worming treatment in the past 6 months (1=yes, 2=no)	Father or guardian age	Mother or guardian age	Mother education	Fathers education	Electricity (1=yes, 0=no)	Radio (1=yes, 0=no)	Television (1=yes, 0=no)	Mobile phone (1=yes, 0=no)	Table (1=yes, 0=no)	Chair (1=yes, 0=no)	Bed (1=yes, 0=no)	Separete room for kitchen (1=yes, 0=no)	Cooking place (1=yes, 0=no)	Own land (1=yes, 0=no)	Bank account (1=yes, 0=no)	Toilet facility (1=yes, 0=no)	Foor material (1=yes, 0=no)	Roof material (1=yes, 0=no)	FAC1_1	RFAC1_1	Wealthindex (1=poor, 2=midde class, 3=rich)	Using treated drinking water	Household received food aid in the past 6 months	Weight (Kg)	Height (Cm)	WAZ	Underweight category (0=normal, 1=underweight, 2=severe underweight)	HAZ	Stunting category (1=moderate, 2=severe)	Stunting (1= yes and 0= no)	BAZ	Thinness (1=yes and 0=no)	Haemoglobin (g/dl)	Anaemia (1=yes and 0=no)	Anaemia and stunting (CAS) (1=yes, 0=no)
1	1	1	1	5	1	9	1	2	2	3	2	2	1	2	35	26	1	2	1	1	0	0	1	1	0	1	1	1	0	0	0	1	0.927504	671	3	2	0	20	116.5	-2.49	1	-2.67	1	1	-0.91	0	12.5	0	0
2	1	1	1	5	1	9	1	2	2	2	2	1		2	40	35	1	2	1	1	0	1	1	1	0	1	1	1	1	0	0	1	0.449589	449	2	1	0	19.8	122.5	-2.58	1	-1.67		0	-2.3	1	10.9	1	0
3	1	1	1	12	2	9	1	2	2	3	2	1		2	50	40	1	1	1	0	0	0	1	0	0	1	1	1	0	0	0	1	0.979686	732	3	2	0	26.8	131.5	-0.31	0	-0.16		0	-0.33	0	11.9	0	0
4	1	1	1	5	2	9	1	1	1	2	2	1		2	35	28	2	2	1	1	0	0	1	0	0	1	1	0	1	0	0	1	0.678073	556	2	2	0	25.1	125	-0.72	0	-1.23		0	-0.02	0	12.1	0	0
5	1	1	1	9	2	7	1	1	1	2	2	1		2	30	25	1	2	1	0	0	1	0	1	0	0	0	0	0	1	0	0	-1.45372	87	1	2	0	20	122.1	-0.74	0	0.24		0	-1.4	0	13.2	0	0
6	1	1	1	7	2	9	1	1	1	2	2	1		2	33	48	1	2	1	1	0	0	1	1	0	1	1	1	1	0	0	1	0.744078	586	3	2	0	28.3	132.6	0.02	0	0.02		0	0	0	14.7	0	0
7	1	1	1	8	2	9	1	2	3	2	2	1		2	35	42	1	2	1	1	0	1	1	0	0	1	1	1	0	1	0	1	0.759851	600	3	2	0	26.8	134.7	-0.31	0	0.36		0	-0.78	0	12.3	0	0
8	1	1	1	7	2	8	1	2	2	2	2	1		2	30	25	1	2	1	1	0	1	1	1	0	0	0	1	0	0	0	0	-1.50145	51	1	2	0	26.4	125.4	0.33	0	-0.2		0	0.58	0	14.3	0	0
9	1	1	1	9	1	7	1	1	2	2	2	1		2	41	35	1	2	1	0	0	0	1	1	0	1	1	1	0	1	0	1	1.0682	793	3	2	0	23.1	129.8	0.07	0	1.53		0	-1.45	0	13.3	0	0
10	1	1	1	6	2	9	1	2	2	2	2	1		2	33	28	1	2	0	0	0	0	1	0	0	0	0	1	0	0	1	1	-0.178014	322	2	2	0	19.8	119.1	-2.34	1	-2.19	1	1	-1.34	0	10.3	1	1
11	1	1	1	7	1	9	1	2	2	3	2	1		2	39	31	1	2	0	0	0	0	1	0	0	0	0	1	0	0	0	0	-1.18609	180	1	2	0	22	117.5	-1.74	0	-2.51	1	1	-0.07	0	11	1	1
12	1	1	1	7	1	11	2	2	2	3	2	1		2	42	37	1	1	1	1	1	0	1	1	0	1	1	1	0	0	1	1	1.17797	810	3	2	0	21	118			-3.73	2	1	-1.17	0	12.5	0	0
13	1	1	1	5	1	9	1	2	2	3	2	1		2	50	46	1	2	0	0	0	0	1	0	0	1	1	1	0	0	1	1	1.32249	844	3	2	0	23.8	123.4	-1.15	0	-1.52		0	-0.27	0	13.5	0	0
14	1	1	1	8	2	8	1	2	3	3	2	1		2	41	35	1	2	0	0	0	0	1	0	0	1	1	1	0	0	0	1	0.948374	704	3	2	0	25	137.9	-0.01	0	1.96		0	-1.77	0	13.4	0	0
15	1	1	1	9	1	8	1	2	2	2	2	1		2	53	41	1	1	1	0	0	0	1	0	0	1	1	1	0	0	0	1	0.979686	732	3	2	0	21	119	-1.4	0	-1.46		0	-0.65	0	9.1	1	0
16	1	1	1	7	1	12	2	2	2	2	2	1		2	38	32	1	1	1	0	0	0	1	0	0	0	0	1	0	0	0	0	-1.15478	247	1	2	0	24.2	125.5			-3.33	2	1	-1.29	0	13.5	0	0
17	1	1	1	7	2	7	1	1	2	3	2	1		2	39	34	1	1	0	0	0	0	1	0	0	0	0	1	0	0	0	0	-1.18609	180	1	2	0	21.8	120.7	-0.17	0	-0.02		0	-0.27	0	12.8	0	0
18	1	1	1	6	2	12	2	1	2	3	2	1		2	33	29	2	2	0	0	0	0	1	0	0	0	0	1	0	0	0	0	-1.18609	180	1	2	0	25.8	128.1			-3.38	2	1	-1.13	0	15.2	0	0
19	1	1	1	5	1	8	1	2	2	2	2	1		2	35	30	1	1	0	0	0	0	1	1	0	0	0	0	0	1	0	1	-0.548784	303	2	2	0	19.6	120.4	-1.95	0	-1.22		0	-1.78	0	11.2	1	0
20	1	1	1	7	2	7	1	2	3	3	1	2	1	2	32	28	1	2	1	1	0	1	0	1	1	1	1	1	0	0	0	1	0.327862	399	2	1	0	22.3	125.2	-0.02	0	0.8		0	-0.78	0	9.4	1	0
21	1	1	1	9	2	9	1	1	2	2	2	1		2	40	35	1	2	1	0	0	0	1	0	0	1	1	1	0	0	0	1	0.979686	732	3	2	0	21.3	124.6	-1.82	0	-1.29		0	-1.52	0	14.3	0	0
22	1	1	1	5	2	11	2	2	2	3	2	1		2	50	43	1	1	1	0	0	0	1	0	0	1	1	1	0	0	0	1	0.979686	732	3	2	0	19.8	116.9			-4.23	2	1	-1.56	0	13.3	0	0
23	1	1	1	8	2	7	1	2	2	3	2	1		2	41	35	1	2	1	1	0	0	1	1	0	1	1	1	0	1	0	1	1.03518	780	3	2	0	18.6	116	-1.25	0	-0.88		0	-1.08	0	14.3	0	0
24	1	1	1	10	2	10	2	2	2	3	2	2	1	2		38	1		1	1	0	0	1	0	0	1	1	1	0	0	0	1	0.946667	693	3	1	0	25	126.3	-1.51	0	-1.93		0	-0.49	0
25	1	1	1	7	1	7	1	2	2	2	2	1		2	31	26	2	2	1	0	0	1	1	0	0	0	0	0	1	0	0	0	-1.71786	17	1	1	0	22.6	123.5	-0.09	0	0.33		0	-0.5	0	9.5	1	0
26	1	1	1	8	1	7	1	2	2	2	2	1		2	35	41	1	2	0	1	0	0	1	1	0	1	1	1	0	0	0	1	0.896192	663	3	2	0	18.9	115.6	-1.45	0	-1.16		0	-1.06	0	10.5	1	0
27	1	1	1	10	2	9	1	1	2	3	2	2	1	2	51	44	1	2	0	0	0	0	1	0	0	1	1	1	0	1	0	1	1.05605	789	3	2	0	28.2	130.7	0	0	-0.29		0	0.21	0
28	1	1	1	7	1	11	2	2	2	2	2	1		2	40	34	1	1	1	1	1	1	1	1	0	1	1	1	0	0	1	1	0.88348	658	3	2	0	22.8	121.4			-3.23	2	1	-0.89	0	12.5	0	0
29	1	1	1	5	2	8	1	1	1	2	2	1		2	44	39	1	2	0	0	0	0	1	0	0	0	0	1	0	0	0	0	-1.18609	180	1	2	0	20.4	117.2	-1.34	0	-1.61		0	-0.5	0	12.9	0	0
30	1	1	1	10	2	9	1	2	2	2	2	1		2	48	33	2	2	1	1	1	1	1	1	0	1	1	1	0	0	1	1	0.88348	658	3	2	0	26.1	134.5	-0.47	0	0.33		0	-1	0	14.5	0	0
31	1	1	1	10	2	9	1	2	2	3	2	1		2	38	32	1	2	1	1	0	0	1	0	0	1	1	1	0	0	1	1	1.32078	831	3	2	0	22.5	123.2	-1.44	0	-1.52		0	-0.74	0	14	0	0
32	1	1	1	9	2	9	1	2	2	3	2	1		2	40	53	1	2	1	1	0	1	1	1	0	1	1	1	1	0	0	1	0.449589	449	2	2	0	22.1	131.2	-1.56	0	-0.21		0	-2.27	1	10	1	0
33	1	1	1	5	1	9	1	2	2	2	2	1		2	36	30	1	1	0	0	0	0	1	0	0	0	0	1	0	0	0	0	-1.18609	180	1	2	0	28.7	118.7	0.14	0	-2.31	1	1	1.97	0	13.8	0	0
34	1	1	1	8	1	9	1	2	2	3	2	1		2	48	35	1	2	1	1	0	0	1	1	0	1	1	1	1	0	0	1	0.744078	586	3	2	0	29.1	134.9	0.22	0	0.39		0	-0.04	0	12.3	0	0
35	1	1	1	8	2	9	1	2	2	3	2	1		2	52	47	1	2	1	1	0	0	1	1	0	1	1	0	0	0	1	1	1.21645	813	3	2	0	24.6	119.9	-0.85		-2.06	1	1	0.5	0	10.7	1	1
36	1	1	2	3	2	8	1	2	2	2	2	1		2	30	23	2	2	1	0	0	0	1	1	0	1	1	1	0	0	1	1	1.33464	849	3	2	0	21	125	-1.14	0	-0.27		0	-1.52	0	10	1	0
37	1	2	1	9	1	9	1	2	2	3	2	1		2	35	25	1	1	0	0	0	1	1	0	0	0	0	1	0	0	0	0	-1.48058	71	1	2	0	18.7	117	-3.05	2	-2.59	1	1	-1.84	0	10	1	1
38	1	2	1	9	1	8	1	2	2	3	2	1		2	40	30	1	2	1	1	0	1	1	1	0	1	1	1	1	0	0	1	0.449589	449	2	2	0	21	121	-1.4	0	-1.11		0	-1.04	0	10.7	1	0
39	1	2	1	6	1	8	1	2	2	3	2	1		2	30	21	2	2	1	0	0	1	1	0	0	0	0	1	1	0	0	0	-1.63269	28	1	2	0	23.2	125	-0.65	0	-0.4		0	-0.64	0
40	1	2	1	9	1	9	1	1	2	3	2	1		2		55	1		0	0	0	0	1	0	0	0	0	0	0	0	0	0	-1.27126	115	1	2	0	21.8	127.2	-1.81	0	-0.89		0	-2.02	1	12.4	0	0
41	1	2	1	5	1	10	2	2	2	2	2	1		2	30	25	1	1	0	0	0	0	1	0	0	0	0	0	0	0	0	0	-1.27126	115	1	2	0	23.3	126.4	-1.97	0	-1.79		0	-1.26	0	12.8	0	0
42	1	2	1	7	1	12	2	1	2	3	2	2	1	2	38	25	1	2	0	0	0	0	1	0	0	0	0	1	0	0	0	0	-1.18609	180	1	2	0	36.5	155.7			0.93		0	-1.52	0	15.9	0	0
43	1	2	1	6	2	9	1	2	3	2	2	1		2	42	30	1	2	1	1	0	0	1	1	0	1	1	1	1	0	0	1	0.744078	586	3	2	0	26.3	133.2	-0.43	0	0.12		0	-0.74	0	12	0	0
44	1	2	1	6	1	13	2	1	1	3	1	1		2	38	31	1	1	0	0	0	0	1	0	0	0	0	1	0	0	0	0	-1.18609	180	1	2	0	28.8	139.7			-2.2	1	1	-2.14	1	12.6	0	0
45	1	2	1	9	2	14	2	2	2	3	2	1		2	53	44	1	1	1	1	1	0	1	1	0	1	1	1	0	0	1	1	1.17797	810	3	2	0	28	134.6			-3.63	2	1	-2	0	11.5	1	1
46	1	2	2	5	2	8	1	1	2	2	2	1		2		25	2		0	0	0	1	1	1	0	0	0	0	0	0	0	0	-1.58491	32	1	2	1	18.1	113.7	-2.2	1	-2.22	1	1	-1.09	0	13.8	0	0
47	1	2	1	10	2	8	1	2	2	2	2	1		2	47	40	1	2	1	1	0	1	1	0	0	1	1	1	0	0	1	1	1.02629	768	3	2	0	16.7	111.7	-2.81	1	-2.56	1	1	-1.57	0	12.6	0	0
48	1	2	1	8	1	14	2	2	2	2	2	1		2	45	35	1	2	1	1	0	1	1	0	0	0	0	1	0	0	0	0	-1.48229	63	1	2	0	26.3	133			-3.92	2	1	-2.47	1	14	0	0
49	1	2	1	6	1	8	1	1	2	2	2	1		2	34	30	1	1	1	0	0	0	0	0	0	1	1	1	0	0	1	1	1.34601	852	3	2	0	18.7	111.4	-2.33	1	-2.81	1	1	-0.47	0	13	0	0
50	1	2	1	6	2	10	2	1	2	3	2	1		2	60	38	2	2	1	1	0	1	1	1	0	1	1	1	1	0	0	1	0.449589	449	2	2	0	24.3	129.1	-1.7	0	-1.49		0	-1.17	0	13.1	0	0
51	1	2	1	4	1	11	2	1	2	3	2	1		2	32	25	1	1	1	0	0	0	1	0	0	0	0	1	0	0	0	0	-1.15478	247	1	2	0	21	123.6			-2.9	1	1	-2.29	1	11.5	0	0
52	1	2	1	7	2	10	2	2	2	3	2	1		2	41	30	1	2	1	1	0	0	1	1	0	1	1	1	1	0	0	1	0.744078	586	3	2	0	24.1	127.3	-1.76	0	-1.77		0	-0.98	0	11.2	1	0
53	1	2	1	7	2	12	2	2	2	3	2	1		2	40	33	1	1	1	1	0	0	1	0	0	0	0	1	0	0	0	0	-1.1878	172	1	2	0	29	132.8			-2.69	1	1	-0.73	0	12.7	0	0
54	1	2	1	7	2	10	2	2	2	3	2	1		2	40	32	1	1	1	1	0	1	1	0	0	0	0	1	0	0	0	0	-1.48229	63	1	1	0	28.8	137.5	-0.6	0	-0.18		0	-0.75	0	14.8	0	0
55	1	2	1	6	1	10	2	2	2	3	2	1		2	43	35	1	2	1	1	0	0	1	1	0	1	1	1	1	0	0	1	0.744078	586	3	2	0	21.3	125.5	-2.66	1	-1.93		0	-2.2	1	11.4	1	0
56	1	2	1	7	2	10	2	2	2	3	2	1		2	43	33	1	2	1	1	0	0	1	0	0	1	1	1	1	0	0	1	0.763241	601	3	2	0	22.4	127.4	-2.27	1	-1.76		0	-1.74	0	10.1	1	0
57	1	2	1	8	1	10	2	2	2	3	2	1		2	50	40	1	2	0	0	0	0	1	1	0	1	1	1	0	1	0	1	1.03688	784	3	2	0	22.6	116.2	-2.2	1	-3.39	2	1	0.17	0	12.6	0	0
58	1	2	1	14	2	10	2	2	1	3	2	1		2	53	44	1	2	1	0	0	0	1	0	0	1	1	1	0	0	1	1	1.3538	853	3	2	0	32	140.1	0.03	0	0.23		0	-0.16	0	11.5	0	0
59	1	2	1	6	2	10	2	2	2	3	2	1		2	36	30	1	1	1	0	0	0	1	0	0	0	0	1	0	0	0	0	-1.15478	247	1	2	0	22	129.5	-2.4	1	-1.43		0	-2.3	1	11	1	0
60	1	2	1	8	2	12	2	2	2	3	2	1		2	48	41	2	2	1	1	1	1	0	1	1	1	1	1	1	0	1	1	0.3949	421	2	1	0	32.3	142.5			-1.28		0	-1.03	0	11.8	1	0
61	1	2	1	6	2	10	2	2	2	2	2	2	1	2	67	40	1	1	1	1	0	0	1	0	0	1	1	1	1	0	0	1	0.763241	601	3	2	0	23.1	123.7	-2.05	1	-2.34	1	1	-0.84	0	13.5	0	0
62	1	2	1	8	2	10	2	2	2	3	2	1		2	35	28	1	2	1	0	0	1	1	0	0	0	0	1	0	0	0	1	-0.815303	278	1	2	0	23.1	122.5	-2.05	1	-2.52	1	1	-0.66	0	13.2	0	0
63	1	2	1	9	1	9	1	2	2	3	2	1		2	50	42	1	2	1	0	0	0	1	1	0	1	1	1	0	0	1	1	1.33464	849	3	2	0	29	131.2	0.2	0	-0.23		0	0.46	0	11	1	0
64	1	2	1	6	1	9	1	2	2	2	2	1		2	28	25	1	2	1	0	0	0	1	1	0	1	1	0	0	0	0	1	0.875356	654	3	1	0	32.4	125.7	0.89	0	-1.14		0	2.01	0	12.2	0	0
65	1	2	1	11	1	8	1	2	2	2	2	1		2	44	37	1	2	1	1	0	0	1	0	0	1	1	1	0	0	1	1	1.32078	831	3	2	0	22.8	126.2	-0.78	0	-0.19		0	-1.07	0	12.5	0	0
66	1	2	1	8	1	13	2	2	2	2	2	1		2	49	36	1	2	1	1	0	0	1	1	0	1	1	0	1	0	0	1	0.658911	547	2	2	1	28.3	123.7			-4.35	2	1	0.12	0	11.3	1	1
67	1	2	1	4	2	10	2	1	2	2	1	1		2	30	25	1	1	1	1	0	0	1	0	0	1	1	1	0	0	1	1	1.32078	831	3	2	0	28.8	130.1	-0.6	0	-1.33		0	0.19	0	12.4	0	0
68	1	2	1	10	1	9	1	1	2	3	2	1		2	45	35	2	2	1	1	0	1	1	1	1	1	1	1	1	0	0	1	0.152227	355	2	1	0	24.8	125.4	-0.86	0	-1.19		0	-0.18	0
69	1	2	1	7	2	9	1	2	2	3	2	1		2	53	28	1	2	1	1	0	0	1	1	0	1	1	1	0	0	0	1	0.927504	671	3	2	0	17	115.5	-3.44	2	-2.78	1	1	-2.36	1	12.5	0	0
70	1	2	1	13	2	12	2	2	2	2	2	2	1	2	58	49	2	2	1	1	0	0	1	1	0	1	1	1	1	0	0	1	0.744078	586	3	2	0	45	149			-0.33		0	0.83	0	16	0	0
71	1	2	1	8	2	9	1	2	2	2	2	1		2	45	30	1	2	1	1	0	0	1	1	0	1	1	1	1	0	0	1	0.744078	586	3	2	0	25	130.6	-0.75	0	-0.31		0	-0.85	0	10.6	1	0
72	1	2	1	9	2	10	2	2	2	3	2	1		2	50	36	1	2	1	1	0	0	1	0	0	1	1	1	0	0	0	1	0.946667	693	3	2	0	29	136.4	-0.56	0	-0.35		0	-0.54	0	12.3	0	0
73	1	3	1	5	1	10	2	2	2	2	2	1		2	30	70	2	1	1	1	0	1	1	1	1	1	0	1	1	1	0	1	-0.486384	309	2	2	0	23.7	120.4	-1.84	0	-2.73	1	1	-0.05	0
74	1	3	2	4	1	12	2	2	2	2	2	1		2		48	1		1	0	1	0	1	1	0	1	1	1	0	0	1	1	1.21099	812	3	2	0	31.8	147.8			-0.18		0	-1.91	0	14.6	0	0
75	1	3	1	5	2	12	2	2	2	2	2	1		2	61	45	1	1	1	1	0	0	1	1	0	1	1	1	1	0	0	1	0.744078	586	3	2	0	28.7	131			-2.96	1	1	-0.59	0	11.5	1	1
76	1	3	1	6	1	10	2	2	2	2	2	1		2	54	35	1	1	1	1	0	0	1	0	0	1	1	0	0	0	1	0	0.601647	499	2	2	0	32.4	144.2	0.24	0	1.01		0	-0.53	0	13.9	0	0
77	1	3	1	8	2	11	2	2	1	2	2	1		2	40	36	2	2	1	0	0	0	1	0	0	1	1	1	0	0	1	1	1.3538	853	3	2	0	31.8	138			-1.05		0	-0.26	0	14.5	0	0
78	1	3	1	6	2	10	2	1	1	2	2	1		2	45	35	2	2	1	1	0	0	1	1	0	1	1	1	1	0	0	1	0.744078	586	3	2	0	30.8	130.5	-0.2	0	-1.27		0	0.65	0	13.5	0	0
79	1	3	1	7	1	12	2	2	2	3	2	2	1	2	41	35	1	2	1	1	1	1	1	1	0	1	1	1	1	1	0	1	0.433614	437	2	1	0	25.4	128.9			-2.85	1	1	-1.35	0	13.2	0	0
80	1	3	1	7	1	10	2	2	2	3	2	1		2	43	32	2	2	1	0	0	0	0	1	0	0	0	1	0	0	1	0	-0.807621	279	1	1	0	36.4	139.2	0.91	0	0.22		0	1.12	0	14.4	0	0
81	1	3	1	7	2	11	2	2	2	3	2	1		2	32	25	1	2	1	1	0	1	0	1	0	0	0	1	0	0	0	0	-1.50924	44	1	1	0	26.3	134.9			-1.52		0	-1.58	0
82	1	3	1	5	1	10	2	2	2	3	2	1		2	50	45	2	1	1	1	0	0	1	0	0	1	1	1	1	0	0	1	0.763241	601	3	2	0	27.8	137.1	-0.73	0	-0.11		0	-1.1	0	11.8	0	0
83	1	3	1	7	1	10	2	2	2	2	2	2	1	2	51	35	1	2	1	1	0	1	1	1	0	1	1	1	1	0	0	1	0.449589	449	2	2	0	37	142.7	0.99	0	0.77		0	0.87	0	13.1	0	0
84	1	3	1	3	1	11	2	2	2	2	2	2	1	2	50			1	0	0	0	1	0	1	0	0	0	1	0	0	0	0	-1.50753	46	1	2	0	38	149.1			0.89		0	0.08	0	14.3	0	0
85	1	3	1	6	2	12	2	2	2	2	2	1		2	42	37	1	1	1	1	0	0	1	0	0	0	0	1	0	0	0	0	-1.1878	172	1	2	0	25.4	131.2			-2.93	1	1	-1.74	0	11.4	1	1
86	1	3	1	7	1	12	2	2	2	2	2	1		2	35	30	2	2	0	0	0	0	1	0	0	0	0	0	0	0	0	1	-0.637294	286	1	2	0	33.4	129.9			-2.71	1	1	0.95	0	13.6	0	0
87	1	3	1	7	2	14	2	2	2	2	2	1		2	35	30	2	2	1	0	0	0	1	1	0	0	0	1	0	0	1	1	-0.165865	323	2	2	0	24.4	129.9			-4.31	2	1	-2.67	1	12.1	0	0
88	1	3	1	7	1	11	2	2	2	2	2	1		2	38	32	2	2	1	0	0	0	1	1	0	1	1	1	0	0	1	1	1.33464	849	3	2	0	21.4	125.7			-2.59	1	1	-2.48	1	12	0	0
89	1	3	1	8	2	10	2	2	2	2	2	1		2	35	43	2	2	1	0	0	0	1	1	0	0	0	1	0	0	0	0	-1.17394	238	1	2	0	33.4	144.7	0.27	0	0.95		0	-0.34	0	16.2	0	0
90	1	3	1	11	2	11	2	2	2	2	2	1		2	50	35	1	2	1	1	0	1	1	1	1	1	1	1	1	1	0	1	0.2599	377	2	1	0	36.1	139.4			-0.84		0	0.55	0	14.7	0	0
91	1	3	1	7	2	10	2	2	2	3	2	1		2	45	30	1	2	1	0	0	0	1	1	0	1	1	1	0	0	0	1	0.960523	713	3	2	0	46.3	154.3	1.94	0	2.45		0	1.14	0
92	1	3	1	7	2	13	2	2	2	3	2	1		2	45	33	1	2	1	1	0	0	1	1	0	1	1	1	1	0	0	1	0.744078	586	3	2	0	36.4	150.7			-0.82		0	-1.32	0	11.6	1	0
93	1	3	1	7	2	14	2	2	2	2	2	1		2	46	40	1	1	1	1	0	0	1	0	0	1	1	1	1	0	1	1	1.13735	804	3	2	0	25.4	131.4			-4.09	2	1	-2.49	1	12.7	0	0
94	1	3	1	10	1	11	2	2	2	2	2	1		2	45	37	1	1	1	1	0	0	1	0	0	0	0	1	0	0	0	0	-1.1878	172	1	2	0	29.4	127.1			-2.38	1	1	0.61	0	12.8	0	0
95	1	3	1	7	1	12	2	1	1	2	2	1		2	40	31	1	2	1	1	0	1	0	1	0	0	0	1	1	0	0	0	-1.69267	20	1	2	0	25.8	132.2			-2.38	1	1	-1.75	0	12.1	0	0
96	1	3	1	7	1	12	2	2	2	2	2	1		2	49	32	1	2	1	0	0	0	1	1	0	1	1	1	1	0	0	1	0.777097	606	3	1	0	45.1	160.4			1.6		0	0	0	16.7	0	0
97	1	3	1	8	2	12	2	2	2	2	2	1		2	49	35	1	2	1	1	0	0	1	1	0	1	1	1	1	0	0	1	0.744078	586	3	2	0	26.8	130.5			-3.03	2	1	-1.12	0	12.9	0	0
98	1	3	1	8	1	12	2	2	2	2	2	2	1	2	46	34	1	2	1	1	0	0	1	1	0	1	1	1	1	0	0	1	0.744078	586	3	2	0	26	130.5			-2.62	1	1	-1.36	0	11.7	1	1
99	1	3	1	6	1	12	2	1	2	2	2	1		2	35	28	1	2	1	0	0	1	1	0	0	1	1	1	0	0	0	1	0.685198	560	2	1	0	31.8	138			-1.56		0	-0.44	0	11.2	1	0
100	1	3	1	7	2	9	1	2	2	2	2	1		2	45	30	1	2	1	1	0	0	1	1	0	1	1	1	1	0	0	1	0.744078	586	3	2	0	27	131.4	-0.26	0	-0.18		0	-0.25	0	14.2	0	0
101	1	3	1	6	1	10	2	1	2	2	2	1		2	43	34	1	2	1	1	0	1	1	0	0	0	0	1	0	0	0	0	-1.48229	63	1	2	0	23.8	131.4	-1.81	0	-1		0	-1.95	0	12.9	0	0
102	1	3	1	8	2	10	2	1	2	2	2	1		1	49	35	1	2	1	0	0	0	1	0	0	0	0	1	0	0	0	0	-1.15478	247	1	2	0	35.9	137	0.67	0	-0.26		0	1.03	0	12.6	0	0
103	1	3	1	6	1	11	2	1	2	2	2	1		2	50	42	1	2	1	1	0	1	1	1	0	1	1	1	0	0	0	1	0.633016	513	2	2	0	32.3	146			0.43		0	-1.11	0	13.2	0	0
104	1	3	1	10	1	10	2	2	2	2	2	1		2	50	42	1	2	1	1	0	0	1	1	0	1	1	1	0	0	0	1	0.927504	671	3	2	0	39.8	147.7	1.38	0	1.56		0	0.9	0	13.4	0	0
105	1	3	1	7	2	12	2	2	2	2	2	1		2	44	31	1	1	1	1	1	0	1	1	0	1	1	1	0	0	0	1	0.803856	613	3	2	0	30.4	139.7			-1.69		0	-1.22	0	9.5	1	0
106	1	3	1	5	2	12	2	1	2	3	2	1		2	36	26	1	1	0	0	0	0	1	0	0	0	0	1	0	0	0	0	-1.18609	180	1	2	0	31	137.5			-2.01	1	1	-0.76	0	15.8	0	0
107	1	3	1	7	1	12	2	2	1	2	2	1		2	46	38	1	2	1	0	0	0	1	0	0	0	0	1	0	0	0	0	-1.15478	247	1	2	0	28.2	127			-3.12	2	1	-0.02	0	14.4	0	0
108	1	3	1	6	1	13	2	2	2	2	2	1		2	32	26	1	2	1	0	0	0	1	0	0	0	0	1	0	0	0	0	-1.15478	247	1	2	0	24.3	127.4			-3.86	2	1	-1.97	0	12.7	0	0
109	1	4	1	6	1	12	2	1	2	3	2	1		2	36	30	2	2	1	1	0	0	1	0	0	1	1	1	1	0	1	1	1.13735	804	3	2	0	29.4	140.7			-1.18		0	-1.68	0	11.5	1	0
110	1	4	1	4	2	10	2	1	2	3	2	1		2	48	28	2	1	1	1	0	1	1	1	0	0	1	1	0	1	1	1	0.360585	410	2	2	0	25.6	145.2	-1.35	0	1.03		0	-3.22	1	10.5	1	0
111	1	4	1	6	2	11	2	1	2	3	2	1		2	42	33	2	2	1	0	0	0	1	0	0	1	1	1	0	0	0	1	0.979686	732	3	2	0	30.1	142.9			-0.31		0	-1.38	0	13.9	0	0
112	1	4	1	7	1	13	2	2	2	3	2	1		2	46	39	1	2	1	1	0	0	1	0	0	1	1	1	0	0	1	1	1.32078	831	3	2	0	22.5	128.1			-3.76	2	1	-3.08	1	11.5	1	1
113	1	4	1	4	1	11	2	2	2	1	2	1		2	35	27	2	2	1	0	0	0	1	1	0	0	0	1	0	0	1	1	-0.165865	323	2	2	0	24.5	131.5			-1.73		0	-1.9	0	14.1	0	0
114	1	4	1	9	1	10	2	2	2	3	2	1		2	42	35	1	1	1	0	0	0	1	0	0	1	1	1	0	0	1	1	1.3538	853	3	2	0	26.1	124.3	-1.15	0	-2.11	1	1	0.25	0	12.5	0	0
115	1	4	1	11	1	12	2	2	2	3	2	1		2	55	35	1	2	0	0	0	1	1	1	0	1	1	1	1	0	1	1	0.82541	632	3	2	0	30	135.4			-1.93		0	-0.64	0	11	1	0
116	1	4	1	8	1	10	2	1	2	3	2	1		2	44	38	2	2	1	1	0	0	1	0	0	1	1	1	0	0	1	1	1.32078	831	3	2	0	23.5	128.5	-1.91	0	-1.46		0	-1.55	0	12	0	0
117	1	4	1	5	2	12	2	2	2	2	2	1		2	45	38	1	2	1	1	0	1	1	0	0	0	0	1	0	0	0	0	-1.48229	63	1	2	0	31.6	146			-0.76		0	-1.7	0	12.5	0	0
118	1	4	1	7	1	13	2	2	2	2	2	1		2	38	27	1	1	1	0	0	0	1	0	0	1	1	1	0	0	0	1	0.979686	732	3	2	0	25.8	127.8			-3.8	2	1	-1.37	0	13.1	0	0
119	1	4	1	8	1	12	2	2	2	2	2	1		2	28	26	2	2	1	1	0	0	1	0	0	0	0	1	0	0	0	0	-1.1878	172	1	2	0	20.2	116.4			-4.61	2	1	-1.63	0	12.1	0	0
120	1	4	1	9	2	14	2	2	2	3	2	1		2	50	35	2	2	1	1	0	1	1	1	0	1	1	1	0	0	1	1	1.00713	753	3	2	0	52.6	151			-1.27		0	1.09	0	12.9	0	0
121	1	4	2	6	2	14	2	2	2	3	2	1		2	40	30	2	2	1	1	0	0	1	0	0	1	1	1	0	0	1	1	1.32078	831	3	2	0	31.2	135.7			-3.47	2	1	-1.15	0	11	1	1
122	1	4	1	8	2	12	2	2	2	2	2	1		2	35	28	1	2	0	0	0	0	1	0	0	0	0	1	0	0	0	0	-1.18609	180	1	2	0	31.3	142.4			-1.29		0	-1.3	0	12.9	0	0
123	1	4	1	8	1	13	2	2	2	3	2	1		2	42	35	1	2	1	0	0	0	1	0	0	1	1	1	0	0	0	1	0.979686	732	3	2	0	28.4	140.3			-2.12	1	1	-2.42	1	12	0	0
124	1	4	1	8	1	12	2	2	2	3	2	1		2	40	37	1	1	1	0	0	0	1	0	0	1	1	1	0	0	0	1	0.979686	732	3	2	0	35	154			0.69		0	-1.75	0	14	0	0
125	1	4	1	7	2	12	2	2	2	2	2	1		2	36	26	1	1	0	0	0	0	1	0	0	0	0	0	0	0	0	0	-1.27126	115	1	2	0	33	145.5			-0.84		0	-1.21	0	13	0	0
126	1	4	1	7	1	13	2	1	2	2	2	1		2	39	33	2	2	0	0	0	0	1	0	0	1	1	1	0	0	0	1	0.948374	704	3	2	0	26.8	128.6			-3.69	2	1	-1.1	0	12.2	0	0
127	1	4	1	7	1	11	2	2	2	2	2	1		2	45	38	1	1	0	0	0	0	1	0	0	0	0	0	0	0	0	0	-1.27126	115	1	2	0	24	133.4			-1.44		0	-2.54	1	13.5	0	0
128	1	4	1	8	2	13	2	1	2	3	2	1		2	43	37	1	2	1	1	0	0	1	0	0	1	1	1	0	0	0	1	0.946667	693	3	2	0	52.5	151.5			-0.7		0	1.28	0	11.8	1	0
129	1	4	1	5	1	13	2	2	2	3	2	1		2	48	39	1	2	1	1	1	0	1	0	0	1	1	1	0	0	0	1	0.823018	627	3	2	0	30.5	134.4			-2.91	1	1	-0.69	0	10.5	1	1
130	1	4	1	9	1	12	2	2	2	3	2	1		2	40	35	2	2	1	1	0	0	1	0	0	1	1	1	0	0	1	1	1.32078	831	3	2	0	27.8	132.7			-2.31	1	1	-1	0	13.7	0	0
131	1	4	1	5	2	14	2	2	2	3	2	1		2	46	37	1	2	1	1	1	1	1	1	0	1	1	1	0	1	1	1	0.991153	745	3	1	0	31.8	138.4			-3.08	2	1	-1.33	0	13.5	0	0
132	1	4	1	9	1	10	2	1	2	2	2	1		2	42	35	1	2	1	1	0	1	1	0	0	0	0	1	0	0	0	0	-1.48229	63	1	2	0	26.1	130.9	-1.15	0	-1.08		0	-0.77	0	11.5	0	0
133	1	4	1	4	2	14	2	1	1	3	2	1		2		35	1		1	1	1	1	1	1	0	1	1	1	0	1	1	1	0.991153	745	3	2	0	40.5	140			-2.85	1	1	0.39	0	15.2	0	0
134	1	4	1	8	1	12	2	2	2	2	2	1		2	42	36	2	2	0	0	0	0	1	0	0	0	0	1	0	0	0	0	-1.18609	180	1	2	0	22.6	125.9			-3.27	2	1	-2.17	1	14.1	0	0
135	1	4	1	9	1	10	2	2	2	2	2	1		2	38	31	1	2	1	1	1	1	1	0	0	0	0	1	0	0	0	0	-1.60594	31	1	2	0	26.1	131.9	-1.15	0	-0.92		0	-0.94	0	12.6	0	0
136	1	4	1	7	2	14	2	1	1	3	2	1		2	42	32	2	1	0	0	0	0	1	0	0	0	0	0	0	0	0	0	-1.27126	115	1	2	0	54.1	156.3			-0.5		0	0.84	0	15.5	0	0
137	1	4	1	12	2	13	2	1	2	2	2	2	1	2	99	99	2	2	0	0	0	0	1	0	0	1	1	1	0	0	0	1	0.948374	704	3	1	0	38.7	144.5			-1.71		0	-0.11	0	14.2	0	0
138	1	4	1	6	1	14	2	2	2	3	2	1		2	36	31	1	2	1	0	0	0	1	0	0	0	0	1	0	0	0	0	-1.15478	247	1	2	0	29.8	134.2			-3.77	2	1	-1.27	0	13	0	0
139	1	4	2	7	2	12	2	2	2	2	2	1		2		34	2		0	1	0	0	1	0	0	0	0	1	0	0	0	0	-1.21911	139	1	2	0	44.2	141			-1.5		0	1.39	0	16.1	0	0
140	1	4	1	6	2	12	2	1	2	3	1	1		2	35	28	1	2	1	1	0	1	1	0	0	1	1	1	0	0	0	1	0.652178	529	2	1	0	31.2	140.5			-1.57		0	-1.08	0	13.6	0	0
141	1	4	1	6	1	14	2	1	2	3	2	1		2	40	37	1	1	0	0	0	0	1	0	0	1	1	1	0	0	1	1	1.32249	844	3	2	0	27.8	132.9			-3.94	2	1	-1.81	0	11.4	1	1
142	1	4	1	7	1	14	2	2	2	2	2	1		2	48	33	1	2	1	1	0	0	1	1	0	1	1	1	0	0	0	1	0.927504	671	3	2	0	29.2	145.6			-2.29	1	1	-3.4	1	12.7	0	0
143	1	4	1	4	1	11	2	2	3	3	2	1		2	29	24	1	1	0	0	0	0	0	0	0	0	0	0	0	0	1	1	-0.270973	316	2	2	0	26.3	135.7			-1.1		0	-1.8	0	14.3	0	0
144	1	4	1	5	2	13	2	1	2	3	2	1		2	57	45	1	1	0	0	0	0	1	0	0	0	0	1	0	0	0	0	-1.18609	180	1	2	0	32	138.4			-2.59	1	1	-0.95	0	11.4	1	1
145	1	5	2	6	2	13	2	1	2	3	2	1		2		28	1		1	0	0	0	0	1	0	1	1	1	0	0	1	1	1.32684	848	3	2	0	26.3	135.7			-2.98	1	1	-2.46	1	13.9	0	0
146	1	5	1	8	2	13	2	1	2	3	2	1		2	50	42	1	1	0	0	0	0	1	0	0	0	0	1	0	0	0	0	-1.18609	180	1	2	0	39.1	149			-1.55		0	-0.82	0	11.5	1	0
147	1	5	1	7	1	13	2	1	2	3	2	1		2	39	34	1	2	0	1	0	0	1	0	0	1	0	1	0	0	0	0	-0.464895	310	2	2	0	33.8	143.5			-1.69		0	-0.97	0	13.1	0	0
148	1	5	1	7	1	13	2	2	2	3	2	1		2	41	36	1	1	0	0	0	0	1	0	0	0	0	0	0	0	0	0	-1.27126	115	1	2	0	27.8	136.8			-2.59	1	1	-2.06	1
149	1	5	2	7	2	13	2	1	1	3	2	1		2	25	21	2	2	1	0	0	1	1	1	0	1	1	1	1	0	1	1	0.856722	648	3	2	0	44.8	148.1			-1.68		0	0.31	0	12.5	0	0
150	1	5	1	6	2	13	2	2	2	3	2	1		2	38	32	1	2	1	1	0	0	1	0	0	1	1	1	0	0	1	1	1.32078	831	3	2	0	25.4	130.1			-3.79	2	1	-1.95	0
151	1	5	1	7	1	13	2	1	1	3	2	1		2	40	35	1	2	0	0	0	0	1	0	0	0	0	0	0	0	0	0	-1.27126	115	1	2	0	39.7	156.4			0.05		0	-1.08	0	12.1	0	0
152	1	5	1	7	2	13	2	1	2	3	2	1		2	36	30	2	2	1	0	0	1	1	1	0	1	1	1	0	0	1	1	1.04015	786	3	2	0	34.3	146.8			-1.38		0	-1.39	0	14.6	0	0
153	1	5	1	9	2	14	2	1	3	3	2	1		2	40	30	1	2	1	1	0	0	1	0	0	1	1	1	0	0	1	1	1.32078	831	3	2	0	38.8	148.4			-1.64		0	-0.82	0	9.5	1	0
154	1	5	1	5	2	13	2	2	2	3	2	1		2	50	43	1	1	1	0	0	0	1	0	0	1	1	1	0	0	0	1	0.979686	732	3	2	0	44	156.4			0		0	-0.34	0	14.8	0	0
155	1	5	1	4	2	13	2	1	2	3	2	1		2	45	99	1	1	0	0	0	0	1	1	0	0	0	0	0	0	0	0	-1.29042	110	1	2	0	42.2	149.4			-1		0	0.04	0	14.6	0	0
156	1	5	2	3	2	13	2	2	3	2	2	1		2		33	1		1	0	0	0	0	0	0	0	0	1	0	0	0	0	-1.16257	246	1	2	0	30.5	140			-2.36	1	1	-1.6	0	12.4	0	0
157	1	5	1	8	1	13	2	1	2	3	2	1		2	57	35	1	2	0	0	0	0	1	0	0	1	1	1	0	0	0	1	0.948374	704	3	1	0	43.8	151.4			-0.63		0	0.38	0	14.1	0	0
158	1	5	1	6	2	13	2	1	2	3	2	1		2	36	30	1	2	1	1	0	0	1	0	0	1	1	1	0	0	0	1	0.946667	693	3	2	0	50.7	157.4			0.15		0	0.6	0	15.5	0	0
159	1	5	1	9	1	14	2	2	2	3	2	1		2	38	28	1	2	1	1	0	1	1	1	0	1	1	1	0	0	1	1	1.00713	753	3	2	0	35.3	145.7			-2.27	1	1	-1.22	0	12.3	0	0
160	1	5	1	6	1	13	2	2	2	3	2	1		2	40	32	1	2	0	0	0	0	1	0	0	1	1	1	0	0	0	1	0.948374	704	3	2	0	28.5	133.7			-3.01	2	1	-1.27	0	13.6	0	0
161	1	5	1	9	1	13	2	2	2	3	2	1		2	45	30	1	1	0	0	0	0	1	0	0	0	0	1	0	0	0	0	-1.18609	180	1	2	0	35.7	145			-1.49		0	-0.64	0	11.1	1	0
162	1	5	1	9	2	13	2	2	2	3	2	1		2	47	30	1	1	0	0	1	0	1	0	0	0	0	1	0	0	0	0	-1.30974	106	1	2	0	38	154			-0.34		0	-1.32	0	13.6	0	0
163	1	5	1	5	1	14	2	1	2	3	2	1		2	32	27	1	1	1	1	0	0	1	0	0	1	1	1	0	0	1	1	1.32078	831	3	2	0	29.5	132.1			-4.04	2	1	-1.06	0	12.8	0	0
164	1	5	1	5	1	13	2	1	2	3	2	1		2		38	1		1	0	0	1	1	0	0	0	0	0	0	0	0	0	-1.53444	36	1	2	0	34.7	138.7			-2.33	1	1	-0.09	0	14	0	0
165	1	5	1	7	2	13	2	2	2	3	1	1		2	37	30	2	2	1	0	0	1	1	0	0	0	0	1	1	0	0	1	-0.998729	269	1	2	0	37.3	149.2			-1.03		0	-0.93	0	12.7	0	0
166	1	5	1	8	2	13	2	1	3	2	2	1		2	35	22	2	2	1	1	0	1	1	1	1	1	1	1	1	0	1	1	0.52634	470	2	2	0	34.2	147.4			-1.29		0	-1.49	0	11.9	1	0
167	1	5	1	4	1	14	2	2	3	2	2	1		2	36	26	2	1	1	0	0	0	1	0	0	0	0	0	0	0	0	1	-0.605982	289	2	2	0	29.8	141			-2.88	1	1	-2.37	1	10.5	1	1
168	1	5	1	14	2	13	2	1	2	3	2	1		2	68	45	1	2	1	0	0	1	1	0	0	0	0	0	0	0	1	1	-0.526357	305	2	2	0	42.7	155.7			-0.1		0	-0.51	0	13.1	0	0
169	1	5	1	7	2	13	2	2	2	3	2	1		2	43	37	1	2	1	0	0	0	1	1	0	0	0	0	0	0	0	0	-1.25911	127	1	2	0	39.4	152.4			-0.57		0	-0.82	0	13.3	0	0
170	1	5	1	6	1	13	2	1	2	3	2	1		2	37	35	1	2	1	1	0	0	1	0	0	1	0	1	0	0	0	1	0.200383	371	2	2	0	27.6	135.4			-2.78	1	1	-1.91	0	14.2	0	0
171	1	5	1	7	1	13	2	2	2	2	2	1		2	26	21	1	2	1	0	0	1	1	1	0	0	0	1	0	0	0	1	-0.834466	275	1	2	0	36.5	145.3			-1.45		0	-0.47	0	14.3	0	0
172	1	5	1	7	1	13	2	2	2	2	2	1		2	46	32	1	2	0	0	0	0	1	0	0	0	0	1	0	0	0	0	-1.18609	180	1	2	0	22.3	118.4			-5.07	2	1	-1.29	0	10.5	1	1
173	1	5	1	7	1	14	2	2	2	3	2	1		2	40	33	2	2	1	0	0	0	1	0	0	0	0	1	0	0	0	0	-1.15478	247	1	2	0	44.3	159.4			-0.49		0	-0.76	0	13.8	0	0
174	1	5	1	8	1	14	2	2	2	3	2	1		2	50	35	1	2	0	0	0	0	1	0	0	0	0	1	0	0	0	0	-1.18609	180	1	2	0	35.2	148.8			-1.87		0	-1.7	0	15	0	0
175	1	5	1	8	1	13	2	1	2	3	2	1		2	32	28	2	2	1	1	0	1	1	1	0	1	1	1	0	0	1	1	1.00713	753	3	2	0	34.2	149.3			-0.91		0	-1.69	0	15.8	0	0
176	1	5	1	8	1	14	2	2	2	3	2	1		2	36	30	1	2	0	0	0	0	1	0	0	0	0	1	0	0	0	0	-1.18609	180	1	2	0	27.3	130.8			-4.21	2	1	-1.66	0	14	0	0
177	1	5	1	11	2	13	2	2	2	3	2	1		2	56	48	2	2	1	0	0	1	1	0	0	1	1	1	1	1	0	1	0.609444	503	2	1	0	38.6	149.5			-0.99		0	-0.67	0	12.5	0	0
178	1	5	1	6	2	13	2	2	2	3	2	1		2	38	27	1	2	0	0	0	0	1	1	0	1	1	1	0	0	1	1	1.30332	827	3	2	0	32.2	141.3			-2.17	1	1	-1.26	0	10	1	1
179	1	5	2	3	2	14	2	2	2	2	2	1		2	38	26	2	2	1	0	0	0	1	0	0	0	0	0	0	0	0	0	-1.23995	129	1	2	0	35.1	147.7			-1.74		0	-1.61	0	12.6	0	0
180	1	5	1	7	1	14	2	2	2	2	2	1		2	38	34	1	1	1	1	0	0	1	1	0	1	1	1	0	0	0	1	0.927504	671	3	2	0	34	145.1			-2.35	1	1	-1.53	0	11.5	1	1
181	1	6	2	4	2	14	2	1	1	1	1	1		2		40	2		1	1	0	1	1	0	0	0	0	1	1	0	0	0	-1.66571	25	1	2	0	51.6	161			0.17		0	0.13	0	11	1	0
182	1	6	1	5	1	14	2	2	2	2	2	1		2	50	34	2	2	0	0	0	0	1	0	0	0	0	1	0	0	0	0	-1.18609	180	1	2	0	37	152.4			-1.4		0	-1.68	0	15.5	0	0
183	1	6	1	11	1	13	2	2	2	3	2	1		2	49	36	2	2	1	0	0	1	1	0	0	1	1	1	0	0	1	1	1.05931	792	3	2	0	37.2	145.3			-1.45		0	-0.3	0	13.1	0	0
184	1	6	1	3	1	13	2	2	3	2	2	1		2		47	1		0	0	0	0	1	0	0	1	1	1	0	0	1	1	1.32249	844	3	2	0	32.8	145.3			-1.45		0	-1.55	0	11.8	1	0
185	1	6	1	6	1	14	2	1	1	1	2	1		2	30	26	1	2	1	1	0	1	1	1	0	1	1	0	1	1	0	1	0.472095	459	2	2	0	27.8	139.1			-3.13	2	1	-2.9	1	14.1	0	0
186	1	6	1	7	1	14	2	2	1	1	2	1		2	41	35	1	2	1	0	0	0	1	0	0	0	0	1	0	0	0	0	-1.15478	247	1	2	0	38.5	153.3			-1.28		0	-1.38	0	12.8	0	0
187	1	6	1	10	1	14	2	2	1	1	2	1		2	40	30	1	2	1	1	0	0	1	1	0	1	1	1	0	0	1	1	1.30162	818	3	2	0	41.2	161.7			-0.19		0	-1.8	0	14.7	0	0
188	1	6	1	11	2	13	2	2	2	3	2	1		2	47	39	2	2	1	1	0	1	1	0	0	1	1	1	0	0	0	1	0.652178	529	2	2	0	35.4	147			-1.35		0	-1.12	0	14.4	0	0
189	1	6	1	7	1	13	2	2	2	2	2	1		2	40	30	1	1	1	0	0	0	1	0	0	1	1	1	0	0	0	1	0.979686	732	3	2	0	31.4	139.4			-2.24	1	1	-1.13	0	12.5	0	0
190	1	6	1	8	1	14	2	2	2	3	2	1		2	45			2	1	0	0	1	1	0	0	0	0	1	0	0	0	0	-1.44927	88	1	2	0	29.8	134.1			-3.78	2	1	-1.26	0	13.7	0	0
191	1	6	1	4	2	13	2	2	1	2	1	1		2	36			2	0	0	0	0	1	0	0	0	0	1	0	0	0	0	-1.18609	180	1	2	0	61.8	160.2			0.55		0	1.57	0	12.1	0	0
192	1	6	1	8	2	13	2	2	2	2	1	1		2	36	27	2	2	1	1	1	1	0	1	0	1	1	0	0	0	1	1	0.790522	609	3	2	0	56.7	169.4			1.88		0	0.36	0	13.6	0	0
193	1	6	1	10	2	13	2	2	2	3	2	1		2	39	32	1	2	1	0	0	0	1	0	0	1	1	1	0	0	1	1	1.3538	853	3	2	0	44.1	144.8			-1.67		0	0.78	0	14.4	0	0
194	1	6	1	7	2	14	2	2	3	3	2	1		2	41	35	1	1	1	1	0	0	0	0	0	1	1	1	0	0	1	1	1.31299	830	3	2	0	48	150.2			-1.38		0	0.58	0	11.9	1	0
195	1	6	2	4	1	14	2	2	1	3	2	1		2		32	1		1	1	0	0	1	0	0	1	1	0	0	1	0	1	0.969173	721	3	2	0	30.1	135.5			-3.6	2	1	-1.37	0	13.3	0	0
196	1	6	1	7	1	14	2	2	1	1	2	1		2	37	28	1	1	0	0	0	0	1	0	0	1	1	1	0	0	0	1	0.948374	704	3	2	0	22.6	130.1			-4.3	2	1	-3.75	1	13.1	0	0
197	1	6	1	4	2	14	2	2	2	3	2	1		2	36	28	1	2	1	0	0	0	1	0	0	1	1	1	0	0	0	1	0.979686	732	3	2	0	40.8	156.3			-0.5		0	-1.27	0	11.8	1	0
198	1	6	1	8	1	14	2	2	3	3	2	1		2	44	38	1	2	0	0	0	0	1	1	0	1	1	1	0	0	0	1	0.929211	684	3	2	0	31	138.8			-3.17	2	1	-1.57	0	12.5	0	0
199	1	6	1	6	1	13	2	2	2	3	2	1		2	40	28	1	2	0	0	0	0	1	0	0	0	0	1	0	0	0	1	-0.552127	298	2	2	0	34	141.6			-1.94		0	-0.65	0	14.9	0	0
200	1	6	1	7	2	14	2	2	2	3	2	1		2	32	27	1	1	0	0	0	0	1	0	0	0	0	1	0	0	0	0	-1.18609	180	1	2	0	37.1	141			-2.71	1	1	-0.36	0	11.5	1	1
201	1	6	1	6	1	14	2	2	2	3	2	1		2	48	35	2	2	1	1	1	1	1	1	1	1	1	1	1	0	1	1	0.402692	423	2	1	0	36.8	146.4			-2.18	1	1	-0.91	0	13	0	0
202	1	6	1	11	1	13	2	1	1	3	2	1		2	44	36	1	2	1	0	0	1	1	1	0	1	1	1	0	0	1	1	1.04015	786	3	2	0	37.2	147.4			-1.16		0	-0.56	0	12.9	0	0
203	1	6	1	7	1	13	2	2	2	2	2	1		2	39	36	1	2	1	1	0	0	1	1	0	1	1	0	0	0	0	1	0.842337	637	3	2	0	30	137.3			-2.52	1	1	-1.29	0	13.5	0	0
204	1	6	1	7	1	13	2	2	2	3	2	1		2	42	38	2	2	1	1	0	0	1	0	0	1	1	0	1	0	0	1	0.678073	556	2	2	0	32.5	140.2			-2.13	1	1	-0.89	0	14.1	0	0
205	1	6	1	5	2	13	2	2	1	3	2	1		2	48	41	1	2	1	1	1	1	1	1	0	1	1	1	1	0	1	1	0.700054	571	2	2	0	41.7	150.5			-0.85		0	-0.16	0	13.3	0	0
206	1	6	1	9	1	13	2	2	2	3	2	1		2	40	30	1	2	1	0	0	1	1	1	0	1	1	1	0	1	1	1	1.14782	807	3	2	0	28.8	142.3			-1.85		0	-2.6	1	13.3	0	0
207	1	6	1	6	1	14	2	2	2	3	2	1		2		33	2		1	0	0	1	1	0	0	0	1	1	0	0	0	1	-0.0690188	331	2	2	0	60.5	168.5			0.69		0	0.86	0	14.5	0	0
208	1	6	1	5	1	13	2	2	2	2	2	1		2	45	36	1	2	1	1	0	0	1	0	0	0	0	1	0	0	0	0	-1.1878	172	1	2	0	45	159.4			0.45		0	-0.25	0	13.5	0	0
209	1	6	1	9	2	14	2	2	2	3	2	1		2	42	35	1	1	1	0	0	0	1	0	0	1	1	1	0	0	1	1	1.3538	853	3	2	0	41.8	141.8			-2.59	1	1	0.43	0	15.2	0	0
210	1	6	1	8	2	14	2	2	2	3	2	1		2	37	31	1	2	1	1	0	0	1	0	0	1	1	1	0	0	1	1	1.32078	831	3	2	0	41.8	141.8			-2.59	1	1	0.43	0	12.3	0	0
211	1	6	2	8	2	13	2	2	2	3	2	1		2	36	30	1	2	1	0	0	0	1	0	0	0	0	1	0	0	0	1	-0.520815	306	2	2	0	39.1	145.6			-1.55		0	-0.14	0	12.5	0	0
212	1	6	1	10	1	13	2	2	2	3	2	1		2	52	40	1	2	0	1	0	1	1	1	0	1	1	1	0	0	1	1	0.975816	723	3	2	0	54	163.3			0.98		0	0.81	0	11	1	0
213	1	6	1	8	2	13	2	2	2	3	2	1		2	40	30	1	2	1	1	0	0	1	1	0	1	1	1	0	0	1	1	1.30162	818	3	2	0	42.5	165.1			1.26		0	-1.58	0	13	0	0
214	1	6	1	8	2	14	2	2	1	1	2	1		2	42	38	2	2	1	1	0	1	1	1	0	1	1	1	1	0	0	1	0.449589	449	2	2	0	48.4	166.6			0.98		0	-0.9	0	13.5	0	0
215	1	6	1	7	1	14	2	2	2	3	2	1		2	44	36	1	1	1	1	0	0	1	0	0	1	1	1	0	0	1	1	1.32078	831	3	2	0	49	164.2			0.13		0	-0.38	0	16.4	0	0
216	1	6	1	8	1	13	2	2	2	3	2	1		2	35	30	1	2	1	0	0	0	1	0	0	1	1	1	0	0	0	1	0.979686	732	3	2	0	32.7	145.4			-1.43		0	-1.6	0	12.8	0	0
217	2	1	1	7	1	7	1	1	2	3	2	1		2	50	44	1	2	1	1	0	1	1	1	1	1	1	1	1	0	1	1	0.52634	470	2	2	0	24.1	122.1	0.37	0	0.07		0	0.46	0	10.1	1	0
218	2	1	2	5	2	10	2	2	2	2	2	1		2	32	28	1	2	0	1	0	0	1	1	0	0	0	1	0	0	0	0	-1.23827	132	1	2	0	20	118.3	-3.1	2	-3.18	2	1	-1.37	0	11.4	1	1
219	2	1	2	5	1	12	2	1	1	3	2	1		2		38	1		0	0	0	0	1	1	1	1	1	1	0	0	0	1	0.631849	511	2	2	0	23.1	130.3			-2.65	1	1	-2.78	1	12.8	0	0
220	2	1	1	6	1	7	1	1	3	3	2	1		2	46	42	1	2	1	1	0	0	1	1	1	1	1	1	0	0	0	1	0.630142	510	2	1	0	27.8	125.9	1.35	0	0.79		0	1.27	0	10.4	1	0
221	2	1	1	6	1	7	1	1	2	3	2	1		1	40	35	1	1	1	1	0	1	1	0	1	1	1	1	0	0	1	1	0.728929	574	2	2	0	26.9	131	1.13	0	1.75		0	0.13	0	11	1	0
222	2	1	1	6	2	7	1	1	2	2	2	1		2	48	42	1	1	1	1	0	1	1	1	1	1	1	1	1	0	1	1	0.52634	470	2	2	0	23	120.8	0.18	0	0		0	0.21	0	12.4	0	0
223	2	1	1	5	1	12	2	1	1	3	2	1		2	28	25	1	2	1	1	0	1	1	1	1	0	0	1	1	0	0	0	-1.98224	1	1	2	0	21.7	120.5			-4.03	2	1	-1.6	0	13.4	0	0
224	2	1	1	5	1	7	1	1	3	3	2	1		2	34	30	1	1	0	1	0	0	1	1	1	0	0	1	0	0	0	0	-1.53564	34	1	2	0	24.8	124.3	0.57	0	0.49		0	0.39	0	10.3	1	0
225	2	1	1	6	1	7	1	1	3	3	2	1		2	38	32	1	2	1	1	0	1	1	1	1	1	1	1	1	0	1	1	0.52634	470	2	1	0	21.2	123.7	-0.57	0	0.37		0	-1.31	0	9.7	1	0
226	2	1	1	4	1	9	1	1	3	2	2	1		2	29	26	2	2	1	1	0	1	1	1	1	1	1	1	1	0	0	1	0.152227	355	2	1	0	19.4	113.2	-2.74	1	-3.22	2	1	-0.61	0	12.5	0	0
227	2	1	2	4	2	10	2	1	3	2	2	1		2	38	29	1	2	1	1	0	0	1	1	1	0	0	1	0	0	0	0	-1.50432	49	1	2	1	21.9	127.2	-2.43	1	-1.79		0	-1.95	0	11.5	0	0
228	2	1	2	5	2	12	2	1	1	3	2	1		2	38	32	1	2	0	0	0	0	1	1	1	1	1	1	0	0	0	1	0.631849	511	2	2	0	28.3	141.4			-1.44		0	-2.17	1	11.8	1	0
229	2	1	1	6	2	12	2	1	1	3	2	1		2	35	30	1	2	1	1	1	1	1	1	1	1	1	1	1	0	1	1	0.402692	423	2	2	0	26.4	136.6			-2.14	1	1	-2.18	1	12.9	0	0
230	2	1	1	6	1	8	1	1	1	3	2	1		2	48	43	1	1	0	0	0	1	1	1	0	0	0	1	0	0	0	0	-1.49974	55	1	2	0	18.1	117.3	-2.6	1	-1.76		0	-2.15	1	12.8	0	0
231	2	1	1	7	2	8	1	1	1	3	2	1		2	42	38	1	2	1	1	0	1	1	1	1	1	1	1	0	0	1	1	0.709766	572	2	2	0	18.1	117.3	-2.2	1	-1.6		0	-1.76	0	12.8	0	0
232	2	1	1	7	1	9	1	1	3	3	2	1		2	45	40	1	2	1	1	0	1	1	1	0	1	1	1	1	0	1	1	0.823702	628	3	2	0	25	125	-0.8	0	-1.26		0	-0.03	0	10.5	1	0
233	2	1	1	8	2	7	1	1	2	3	2	1		2	30	28	1	1	1	0	0	1	1	1	0	0	0	1	0	0	0	0	-1.46843	83	1	1	0	15.6	110.5	-2.56	1	-1.89		0	-1.96	0	9.5	1	0
234	2	1	1	5	2	7	1	1	1	3	1	1		2	30	28	1	2	1	0	0	1	1	1	1	1	1	1	1	0	1	1	0.559359	490	2	2	0	27.1	131.6	1.17	0	1.97		0	0.15	0	11.3	1	0
235	2	1	1	7	2	7	1	1	1	3	2	1		2	70	62	1	1	1	1	0	0	1	1	0	1	1	1	0	0	1	1	1.30162	818	3	2	0	18.1	117.3	-1.44	0	-0.64		0	-1.62	0	12.8	0	0
236	2	1	1	9	2	7	1	1	1	3	2	1		2	42	38	1	1	1	0	0	0	1	0	0	0	0	1	0	0	0	0	-1.15478	247	1	2	1	18.1	117.3	-1.44	0	-0.64		0	-1.62	0	12.8	0	0
237	2	1	1	5	2	12	2	1	1	1	2	1		2	32	29	1	2	1	0	1	0	1	1	1	1	1	1	1	0	0	1	0.356087	408	2	2	0	22.3	114			-5.44	2	1	-0.38	0	11.1	1	1
238	2	1	1	5	1	7	1	1	3	3	2	1		2	90	80	1	1	1	1	0	1	1	1	1	1	1	1	1	1	1	1	0.634013	520	2	2	0	22.4	119.4	-0.16	0	-0.44		0	0.16	0	13.5	0	0
239	2	1	1	4	1	7	1	1	1	3	2	1		2	32	29	2	2	1	1	0	1	1	1	1	1	1	1	1	0	1	1	0.52634	470	2	2	0	17.8	111.8	-1.93	0	-1.88		0	-0.97	0	9.4	1	0
240	2	1	1	7	1	7	1	1	2	2	2	1		2	52	46	1	1	0	1	0	1	1	1	1	1	1	1	1	0	1	1	0.495028	462	2	1	0	18.1	117.3	-1.8	0	-0.84		0	-1.99	0	12.8	0	0
241	2	1	1	4	1	9	1	1	3	3	2	1		2	25	23	2	2	1	1	0	1	1	1	1	1	1	1	1	0	0	1	0.152227	355	2	2	0	20.4	120.7	-2.33	1	-1.97		0	-1.52	0	9.4	1	0
242	2	1	1	5	1	7	1	1	2	3	2	1		2	50	48	1	1	1	1	0	1	1	1	0	0	0	0	1	0	0	0	-1.77004	14	1	2	1	25.3	131	0.71	0	1.75		0	-0.56	0	11.9	0	0
243	2	1	1	5	1	7	1	1	3	3	2	1		2	32	28	2	2	1	1	0	0	1	1	1	1	1	1	1	0	0	1	0.446716	443	2	2	0	19.5	111.6	-1.21	0	-1.92		0	0.12	0	10.5	1	0
244	2	1	1	6	1	7	1	1	3	3	2	1		2	40	38	2	2	1	1	0	1	1	1	1	1	1	1	1	0	1	1	0.52634	470	2	1	0	28.6	131.3	1.54	0	1.81		0	0.73	0	10.5	1	0
245	2	1	1	6	1	7	1	1	1	2	2	1		2	38	28	1	1	0	1	0	1	1	1	1	1	1	1	1	0	0	1	0.120915	351	2	2	0	27.7	138.5	1.33	0	3.17		0	-0.8	0	11.7	0	0
246	2	1	2	4	2	8	1	1	3	2	2	1		2		50	1		0	0	0	0	1	1	0	0	0	1	0	0	0	0	-1.20525	153	1	2	0	25.4	129.7	0.09	0	0.54		0	-0.34	0	13.3	0	0
247	2	1	1	7	2	7	1	1	3	3	2	1		2	30	24	1	2	1	1	0	1	1	1	1	1	1	1	1	0	1	1	0.52634	470	2	2	0	19.1	116.8	-1.06	0	-0.73		0	-0.94	0	10.7	1	0
248	2	1	1	5	1	8	1	1	1	3	2	1		2	50	47	1	1	1	1	0	0	1	1	0	1	1	1	0	0	1	1	1.30162	818	3	2	0	18.1	117.3	-2.6	1	-1.76		0	-2.15	1	12.8	0	0
249	2	1	1	5	1	8	1	1	3	3	2	1		2	40	38	1	2	1	1	0	1	1	1	1	1	1	1	1	0	0	1	0.152227	355	2	2	0	46.1	159	3.67	0	5.62		0	1.39	0
250	2	1	1	8	2	8	1	1	1	2	2	1		1	45	35	2	1	1	0	0	1	1	1	1	0	0	1	1	0	0	0	-1.94922	4	1	2	0	18.1	115.2	-2.2	1	-1.96		0	-1.36	0	11.1	1	0
251	2	1	1	5	1	10	2	1	3	3	2	1		2	50	46	1	1	1	1	0	1	1	1	1	1	1	1	1	0	1	1	0.52634	470	2	2	0	21.9	122.7	-2.44	1	-2.37	1	1	-1.29	0	15.1	0	0
252	2	1	1	6	2	8	1	1	2	2	2	1		2	35	30	1	2	1	1	0	0	1	1	1	0	0	1	1	0	0	0	-1.68775	21	1	2	0	24.2	128.5	-0.21	0	0.34		0	-0.63	0	10.5	1	0
253	2	2	1	9	1	8	1	1	3	3	2	1		1	40	36	1	1	1	1	0	0	1	0	0	0	0	1	0	0	0	0	-1.1878	172	1	2	0	21.3	115.2	-1.29	0	-2.14	1	1	0.2	0	11.8	0	0
254	2	2	1	6	2	10	2	1	3	3	1	1		2	40	34	1	1	1	1	0	1	1	0	1	1	1	1	0	0	1	1	0.728929	574	2	2	0	22	118.5	-2.4	1	-3.15	2	1	-0.5	0	11.5	0	0
255	2	2	1	8	2	10	2	1	3	2	1	1		1	50	46	1	1	1	0	0	1	1	0	0	0	0	1	0	0	1	0	-1.07516	266	1	2	0	32.1	141	0.04	0	0.37		0	-0.24	0	12.1	0	0
256	2	2	1	5	1	11	2	1	3	3	2	1		1	75	65	1	1	1	1	0	1	1	0	0	1	1	1	0	0	0	1	0.652178	529	2	2	0	29.3	134.8			-1.24		0	-0.47	0	11.2	1	0
257	2	2	1	7	2	9	1	1	3	3	2	1		1	40	35	1	1	0	0	0	1	1	0	0	1	1	1	0	0	1	1	1.028	779	3	2	0	20.8	127.5	-1.99	0	-0.82		0	-2.31	1	13.3	0	0
258	2	2	1	4	1	10	2	1	3	2	2	1		1	50	42	1	1	1	1	0	0	1	0	1	1	1	1	0	0	1	1	1.02342	766	3	2	0	29.3	138.2	-0.39	0	0.07		0	-0.7	0	13.5	0	0
259	2	2	1	6	2	9	1	1	3	2	2	1		1	30	26	1	1	1	1	0	1	1	0	0	0	0	1	1	0	0	0	-1.66571	25	1	2	0	24.8	123.1	-0.8	0	-1.54		0	0.14	0	10.7	1	0
260	2	2	1	7	1	10	2	1	3	2	2	1		1	45	40	1	1	1	1	0	1	1	0	1	1	1	1	1	0	0	1	0.17139	366	2	2	0	29.2	130.5	-0.41	0	-1.14		0	0.38	0	10.8	1	0
261	2	2	1	6	2	10	2	1	3	3	2	1		1	40	35	1	1	1	1	0	1	1	1	1	0	0	1	0	0	0	0	-1.79881	11	1	2	0	19.8	115.6	-3.16	2	-3.6	2	1	-1.01	0	10.7	1	1
262	2	2	1	8	1	12	2	1	3	3	2	1		1	40	30	1	1	1	1	0	1	1	0	0	1	1	1	0	0	1	1	1.02629	768	3	2	0	25.8	131.5			-2.48	1	1	-1.62	0	11	1	1
263	2	2	1	7	2	10	2	1	3	2	2	1		1	50	46	1	1	1	1	0	1	1	1	1	1	1	1	1	0	1	1	0.52634	470	2	2	0	22.8	125.6	-2.14	1	-2.04	1	1	-1.26	0	13.7	0	0
264	2	2	1	8	1	11	2	1	3	3	2	1		2	35	32	1	1	1	1	0	1	1	0	0	1	1	1	0	0	0	1	0.652178	529	2	2	0	21.3	133.6			-1.41		0	-4.11	1	14.3	0	0
265	2	2	1	7	2	11	2	1	3	2	2	1		1	35	32	1	1	1	1	0	1	1	0	1	1	1	1	0	0	1	1	0.728929	574	2	2	0	24.8	128.2			-2.53	1	1	-1.16	0	11.2	1	1
266	2	2	1	6	1	8	1	1	3	2	2	1		2	35	30	1	1	1	1	0	1	1	0	1	1	1	1	0	0	1	1	0.728929	574	2	1	0	21.2	125.2	-1.33	0	-0.37		0	-1.78	0	11.1	1	0
267	2	2	1	5	1	10	2	1	3	3	2	1		2	30	25	1	1	1	1	0	1	1	0	0	1	1	1	1	0	1	1	0.842865	641	3	2	0	23.8	123.2	-1.81	0	-2.29	1	1	-0.47	0	12	0	0
268	2	2	1	7	1	9	1	1	3	2	2	1		1	30	25	1	1	0	1	0	1	1	0	1	0	0	1	0	0	0	0	-1.81096	8	1	2	0	28.4	132.8	0.07	0	0.04		0	0.03	0	13.1	0	0
269	2	2	1	6	1	9	1	1	3	3	2	1		1	30	25	1	1	1	1	0	0	1	0	1	0	0	1	0	0	0	0	-1.48516	60	1	2	0	30.2	125.2	0.46	0	-1.23		0	1.57	0	11.4	1	0
270	2	2	1	6	2	10	2	1	3	2	2	1		2	30	26	1	2	1	0	0	0	1	1	1	1	1	1	1	0	1	1	0.853848	644	3	2	1	21.8	118.7	-2.47	1	-3.12	2	1	-0.61	0	9.5	1	1
271	2	2	1	6	1	9	1	1	3	2	2	1		1	42	30	1	1	1	1	0	1	1	0	1	1	1	1	1	0	0	1	0.17139	366	2	2	0	19.2	117	-2.83	1	-2.59	1	1	-1.5	0	10.5	1	1
272	2	2	1	6	1	11	2	1	3	3	2	1		1	50	36	1	1	0	0	0	0	1	0	0	0	0	1	0	0	0	1	-0.552127	298	2	2	0	26.7	125.9			-2.56	1	1	-0.05	0	11.5	0	0
273	2	2	2	3	1	10	2	1	3	3	2	2	1	1		30	1		0	0	0	0	1	0	0	0	0	1	0	0	0	0	-1.18609	180	1	2	0	25	125	-1.46	0	-2.01	1	1	-0.26	0	10.5	1	1
274	2	2	1	9	1	9	1	1	3	3	2	1		1	40	36	1	1	1	1	0	1	1	0	1	1	1	1	1	1	1	1	0.653176	541	2	2	0	22.5	119.7	-1.57	0	-2.14	1	1	-0.22	0	12.1	0	0
275	2	2	1	8	1	8	1	1	3	3	2	1		1	40	35	1	1	1	1	0	0	1	0	1	0	0	1	0	0	0	0	-1.48516	60	1	2	0	19.8	118.5	-1.87	0	-1.55		0	-1.25	0	11.9	0	0
276	2	2	1	6	1	8	1	1	3	3	2	1		1	45	40	1	1	0	0	0	0	1	0	0	1	1	1	0	1	0	1	1.05605	789	3	2	0	17.2	114	-3.03	2	-2.35	1	1	-2.07	1	10.4	1	1
277	2	2	1	7	2	9	1	1	3	3	2	1		2	38	32	1	2	1	0	1	1	1	0	0	1	1	1	1	1	1	1	0.859909	650	3	1	0	25.4	128	-0.64	0	-0.74		0	-0.33	0	12.3	0	0
278	2	2	1	6	1	9	1	1	3	3	2	1		1	45	36	1	1	1	1	0	0	1	0	0	1	1	1	1	1	0	1	0.870913	652	3	2	0	28.1	133.2	0	0	0.11		0	-0.13	0	12.5	0	0
279	2	2	2	4	1	10	2	1	3	2	2	1		1		35	1		1	0	0	1	1	0	0	0	0	1	0	0	0	0	-1.44927	88	1	2	0	32	147.2	0.16	0	1.48		0	-1.12	0	13.5	0	0
280	2	2	1	8	2	11	2	1	3	3	2	1		1	30	28	1	1	1	1	0	0	1	0	0	1	1	1	1	1	0	1	0.870913	652	3	2	0	34.2	151.2			0.93		0	-1.24	0	11.7	0	0
281	2	2	2	5	2	10	2	1	3	2	1	1		2	35	30	1	1	1	1	0	0	1	0	0	0	0	1	0	0	0	0	-1.1878	172	1	2	0	20.3	122.3	-2.99	1	-2.55	1	1	-1.92	0	12.3	0	0
282	2	2	1	5	1	9	1	1	3	3	2	1		2	30	25	1	1	1	1	0	1	1	0	1	1	1	1	0	1	1	1	0.836602	634	3	2	0	25.8	124	-0.58	0	-1.42		0	0.43	0	12	0	0
283	2	2	1	7	1	9	1	1	3	3	2	1		1	30	26	1	1	1	1	0	0	1	0	0	1	1	1	0	0	0	1	0.946667	693	3	2	0	25	125.6	-0.8	0	-1.16		0	-0.13	0	14.9	0	0
284	2	2	1	7	2	10	2	1	3	2	2	1		1	35	32	1	1	1	1	0	1	1	0	0	1	1	1	0	0	0	1	0.652178	529	2	2	0	28	134	-0.78	0	-0.72		0	-0.54	0	10.2	1	0
285	2	2	1	5	2	9	1	1	3	2	2	1		1	40	36	1	1	1	1	0	0	1	0	0	1	1	1	0	0	0	1	0.946667	693	3	2	0	22.5	121.5	-1.44	0	-1.8		0	-0.48	0	10.5	1	0
286	2	2	1	9	1	9	1	2	3	3	2	1		1	40	35	1	1	1	1	0	1	1	0	0	1	1	1	0	0	1	1	1.02629	768	3	1	0	20.1	118.9	-2.45	1	-2.27	1	1	-1.33	0	9.5	1	1
287	2	2	1	9	2	8	1	1	3	2	2	1		1	35	33	1	1	0	0	0	0	1	0	0	0	0	1	0	0	0	0	-1.18609	180	1	2	0	19.7	123.5	-1.58	0	-0.53		0	-1.97	0	13.7	0	0
288	2	2	2	3	2	11	2	1	3	1	2	1		2		50	1		1	0	0	1	1	0	0	0	0	1	0	1	0	0	-1.3416	105	1	2	1	37.6	145.3			0.05		0	0.25	0	10.5	1	0
289	2	3	1	5	1	10	2	1	3	2	2	1		2	30	28	2	2	1	1	0	0	1	1	0	0	0	1	0	0	1	0	-0.832849	276	1	2	1	23.6	127.4	-1.87	0	-1.63		0	-1.3	0	11.8	0	0
290	2	3	1	7	2	9	1	1	3	2	2	1		2	52	49	2	2	1	1	0	1	1	1	1	1	1	1	1	0	0	1	0.152227	355	2	2	0	31.1	137.9	0.57	0	0.88		0	0.13	0	11.2	1	0
291	2	3	1	5	2	11	2	1	3	2	2	1		2	32	28	2	2	1	0	0	1	1	1	1	1	1	1	1	0	0	1	0.185247	369	2	2	0	28.8	131.6			-2.02	1	1	-0.29	0	11.9	0	0
292	2	3	1	7	1	10	2	1	3	3	2	1		2	40	34	2	2	0	1	0	0	1	1	1	1	1	1	1	0	1	1	0.789516	608	3	1	1	22.4	126	-2.27	1	-1.85		0	-1.66	0	11.5	0	0
293	2	3	1	5	2	10	2	1	3	3	2	1		2	31	28	1	2	0	0	0	1	1	0	0	0	0	0	1	0	0	0	-1.74917	16	1	1	0	20.2	122.8	-3.03	2	-2.48	1	1	-2.06	1	11	1	1
294	2	3	2	6	1	11	2	1	3	3	2	1		2		49	1		0	1	0	1	1	1	1	0	0	1	0	0	0	0	-1.83012	6	1	1	0	24.9	129			-2.1	1	1	-1.25	0	9.9	1	1
295	2	3	1	4	2	9	1	1	3	3	2	1		2	32	28	2	2	0	1	0	1	1	1	1	1	0	1	1	0	0	1	-0.625369	288	2	2	0	27.1	127.2	-0.24	0	-0.87		0	0.33	0	12.3	0	0
296	2	3	1	6	1	12	2	1	2	2	2	1		2	28	25	1	1	1	1	0	0	1	1	1	1	1	1	1	0	0	1	0.446716	443	2	2	0	24	131.1			-2.54	1	1	-2.43	1	11.8	1	1
297	2	3	1	5	1	13	2	1	3	3	2	1		2	40	35	2	1	1	1	0	0	1	1	1	1	1	1	1	0	0	1	0.446716	443	2	2	0	23.4	121			-4.72	2	1	-1.24	0	12.1	0	0
298	2	3	1	6	1	9	1	1	3	3	2	2	1	2	35	30	1	1	1	1	0	0	1	1	0	1	1	1	0	0	1	1	1.30162	818	3	2	0	24.9	128.9	-0.83	0	-0.61		0	-0.72	0	13.1	0	0
299	2	3	1	7	1	10	2	1	3	3	2	1		2	62	57	1	2	1	1	0	1	1	1	1	1	1	1	1	0	1	1	0.52634	470	2	2	0	22.3	129.2	-2.3	1	-1.35		0	-2.37	1	13.1	0	0
300	2	3	1	7	2	12	2	1	3	2	2	1		2	49	42	1	2	0	1	0	1	1	1	1	1	1	1	1	0	1	1	0.495028	462	2	2	0	25	126			-3.69	2	1	-1.12	0
301	2	3	1	8	2	12	2	1	3	2	2	1		2	42	35	1	1	1	1	1	1	1	1	1	1	1	1	1	0	1	1	0.402692	423	2	2	0	23.6	127.4			-3.48	2	1	-1.89	0
302	2	3	1	5	1	10	2	1	1	2	2	1		2	30	28	2	2	1	1	0	0	0	1	1	1	1	1	1	0	0	1	0.438924	442	2	2	0	30.6	139.2	-0.11	0	0.22		0	-0.4	0	14.1	0	0
303	2	3	1	6	1	10	2	1	3	3	2	1		2	38	25	1	2	1	1	1	1	1	1	1	1	1	1	1	0	1	1	0.402692	423	2	1	0	24	128.8	-1.75	0	-1.41		0	-1.36	0	12	0	0
304	2	3	1	8	1	11	2	1	2	2	2	1		2	45	40	2	2	1	1	0	1	1	1	1	1	1	1	1	0	1	1	0.52634	470	2	1	0	27.5	132.4			-1.59		0	-0.74	0	11.6	0	0
305	2	3	1	6	1	12	2	1	3	3	2	1		2	45	30	1	1	1	1	0	0	1	1	1	1	1	1	1	0	0	1	0.446716	443	2	1	0	33.4	136.1			-1.83		0	0.24	0	15.7	0	0
306	2	3	2	5	1	12	2	1	3	2	2	1		2		32	2		1	1	0	1	1	1	1	0	0	1	0	0	0	0	-1.79881	11	1	2	0	24.5	125.8			-3.29	2	1	-1.21	0	10.4	1	1
307	2	3	1	5	1	10	2	1	3	3	2	1		2	42	36	1	1	0	1	0	0	1	1	1	1	1	1	0	0	1	1	0.972943	722	3	2	0	24.9	123.6	-1.48	0	-2.22	1	1	-0.08	0	11.4	1	1
308	2	3	1	6	1	11	2	1	3	3	1	1		2	40	36	1	2	0	1	0	1	1	1	1	0	0	1	0	0	0	0	-1.83012	6	1	2	0	29.6	137.8			-0.79		0	-0.81	0	10.2	1	0
309	2	3	1	5	1	10	2	1	3	2	2	1		2	35	32	1	1	0	1	0	1	1	1	1	1	1	1	0	0	0	1	0.304341	386	2	2	1	23.6	127.4	-1.87	0	-1.63		0	-1.3	0
310	2	3	1	8	1	9	1	1	3	3	2	1		2	48	45	1	1	1	1	0	0	1	1	1	1	1	1	1	0	1	1	0.820828	619	3	2	0	22	120.6	-1.74	0	-1.99		0	-0.62	0	14.1	0	0
311	2	3	1	7	2	10	2	1	3	2	2	1		2	50	42	1	2	1	1	0	1	1	1	1	1	1	1	1	0	0	1	0.152227	355	2	1	0	23.6	127.4	-1.9	0	-1.76		0	-1.2	0
312	2	3	1	6	2	10	2	1	3	2	2	1		2	32	30	1	1	1	1	0	1	1	1	1	0	1	1	1	0	0	1	-0.601989	290	2	2	0	21.5	121.9	-2.57	1	-2.62	1	1	-1.25	0	10.1	1	1
313	2	3	1	6	1	10	2	1	3	3	1	1		2	53	44	2	2	1	1	1	1	1	1	1	1	0	1	1	0	1	1	-0.343593	315	2	2	0	30.6	142.6	-0.11	0	0.76		0	-0.91	0	10.5	1	0
314	2	3	1	8	1	9	1	1	3	3	2	1		2	55	50	1	1	0	0	0	0	1	1	0	1	1	1	0	0	0	1	0.929211	684	3	1	0	24.3	130	-1	0	-0.43		0	-1.2	0	10.5	1	0
315	2	3	1	6	2	12	2	1	3	2	2	1		2	35	33	1	1	1	1	0	1	1	1	1	1	1	1	0	0	0	1	0.335654	401	2	2	0	19.9	117.4			-4.95	2	1	-1.97	0	11.6	1	1
316	2	3	1	6	1	10	2	1	1	3	2	1		2	49	42	1	1	1	1	0	1	1	1	1	1	1	1	1	0	0	1	0.152227	355	2	2	0	29.1	136.1	-0.43	0	-0.26		0	-0.45	0	13.7	0	0
317	2	3	1	6	1	10	2	1	3	3	2	1		2	48	35	1	2	1	1	0	0	1	1	1	1	1	1	1	0	1	1	0.820828	619	3	2	0	32	135	0.16	0	-0.44		0	0.59	0
318	2	3	1	6	1	9	1	1	3	2	2	1		2	70	59	1	2	1	1	0	0	1	1	1	1	1	1	1	0	1	1	0.820828	619	3	2	0	25.7	125.4	-0.61	0	-1.19		0	0.18	0	13.9	0	0
319	2	3	1	6	2	10	2	1	3	3	1	1		2	39	35	1	2	1	1	0	1	1	1	1	1	1	1	1	0	1	1	0.52634	470	2	2	0	26	125	-1.25	0	-2.13	1	1	0.01	0	10.6	1	1
320	2	3	1	5	2	11	2	1	2	3	2	1		2	39	34	1	2	1	1	0	0	1	1	1	0	0	1	0	0	0	0	-1.50432	49	1	2	1	41.7	148.4			0.51		0	0.69	0	13.5	0	0
321	2	3	1	7	1	10	2	1	3	2	2	1		2	49	45	1	1	0	1	0	1	1	1	1	1	1	1	0	0	0	1	0.304341	386	2	2	1	28	130	-0.68	0	-1.22		0	0.07	0	11.5	0	0
322	2	3	1	6	1	11	2	1	3	2	2	1		2	40	35	1	1	1	1	0	1	1	1	1	1	1	1	1	0	1	1	0.52634	470	2	2	0	23.6	127.4			-2.33	1	1	-1.59	0
323	2	3	1	6	1	12	2	2	3	2	2	1		2	47	44	1	1	1	0	0	0	1	1	0	1	1	0	0	0	1	1	1.24947	815	3	2	1	47.5	158.2			1.29		0	0.64	0	12	0	0
324	2	3	1	8	2	10	2	1	3	2	2	1		2	39	37	2	1	1	1	0	0	1	1	1	1	1	1	1	0	1	1	0.820828	619	3	1	0	23.6	127.4	-1.9	0	-1.76		0	-1.2	0
325	2	4	1	8	1	12	2	1	3	2	2	1		1	50	46	1	1	1	1	0	1	1	0	1	1	1	1	0	0	1	1	0.728929	574	2	2	0	30.6	138.2			-1.54		0	-0.85	0	13.5	0	0
326	2	4	1	7	2	11	2	1	3	2	2	1		1	30	26	1	1	1	1	0	1	1	0	0	1	1	1	0	0	0	1	0.652178	529	2	1	0	28.4	135			-1.5		0	-0.86	0	9.9	1	0
327	2	4	1	7	2	11	2	1	3	3	2	1		1	36	32	1	1	1	1	0	1	1	0	1	1	1	1	0	0	1	1	0.728929	574	2	2	0	37.4	144.5			-0.07		0	0.29	0	12.1	0	0
328	2	4	1	5	1	10	2	1	3	3	2	1		1	35	32	1	1	1	1	0	1	1	0	0	1	1	1	0	0	1	1	1.02629	768	3	2	0	27.7	131.5	-0.75	0	-0.99		0	-0.25	0	10.7	1	0
329	2	4	1	8	2	10	2	1	3	2	2	1		1	35	32	1	1	1	0	0	1	1	0	0	0	0	1	1	0	0	0	-1.63269	28	1	2	0	20.7	117.5	-2.85	1	-3.3	2	1	-0.9	0	11.7	0	0
330	2	4	1	6	1	12	2	1	3	2	1	1		1	32	28	2	2	1	0	1	1	1	1	1	1	1	1	1	0	1	1	0.435711	439	2	2	0	30	131			-2.55	1	1	-0.03	0
331	2	4	1	7	1	12	2	1	3	3	2	1		1	30	26	1	1	1	1	0	1	1	0	0	1	1	1	1	0	0	1	0.468752	457	2	1	0	25	120			-4.1	2	1	-0.09	0
332	2	4	1	8	2	12	2	1	3	3	2	1		1	45	40	1	1	1	1	0	1	1	0	0	1	1	1	0	0	1	1	1.02629	768	3	2	0	33.7	142			-1.35		0	-0.59	0	11.9	1	0
333	2	4	1	7	1	11	2	1	3	3	2	1		1	40	36	1	1	1	1	0	1	1	0	1	1	1	1	1	1	1	1	0.653176	541	2	1	0	52	159.3			2.41		0	1.46	0	11.2	1	0
334	2	4	1	8	1	12	2	1	3	3	2	1		1	35	32	1	1	0	1	0	1	1	0	1	0	0	1	0	0	0	0	-1.81096	8	1	2	0	24.4	129.4			-2.78	1	1	-1.9	0	11.1	0	0
335	2	4	2	5	1	10	2	1	3	2	2	1		1		40	1		1	1	0	1	1	0	0	1	1	1	0	0	1	1	1.02629	768	3	1	1	33.2	139.4	0.38	0	0.25		0	0.35	0	12.1	1	0
336	2	4	1	6	1	10	2	1	3	3	2	1		1	30	26	1	1	1	1	0	1	1	0	1	0	0	1	0	0	0	0	-1.77965	13	1	2	0	26.3	135.7	-1.1	0	-0.33		0	-1.51	0	11.4	1	0
337	2	4	1	3	2	12	2	1	3	2	2	1		1	60	50	1	1	1	1	0	0	1	0	0	1	1	1	0	0	1	1	1.32078	831	3	2	0	28.8	140.4			-1.58		0	-1.84	0	10.5	1	0
338	2	4	1	7	2	11	2	1	3	3	2	1		1	35	32	1	1	0	0	0	1	1	0	0	0	0	1	0	0	0	0	-1.48058	71	1	1	0	34.3	140.9			-0.62		0	0.01	0
339	2	4	1	7	1	10	2	1	3	3	2	1		1	30	25	1	1	1	1	0	0	1	0	0	1	1	1	0	0	0	1	0.946667	693	3	2	0	26	130	-1.18	0	-1.22		0	-0.67	0	9.5	1	0
340	2	4	1	7	2	10	2	1	3	2	2	1		1	35	30	1	1	0	0	0	0	1	1	0	0	0	1	0	0	0	0	-1.20525	153	1	2	0	29.5	137.4	-0.46	0	-0.19		0	-0.52	0	14	0	0
341	2	4	1	7	1	11	2	1	3	2	2	1		1	45	35	1	1	1	1	0	1	1	0	1	1	1	1	0	0	1	1	0.728929	574	2	2	0	32.8	148.1			0.74		0	-1.26	0	13.4	0	0
342	2	4	1	8	2	12	2	1	3	3	2	1		1	35	26	1	1	1	1	0	0	1	0	1	0	0	1	0	0	0	0	-1.48516	60	1	2	0	28.8	132.5			-2.74	1	1	-0.75	0	11.7	1	1
343	2	4	1	4	2	12	2	1	3	3	2	1		1	30	26	1	1	1	1	0	1	1	0	0	0	0	1	0	1	0	0	-1.37461	98	1	2	0	33.4	146.4			-0.71		0	-1.21	0	12.8	0	0
344	2	4	1	6	1	10	2	1	3	3	2	1		2	30	25	1	2	0	1	0	0	1	1	1	0	0	1	0	0	0	0	-1.53564	34	1	1	1	32.6	140.2	0.27	0	0.38		0	0.08	0	11.4	1	0
345	2	4	1	8	2	10	2	1	3	2	2	1		1	45	35	1	1	0	0	0	0	1	0	0	1	1	1	0	0	0	1	0.948374	704	3	2	0	25	122.5	-1.51	0	-2.52	1	1	0.02	0
346	2	4	1	6	2	11	2	1	3	3	2	1		1	45	42	1	1	0	1	0	1	1	0	0	1	1	1	0	0	0	1	0.620866	504	2	2	0	44.9	147.6			0.39		0	1.23	0	11.5	0	0
347	2	4	1	7	2	12	2	1	3	3	2	1		1	35	30	1	1	1	1	0	1	1	0	0	1	1	1	0	0	0	1	0.652178	529	2	2	0	25	127.9			-3.41	2	1	-1.4	0	11	1	1
348	2	4	1	8	1	11	2	1	3	2	2	1		1	45	35	1	1	1	1	0	1	1	0	1	0	1	1	0	0	0	0	-1.03337	268	1	2	0	26	135.6			-1.12		0	-1.93	0	13.1	0	0
349	2	4	1	6	2	12	2	1	2	2	2	1		1	50	45	1	1	1	1	0	1	1	0	0	1	1	1	0	0	0	1	0.652178	529	2	1	0	40	143			-1.2		0	0.6	0
350	2	4	1	7	1	10	2	1	3	2	2	1		1	60	40	1	1	0	0	0	1	1	0	0	1	1	1	0	1	1	1	1.13567	803	3	2	0	31.9	137.5	0.14	0	-0.04		0	0.24	0	10.5	1	0
351	2	4	1	5	1	12	2	1	3	2	2	1		1	55	50	1	1	1	1	1	0	1	0	1	1	1	1	1	1	1	1	0.824016	631	3	2	0	27	135			-1.99		0	-1.7	0	10.2	1	0
352	2	4	1	6	1	13	2	1	3	2	2	1		1	35	32	1	1	1	1	0	1	1	0	0	0	0	1	0	0	0	0	-1.48229	63	1	2	0	25.3	130.1			-3.49	2	1	-1.99	0	11.2	1	1
353	2	4	1	8	1	10	2	1	3	2	2	1		1	60	30	1	1	0	0	0	0	1	0	0	0	0	1	0	0	0	0	-1.18609	180	1	2	0	18.7	114	-3.62	2	-3.73	2	1	-1.42	0	12	0	0
354	2	4	1	7	2	10	2	1	3	2	2	1		1	40	35	1	1	1	1	0	1	1	0	1	1	1	1	0	0	0	1	0.354816	405	2	1	1	33.3	146	0.25	0	1.15		0	-0.52	0	12.6	0	0
355	2	4	2	5	1	10	2	1	3	2	2	1		2		48	1		1	1	0	1	1	1	1	1	1	1	0	0	0	1	0.335654	401	2	2	0	24.9	121	-1.48	0	-2.63	1	1	0.31	0	10.5	1	1
356	2	4	1	6	1	11	2	1	3	2	2	1		1	30	26	1	1	1	1	0	1	1	0	0	1	1	1	0	0	1	1	1.02629	768	3	2	0	31.5	139.1			-0.6		0	-0.37	0	10.5	1	0
357	2	4	1	8	1	11	2	1	3	2	2	1		1	45	30	1	1	1	1	0	0	1	0	1	1	1	1	0	0	1	1	1.02342	766	3	1	0	31.1	141.2			-0.28		0	-0.8	0	12.9	0	0
358	2	4	1	6	2	10	2	1	3	2	2	1		1	35	25	1	1	0	0	0	1	1	0	0	0	0	1	0	1	0	0	-1.37291	99	1	2	1	30	140	-0.35	0	0.21		0	-0.71	0	11.6	0	0
359	2	4	1	4	1	10	2	1	3	2	2	1		2	45	35	2	2	1	1	0	1	1	1	1	1	1	1	1	0	0	1	0.152227	355	2	2	0	36	141.3	0.84	0	0.55		0	0.81	0	11.7	0	0
360	2	4	1	8	2	11	2	1	3	2	2	1		2	35	30	2	1	1	0	0	0	1	1	1	1	1	1	0	0	0	1	0.663161	550	2	1	1	22.3	124.2			-3.13	2	1	-1.58	0	12.5	0	0
361	2	5	1	6	1	12	2	1	3	3	2	1		1	50	45	1	1	1	1	0	1	1	0	0	1	1	1	1	0	0	1	0.468752	457	2	1	0	39	159			1.4		0	-1.25	0	11.5	1	0
362	2	5	1	7	1	11	2	1	3	3	2	1		1	45	40	1	1	1	1	0	1	1	0	0	1	1	1	0	0	1	1	1.02629	768	3	2	0	33.6	142.4			-0.11		0	-0.2	0	12.4	0	0
363	2	5	1	7	2	12	2	1	3	3	2	1		1	40	36	1	1	1	1	0	1	1	0	1	1	1	1	0	0	0	1	0.354816	405	2	2	0	36.9	147			-0.62		0	-0.41	0
364	2	5	2	9	2	13	2	1	3	3	2	1		1	40	36	1	1	1	1	0	1	1	0	0	1	1	1	0	0	0	1	0.652178	529	2	2	0	39	151.2			-0.75		0	-0.77	0	10.3	1	0
365	2	5	1	7	1	12	2	1	3	2	2	1		1	30	26	1	1	0	0	0	0	1	0	0	0	0	1	0	0	0	0	-1.18609	180	1	2	0	33.2	141.9			-1.01		0	-0.56	0	10.5	1	0
366	2	5	1	8	1	13	2	1	3	2	2	1		1	40	36	1	1	1	1	0	1	1	0	0	1	1	1	0	0	0	1	0.652178	529	2	2	0	32	134			-2.97	1	1	-0.2	0
367	2	5	1	9	2	12	2	1	3	2	2	1		1	35	30	1	1	1	1	0	1	1	0	0	0	0	1	0	0	0	0	-1.48229	63	1	2	0	28.1	138.2			-1.91		0	-1.77	0	11.9	1	0
368	2	5	1	4	1	12	2	1	3	2	2	1		1	40	35	1	1	1	1	0	1	1	1	0	1	1	1	0	0	1	1	1.00713	753	3	2	0	35.7	148.5			-0.08		0	-0.74	0	11.5	1	0
369	2	5	1	6	1	13	2	1	3	2	2	1		1	85	70	1	1	1	1	0	1	1	0	1	1	1	1	0	0	1	1	0.728929	574	2	2	0	27.5	136.7			-2.6	1	1	-2.18	1
370	2	5	1	7	1	13	2	1	3	2	1	1		2	40	35	1	1	1	1	0	1	1	0	0	1	1	1	0	0	0	1	0.652178	529	2	1	1	37.6	144.7			-1.53		0	-0.13	0	12.5	0	0
371	2	5	1	8	1	13	2	1	3	3	2	1		1	40	30	1	1	1	1	0	1	1	0	0	1	1	1	0	0	1	1	1.02629	768	3	2	0	29.8	138.5			-2.36	1	1	-1.55	0	11.4	1	1
372	2	5	1	6	2	13	2	1	3	3	2	1		2	30	25	1	1	0	0	0	1	1	0	0	0	0	1	1	0	0	0	-1.66401	27	1	2	0	35.4	142.4			-2.01	1	1	-0.58	0	14.3	0	0
373	2	5	1	7	1	13	2	1	3	3	2	1		1	40	36	1	1	1	1	0	0	1	0	0	1	1	1	0	0	0	1	0.946667	693	3	2	1	46.8	158			0.26		0	0.23	0	13.6	0	0
374	2	5	1	8	2	13	2	1	3	2	2	1		1	40	36	1	1	1	1	0	1	1	0	1	1	1	1	0	0	1	1	0.728929	574	2	2	0	30.8	137.3			-2.75	1	1	-1.15	0	11	1	1
375	2	5	1	9	2	12	2	1	3	3	2	1		1	30	25	1	1	1	1	0	1	1	0	1	1	1	1	0	0	1	1	0.728929	574	2	2	0	32	133			-2.67	1	1	0.04	0	12	0	0
376	2	5	1	10	1	13	2	1	3	2	2	1		1	35	30	1	1	0	0	0	1	1	0	0	0	0	1	0	0	0	0	-1.48058	71	1	2	0	34.6	144.4			-1.57		0	-0.86	0	12.8	0	0
377	2	5	1	8	2	13	2	1	3	2	2	1		1	40	36	1	1	1	1	0	1	1	0	0	0	0	1	0	0	0	0	-1.48229	63	1	1	1	50.8	158.8			0.35		0	0.49	0	11.1	1	0
378	2	5	1	6	2	13	2	1	3	2	2	1		2	35	28	1	1	1	1	0	0	1	0	0	1	1	1	0	0	0	1	0.946667	693	3	1	0	37.8	151			-0.77		0	-1.02	0	12.5	0	0
379	2	5	2	4	1	13	2	1	3	2	2	1		1		40	1		1	1	0	1	1	0	0	1	1	1	0	0	1	1	1.02629	768	3	2	0	27.5	136.7			-2.6	1	1	-2.18	1	13.1	0	0
380	2	5	1	9	2	12	2	1	3	3	2	1		1	45	40	1	1	0	1	0	1	1	0	0	0	0	1	0	0	0	1	-0.879635	272	1	1	1	47.3	148			-0.47		0	1.23	0	13.2	0	0
381	2	5	1	6	1	12	2	1	3	2	2	1		1	92	88	1	1	1	0	0	1	1	0	0	1	1	1	0	1	1	1	1.16698	808	3	1	1	49	163.1			1.98		0	0.41	0	13.1	0	0
382	2	5	1	6	2	12	2	1	3	2	2	1		1	30	26	1	1	1	1	0	1	1	0	1	1	1	1	0	0	1	1	0.728929	574	2	2	0	37.6	156.4			0.76		0	-1.34	0	13	0	0
383	2	5	1	6	2	13	2	1	3	2	2	1		2	40	35	1	1	0	1	0	0	1	0	0	0	0	1	0	0	0	1	-0.585146	291	2	2	0	34.4	139			-0.9		0	0.24	0	11	1	0
384	2	5	1	7	1	12	2	1	3	2	2	1		1	40	36	1	1	1	1	0	0	1	0	0	1	1	1	0	0	0	1	0.946667	693	3	2	0	37.2	144.1			-0.7		0	0.18	0	13.2	0	0
385	2	5	1	8	2	13	2	1	3	3	2	1		2	40	35	1	1	1	1	0	1	1	0	0	1	1	1	0	0	0	1	0.652178	529	2	2	0	36.7	149.9			0.74		0	-0.44	0	10.9	1	0
386	2	5	1	6	2	11	2	1	3	2	2	1		2	30	26	1	1	1	1	0	0	1	1	1	1	1	1	1	0	0	1	0.446716	443	2	2	0	37.1	154			1.36		0	-0.82	0	12.5	0	0
387	2	5	2	3	1	12	2	1	3	2	2	1		1	30	99	1		0	0	0	0	1	0	0	1	0	1	0	1	0	1	0.309763	390	2	2	0	30.5	135.6			-1.9		0	-0.51	0	9.5	1	0
388	2	5	1	7	2	12	2	1	3	3	2	1		1	30	27	1	1	0	0	0	0	1	0	0	0	0	1	0	0	0	0	-1.18609	180	1	1	0	28.1	138.6			-1.85		0	-1.83	0	12.4	0	0
389	2	5	2	5	1	12	2	1	3	3	2	1		1		35	1		1	0	0	1	1	0	0	0	0	1	0	0	0	0	-1.44927	88	1	2	1	45	160.6			1.63		0	-0.04	0	11.5	1	0
390	2	5	1	8	2	13	2	1	3	2	2	1		1	40	36	1	1	0	1	0	1	1	0	0	0	0	1	0	0	0	0	-1.5136	39	1	2	0	27.5	136.7			-2.83	1	1	-2.15	1	11	1	1
391	2	5	1	5	2	12	2	1	3	2	2	1		1	40	35	1	1	1	0	0	1	1	0	0	1	1	1	0	0	0	1	0.685198	560	2	1	0	40.2	146.7			-0.66		0	0.28	0	12	0	0
392	2	5	1	11	1	12	2	1	3	2	2	1		2	40	36	1	1	0	0	0	1	1	0	0	0	0	1	0	0	0	0	-1.48058	71	1	2	0	27.9	135.5			-1.92		0	-1.41	0	12.7	0	0
393	2	5	2	6	2	12	2	1	3	2	2	1		2	35	28	1		0	1	0	1	1	0	0	1	1	1	0	1	0	0	0.0945741	350	2	1	0	35.1	139.9			-1.66		0	-0.03	0	11.5	1	0
394	2	5	1	8	2	13	2	1	3	2	2	1		1	30	26	1	1	1	1	0	1	1	0	1	1	1	1	0	0	0	1	0.354816	405	2	2	0	27.5	136.7			-2.83	1	1	-2.15	1	10.9	1	1
395	2	5	1	5	1	12	2	1	3	2	2	1		1	30	25	1	1	0	1	0	1	1	0	0	0	0	1	0	0	0	0	-1.5136	39	1	2	0	28	138			-1.56		0	-1.79	0	10.5	1	0
396	2	5	1	12	1	13	2	1	3	2	2	1		2	50	45	1	1	1	0	0	1	1	0	0	1	1	1	1	1	1	1	0.983557	744	3	2	0	27.5	136.7			-2.6	1	1	-2.18	1
397	2	6	2	6	2	14	2	1	2	3	2	1		2		42	1		1	1	0	1	1	1	1	1	1	1	1	0	0	1	0.152227	355	2	2	0	28	135.9			-3.44	2	1	-2.19	1	9.5	1	1
398	2	6	1	6	2	14	2	1	2	3	2	1		2	38	35	2	2	1	1	0	1	1	1	1	1	1	1	1	0	0	1	0.152227	355	2	2	0	43.4	147.4			-1.78		0	0.15	0	12.8	0	0
399	2	6	1	5	2	14	2	1	2	3	2	1		1	50	45	1	1	1	1	1	1	1	1	1	1	1	1	1	1	1	1	0.510365	467	2	2	0	36.6	152.9			-0.99		0	-1.87	0	11.9	1	0
400	2	6	1	9	1	13	2	1	3	2	2	1		2	40	35	1	2	1	1	1	1	1	1	1	1	1	1	1	0	1	1	0.402692	423	2	2	0	31	135			-2.83	1	1	-0.62	0	11.2	1	1
401	2	6	1	5	2	13	2	1	1	2	2	1		2	40	32	1	1	1	1	0	0	1	1	1	1	1	1	1	0	0	1	0.446716	443	2	1	0	41.7	147.8			-1.24		0	0.11	0	11.9	1	0
402	2	6	1	5	1	13	2	1	1	3	2	1		2	32	26	1	1	1	1	0	1	1	1	1	0	0	1	1	0	0	0	-1.98224	1	1	2	0	42	160.7			0.63		0	-1.06	0	9.4	1	0
403	2	6	1	7	2	13	2	1	2	2	2	1		1	35	32	1	2	1	1	0	1	1	0	1	1	1	1	1	0	1	1	0.545503	487	2	2	0	29.1	137.4			-2.73	1	1	-1.69	0	11.1	1	1
404	2	6	1	6	1	13	2	1	2	2	2	1		2	40	32	2	2	0	0	0	0	1	1	1	1	1	1	1	0	1	1	0.822536	626	3	1	0	38.8	149.9			-0.83		0	-0.48	0	9	1	0
405	2	6	1	5	1	14	2	1	1	1	2	1		1	80	50	2	1	1	1	0	0	1	1	1	1	1	1	0	0	1	1	1.00425	752	3	1	0	34.1	145.1			-2.35	1	1	-1.5	0	10.2	1	1
406	2	6	1	7	2	13	2	1	1	1	2	1		2	47	45	1	2	1	1	0	0	1	1	0	1	1	1	0	0	1	1	1.30162	818	3	2	0	32.8	141			-2.21	1	1	-1.06	0	11.9	1	1
407	2	6	1	6	1	13	2	1	2	2	2	1		2	61	56	1	2	0	1	0	0	1	1	1	1	1	0	1	0	0	1	0.330236	400	2	2	1	22	122.9			-4.46	2	1	-2.3	1	12.6	0	0
408	2	6	1	6	1	14	2	1	2	3	2	1		2	49	43	2	1	1	1	0	0	1	1	1	1	1	1	1	0	1	1	0.820828	619	3	2	0	26.9	131.9			-4.07	2	1	-2.01	1
409	2	6	1	7	2	14	2	1	3	3	2	1		2	57	43	2	2	1	1	1	1	1	1	1	1	1	1	1	0	1	1	0.402692	423	2	2	0	31	141			-2.71	1	1	-1.91	0	13.7	0	0
410	2	6	1	6	1	13	2	1	3	3	2	1		2	45	38	1	2	1	1	0	1	1	1	0	1	1	1	1	0	0	1	0.449589	449	2	2	0	42.6	157.1			0.14		0	-0.48	0	11.1	1	0
411	2	6	1	5	1	13	2	1	3	3	2	1		2	47	39	1	1	1	1	0	0	1	0	0	0	0	0	1	0	0	0	-1.45639	86	1	2	0	33	139			-2.29	1	1	-0.58	0	10	1	1
412	2	6	1	5	1	14	2	1	3	2	2	1		2	49	45	1	1	1	1	0	0	1	1	0	1	1	1	0	0	0	1	0.927504	671	3	2	0	36.8	148.4			-1.92		0	-1.17	0
413	2	6	1	6	1	13	2	1	3	3	2	1		2	40	38	1	2	1	0	0	0	1	1	1	1	1	1	1	0	1	1	0.853848	644	3	2	0	47.8	161.4			0.72		0	0.05	0	13.8	0	0
414	2	6	1	4	2	14	2	1	2	2	2	1		2	48	40	2	2	0	1	0	1	1	1	1	1	1	1	1	0	0	1	0.120915	351	2	1	0	58	156.7			-0.44		0	1.23	0	10.1	1	0
415	2	6	1	7	2	13	2	1	2	2	2	1		2	70	66	1	1	0	1	0	1	1	1	0	0	0	1	0	0	0	0	-1.53276	37	1	2	0	53.7	150.2			-0.89		0	1.51	0	13.3	0	0
416	2	6	1	5	2	13	2	1	1	3	2	1		2	60	58	1	1	0	1	0	0	1	1	1	1	1	1	1	0	0	1	0.415404	434	2	2	1	36.3	150.1			-0.9		0	-1.27	0
417	2	6	1	7	2	13	2	1	3	3	2	1		2	90	80	1	1	0	0	0	1	1	1	1	1	1	1	1	0	1	1	0.528047	486	2	2	0	50.4	154.5			-0.27		0	0.8	0
418	2	6	1	7	1	13	2	1	3	2	2	1		2	35	32	1	1	1	0	0	1	1	1	1	1	1	1	1	0	1	1	0.559359	490	2	2	0	33.7	144.2			-1.59		0	-1.1	0	14.6	0	0
419	2	6	1	5	2	14	2	1	2	2	2	1		2	39	32	1	1	0	1	0	1	1	1	0	0	0	0	0	0	0	0	-1.61793	30	1	2	1	38.8	149.9			-1.42		0	-0.99	0	9	1	0
420	2	6	1	5	2	14	2	1	3	3	2	1		2	42	38	2	1	0	1	0	0	1	1	0	0	0	1	0	0	0	0	-1.23827	132	1	2	0	30.3	142.7			-2.46	1	1	-2.37	1	11.5	1	1
421	2	6	1	6	1	14	2	1	3	2	2	1		2	50	42	1	2	0	1	0	0	1	1	0	0	0	1	0	0	0	0	-1.23827	132	1	2	0	39.2	152.9			-1.34		0	-1.14	0	11.5	1	0
422	2	6	1	7	1	14	2	1	3	2	2	1		2	32	28	1	1	0	0	0	1	1	1	0	0	0	1	1	0	0	0	-1.68317	22	1	2	0	27	133			-3.92	2	1	-2.16	1	10.8	1	1
423	2	6	1	7	1	13	2	1	3	3	2	1		2	70	66	1	1	1	1	0	0	1	1	0	0	0	1	0	0	0	0	-1.20696	144	1	2	0	30	132			-3.24	2	1	-0.51	0
424	2	6	1	7	2	14	2	1	3	3	2	1		2	48	40	1	2	0	1	0	1	1	1	1	1	1	1	1	0	0	1	0.120915	351	2	2	0	35.7	141.8			-2.59	1	1	-0.75	0	12.4	0	0
425	2	6	1	5	2	14	2	1	3	3	2	1		2	40	32	2	2	0	1	0	1	1	1	1	1	1	1	1	0	0	1	0.120915	351	2	1	0	38.6	145.9			-2		0	-0.58	0	11.5	1	0
426	2	6	1	7	2	13	2	1	3	3	2	1		2	48	42	1	2	1	1	0	1	1	1	1	1	1	0	0	0	0	1	0.250486	373	2	2	0	41.5	149.3			-1.02		0	-0.07	0	10.8	1	0
427	2	6	1	6	1	14	2	2	2	2	2	1		2	49	40	2	1	1	1	0	0	1	1	1	1	1	1	1	0	1	1	0.820828	619	3	2	0	48.3	160.1			-0.4		0	-0.07	0	12.5	0	0
428	2	6	1	7	1	13	2	1	3	2	2	1		2	80	66	1	1	1	0	0	0	1	1	1	1	1	1	1	0	1	1	0.853848	644	3	2	0	37.2	150.7			-0.72		0	-0.99	0	11.7	1	0
429	2	6	1	6	2	14	2	1	3	2	2	1		2	48	41	1	1	0	1	0	1	1	1	1	1	1	1	0	0	0	1	0.304341	386	2	2	0	52.6	160.5			0.1		0	0.3	0	11.8	1	0
430	2	6	2	7	1	13	2	1	3	3	2	1		1		63	1		1	1	1	1	1	1	1	1	1	1	1	0	1	1	0.402692	423	2	1	0	33.4	141.4			-1.97		0	-0.79	0	10.5	1	0
431	2	6	1	6	2	14	2	1	3	3	2	1		2	45	32	1	2	1	1	0	1	1	1	1	1	1	1	1	0	1	1	0.52634	470	2	2	0	25.4	132.6			-3.92	2	1	-2.68	1	9.5	1	1
432	2	6	1	7	2	14	2	1	3	3	2	1		2	53	47	1	1	1	1	0	1	1	1	1	1	1	1	1	0	1	1	0.52634	470	2	2	0	30.8	144.3			-2.23	1	1	-2.44	1	10.5	1	1
433	4	1	1	8	2	9	1	1	2	2	2	1		2	40	28	1	1	0	1	0	1	1	1	0	1	1	1	0	0	0	0	-0.0322615	332	2	2	0	20	115	-2.27	1	-2.86	1	1	-0.55	0	14.2	0	0
434	4	1	1	6	1	10	2	1	2	2	2	1		2	35	25	2	1	0	1	0	0	1	1	0	0	0	1	0	0	0	0	-1.23827	132	1	2	0	24.7	129	-1.54	0	-1.38		0	-1.06	0	10.4	1	0
435	4	1	1	7	2	8	1	1	2	2	2	1		2	35	22	1	2	0	0	0	0	1	0	0	1	1	1	0	1	1	0	0.796195	610	3	2	0	30	146.1	1.06	0	3.37		0	-1.05	0	10.2	1	0
436	4	1	1	7	1	8	1	1	2	2	2	2	1	2	40	35	1	1	0	0	0	0	1	0	0	0	0	1	0	0	0	0	-1.18609	180	1	2	0	22.7	119	-0.81	0	-1.46		0	0.19	0	10.2	1	0
437	4	1	1	5	2	9	1	1	2	2	2	1		2	30	25	1	1	0	1	0	0	1	1	0	1	1	1	0	0	1	0	0.63634	526	2	2	0	19	116.6	-2.65	1	-2.6	1	1	-1.33	0	13.2	1	1
438	4	1	1	6	1	10	2	2	2	2	2	1		2	30	22	1	1	0	0	0	0	1	0	0	1	1	1	0	0	1	0	0.688522	562	2	2	0	25.3	125.8	-1.37	0	-1.88		0	-0.27	0	13	0	0
439	4	1	1	5	1	10	2	1	2	3	2	1		2	45	30	1	1	0	0	0	0	1	0	0	0	0	1	0	0	0	0	-1.18609	180	1	2	0	25	137.3	-1.46	0	-0.08		0	-2.47	1	13.5	0	0
440	4	1	1	5	1	9	1	1	2	3	2	1		2	30	22	1	2	0	0	0	0	1	0	0	0	0	1	0	0	0	1	-0.552127	298	2	2	0	25	137.3	-0.8	0	0.79		0	-2.23	1	13.5	0	0
441	4	1	2	5	1	10	2	1	2	3	2	1		2	40	28	1	2	0	1	0	0	1	0	0	1	1	1	0	0	0	1	0.915355	668	3	2	0	25	137.3	-1.46	0	-0.08		0	-2.47	1	13.5	0	0
442	4	1	1	8	1	9	1	1	2	2	2	1		2	40	33	1	1	0	1	0	0	1	0	0	1	1	1	0	0	0	0	0.28139	379	2	2	0	22.1	120	-1.71	0	-2.09	1	1	-0.46	0	11.2	1	1
443	4	1	1	11	2	13	2	1	2	2	2	2	1	2	45	35	1	2	0	0	0	1	0	1	1	0	0	1	0	0	0	0	-1.8049	10	1	2	0	43.7	148			-1.21		0	0.42	0	12.6	0	0
444	4	1	1	4	2	10	2	1	2	2	2	1		1	35	25	1	1	0	0	0	0	1	0	0	0	0	1	0	0	0	0	-1.18609	180	1	2	0	24	126.1	-1.79	0	-1.96		0	-0.84	0	12.8	0	0
445	4	1	1	7	2	8	1	1	2	2	2	1		2	25	22	1	2	0	0	0	1	1	0	0	1	1	1	0	0	0	0	0.0199206	343	2	2	0	24.5	129.9	-0.13	0	0.58		0	-0.72	0	11.2	1	0
446	4	1	1	5	2	9	1	1	2	3	2	1		2	35	25	1	1	0	0	0	0	1	0	0	0	0	1	0	0	0	0	-1.18609	180	1	2	0	25	137.3	-0.75	0	0.79		0	-1.9	0	13.5	0	0
447	4	1	1	7	1	10	2	1	2	2	2	1		2	55	40	1	1	0	0	0	0	1	0	0	0	0	1	0	0	0	0	-1.18609	180	1	2	0	24.5	130.6	-1.6	0	-1.13		0	-1.44	0	13.4	0	0
448	4	1	1	6	2	9	1	1	2	3	2	1		2	35	25	1	1	1	1	1	1	1	1	0	1	1	1	0	0	0	0	-0.124598	327	2	2	0	25	137.3	-0.75	0	0.79		0	-1.9	0	13.5	0	0
449	4	1	1	7	1	10	2	1	2	3	2	1		2	35	25	1	2	1	1	0	1	1	0	0	1	1	1	0	0	1	0	0.392326	418	2	2	0	25	137.3	-1.46	0	-0.08		0	-2.47	1	13.5	0	0
450	4	1	1	8	2	11	2	1	2	3	2	1		2	40	30	1	1	0	1	0	0	1	0	0	0	0	1	0	0	0	0	-1.21911	139	1	2	0	37	156			1.66		0	-1.09	0	13.1	0	0
451	4	1	1	7	2	8	1	1	2	2	2	1		2	35	25	1	2	0	1	0	0	1	0	0	1	1	1	0	0	1	0	0.655502	544	2	2	0	20.4	114	-1.34	0	-2.17	1	1	0.01	0	9.2	1	1
452	4	1	1	7	2	9	1	1	2	2	2	1		2	40	35	1	2	1	1	0	0	1	1	0	1	0	1	0	0	1	0	-0.0786326	329	2	2	0	18.3	118.1	-2.94	1	-2.36	1	1	-2.02	1	14.4	0	0
453	4	1	1	8	2	11	2	1	2	2	2	1		2	45	40	1	1	0	0	0	0	1	0	0	0	0	1	0	0	0	0	-1.18609	180	1	2	0	19.6	113.6			-4.72	2	1	-1.1	0	13	0	0
454	4	1	1	6	1	11	2	1	2	2	2	1		2	30	25	1	1	1	1	0	0	1	1	0	1	1	1	0	0	1	0	0.667652	554	2	2	0	19.6	113.6			-4.38	2	1	-1.09	0	13	0	0
455	4	1	1	5	1	9	1	1	2	2	2	1		2		25	1		1	1	0	1	1	1	0	1	1	1	0	0	0	0	-0.000949405	340	2	2	0	27.3	124.4	-0.19	0	-1.36		0	0.87	0	11.3	1	0
456	4	1	1	4	2	10	2	1	2	2	2	1		2	40	30	1	1	0	1	0	1	1	0	0	0	0	1	0	0	1	0	-1.13949	259	1	2	0	25	130	-1.51	0	-1.35		0	-1.03	0	14.2	0	0
457	4	1	1	6	2	10	2	1	2	3	2	1		2	35	20	1	1	0	0	0	0	1	1	0	0	0	1	0	0	1	0	-0.831142	277	1	2	0	20.6	117.2	-2.88	1	-3.35	2	1	-0.9	0	12	0	0
458	4	1	1	6	2	10	2	2	2	2	2	1		2	60	28	1	2	0	1	0	0	1	1	0	1	1	1	0	0	1	1	1.2703	816	3	2	0	22	124.4	-2.4	1	-2.23	1	1	-1.42	0	10.2	1	1
459	4	1	1	11	1	8	1	1	2	3	2	1		1	46	35	1	2	0	1	0	1	1	1	0	1	1	1	1	0	0	1	0.418277	435	2	2	0	21.8	115.3	-1.12	0	-2.12	1	1	0.42	0	13.4	0	0
460	4	1	1	7	1	11	2	1	2	3	2	1		2	35	24	1	1	0	0	0	0	1	0	0	0	0	1	0	0	0	0	-1.18609	180	1	2	0	33.6	145			0.28		0	-0.55	0
461	4	1	1	10	1	9	1	1	2	3	1	1		2	67	47	1	1	0	1	0	1	1	1	1	1	1	1	1	0	1	1	0.495028	462	2	2	0	25	137.3	-0.8	0	0.79		0	-2.23	1	13.5	0	0
462	4	1	1	7	1	9	1	1	2	3	2	1		2	35	27	1	2	0	0	0	0	1	0	0	0	0	1	0	0	0	0	-1.18609	180	1	2	0	25	137.3	-0.8	0	0.79		0	-2.23	1	13.5	0	0
463	4	1	1	8	1	9	1	1	2	3	2	1		2	40	30	1	1	0	0	0	0	1	0	0	0	0	0	0	0	0	0	-1.27126	115	1	2	0	25	137.3	-0.8	0	0.79		0	-2.23	1	13.5	0	0
464	4	1	1	6	1	9	1	1	2	2	2	1		2	35	25	1	1	0	1	0	0	1	0	0	1	1	1	0	0	0	0	0.28139	379	2	2	0	26.8	133	-0.32	0	0.07		0	-0.6	0	13	0	0
465	4	1	1	6	2	7	1	1	2	2	2	1		2	25	20	1	2	0	1	0	1	1	0	0	1	1	1	0	0	1	0	0.361014	411	2	2	0	22.2	124.3	-0.05	0	0.64		0	-0.68	0	13.9	0	0
466	4	1	1	9	2	10	2	1	2	2	2	1		2	40	33	1	1	0	1	0	1	1	0	0	1	1	1	0	0	0	0	-0.0130988	337	2	2	0	25.7	128.3	-1.33	0	-1.62		0	-0.53	0	13	0	0
467	4	1	1	6	2	10	2	1	2	2	2	1		1	40	30	1	2	0	0	0	0	1	0	0	0	0	1	0	0	0	0	-1.18609	180	1	2	0	21	120.4	-2.74	1	-2.85	1	1	-1.23	0	10.7	1	1
468	4	1	1	5	1	10	2	1	2	3	2	1		2	30	25	1	1	0	1	0	0	1	1	0	0	0	1	0	0	0	0	-1.23827	132	1	2	0	25.4	126.5	-1.34	0	-1.77		0	-0.34	0	10.8	0	0
469	4	2	1	7	1	11	2	1	2	3	2	1		2	30	25	1	2	0	1	0	1	1	1	0	1	1	1	0	0	0	0	-0.0322615	332	2	2	0	27.3	124.8			-2.72	1	1	0.3	0	11.6	1	1
470	4	2	1	6	1	10	2	1	2	2	2	1		2	40	24	2	2	0	1	1	1	1	1	1	1	1	1	1	0	1	1	0.37138	414	2	2	0	25.2	129	-1.4	0	-1.38		0	-0.84	0	12.5	0	0
471	4	2	1	5	1	9	1	1	2	3	2	1		2	30	20	1	2	0	0	0	0	1	0	0	1	1	1	0	0	1	0	0.688522	562	2	2	0	40.2	142.7	2.1	0	1.69		0	1.75	0	11.3	1	0
472	4	2	1	5	1	11	2	1	2	2	2	1		2	35	22	1	1	0	0	0	0	1	0	0	1	1	1	0	0	0	0	0.314409	391	2	2	0	40.2	142.7			-0.06		0	1.21	0	13	0	0
473	4	2	1	5	1	10	2	1	2	3	2	1		2	28	20	1	1	0	0	0	0	1	0	0	1	1	1	0	0	1	0	0.688522	562	2	2	0	18	113.6	-3.87	2	-3.79	2	1	-1.8	0	13	0	0
474	4	2	1	6	1	11	2	1	2	2	2	1		2	40	30	1	2	0	0	0	1	1	1	0	1	1	1	0	0	1	0	0.374871	417	2	2	0	27.6	128.4			-2.19	1	1	-0.11	0	11.5	0	0
475	4	2	1	12	1	9	1	1	2	2	2	1		2	50	45	1	1	0	0	0	1	1	0	0	1	0	1	0	1	1	0	-0.244578	319	2	2	0	24	118.7	-1.09	0	-2.31	1	1	0.57	0	10.7	1	1
476	4	2	1	9	1	11	2	1	2	2	2	1		2	45	35	1	2	0	1	0	0	1	0	0	1	1	1	0	0	0	0	0.28139	379	2	2	0	23.2	123.6			-2.9	1	1	-1.09	0	13	0	0
477	4	2	1	6	2	10	2	1	2	2	2	1		2	35	20	1	2	0	0	0	0	1	0	0	0	0	1	0	0	0	0	-1.18609	180	1	2	0	26	126.6	-1.25	0	-1.88		0	-0.2	0	10.5	1	0
478	4	2	1	10	1	12	2	1	2	2	2	1		2	40	30	1	2	0	0	0	1	1	1	0	0	0	1	0	1	0	0	-1.39207	94	1	2	0	29.6	138.1			-1.55		0	-1.18	0	14.3	0	0
479	4	2	1	8	1	12	2	1	2	2	2	2	1	2	42	31	1	1	0	0	0	1	1	1	0	1	1	1	0	0	1	1	1.00884	761	3	2	0	29.8	142.8			-0.89		0	-1.87	0	11.2	1	0
480	4	2	1	10	1	12	2	1	2	2	1	1		2	40	30	1	1	0	0	0	0	1	0	0	0	0	1	0	0	0	0	-1.18609	180	1	2	0	29.4	131.7			-2.45	1	1	-0.3	0	10.4	1	1
481	4	2	1	10	2	13	2	1	2	3	2	1		2	40	32	1	1	0	0	0	0	1	0	0	1	1	1	0	0	0	0	0.314409	391	2	2	0	43	151.3			-0.73		0	-0.01	0	12.2	0	0
482	4	2	1	8	1	13	2	1	2	2	2	2	1	2	40	35	1	1	0	1	0	0	1	1	0	1	1	1	0	0	1	0	0.63634	526	2	2	0	52	162			0.8		0	0.65	0	12.9	0	0
483	4	2	1	10	2	10	2	1	2	2	2	1		2	40	30	1	1	0	1	0	1	1	0	0	1	1	1	0	0	1	0	0.361014	411	2	1	0	26.4	130.7	-1.15	0	-1.24		0	-0.62	0	12.5	0	0
484	4	2	1	5	1	12	2	1	1	2	2	1		2	30	25	1	1	1	1	0	0	1	1	0	0	0	1	0	0	0	0	-1.20696	144	1	2	0	36	139.4			-1.37		0	0.46	0	13	0	0
485	4	2	1	6	1	10	2	1	2	2	2	1		2	30	22	1	1	0	0	0	0	1	0	0	0	0	1	0	0	0	0	-1.18609	180	1	2	0	22.6	119.1	-2.2	1	-2.93	1	1	-0.31	0	13.5	0	0
486	4	2	1	6	1	11	2	1	2	2	2	1		2	30	22	1	1	0	1	0	1	1	1	0	1	1	1	0	0	0	0	-0.0322615	332	2	2	0	25.8	130.9			-1.81		0	-1.18	0	12.9	0	0
487	4	2	1	6	2	9	1	1	2	2	2	1		2	40	30	2	2	0	0	0	0	1	0	0	1	1	1	0	0	0	0	0.314409	391	2	2	0	26.6	129.7	-0.36	0	-0.46		0	-0.15	0	14.4	0	0
488	4	2	1	6	2	10	2	1	2	2	2	2	1	2	40	30	1	1	0	0	0	0	1	0	0	0	0	1	0	0	0	0	-1.18609	180	1	2	0	25.7	122.7	-1.33	0	-2.49	1	1	0.22	0	12.7	0	0
489	4	2	1	5	2	10	2	1	2	3	2	1		2	35	25	1	1	0	0	0	0	1	0	0	1	1	1	0	0	0	0	0.314409	391	2	2	0	36.8	140.5	0.8	0	0.29		0	0.86	0	11.8	0	0
490	4	2	1	9	2	12	2	1	2	2	2	1		2	40	30	1	2	0	0	0	0	1	0	0	1	1	1	0	0	0	0	0.314409	391	2	2	0	42	148.5			-0.4		0	0.41	0	14.1	0	0
491	4	2	1	4	1	11	2	1	2	3	2	1		2	30	25	1	1	0	0	0	0	0	1	0	1	1	1	0	0	0	0	0.287455	383	2	2	0	28	133.1			-1.49		0	-0.67	0	10.3	1	0
492	4	2	1	7	1	11	2	1	2	2	2	1		2	40	30	1	2	0	0	0	0	1	0	0	1	1	1	0	0	1	0	0.688522	562	2	2	0	24	135			-1.21		0	-2.87	1	13.4	0	0
493	4	2	1	6	2	9	1	1	2	2	2	1		1	35	27	2	2	1	1	0	1	1	1	0	1	1	1	1	0	1	0	0.189737	370	2	2	0	29.6	131.7	0.28	0	-0.13		0	0.47	0	14.1	0	0
494	4	2	1	6	2	9	1	1	2	3	2	1		2	40	30	1	2	0	0	0	1	1	0	0	0	0	1	0	0	0	0	-1.48058	71	1	2	0	27	131.9	-0.26	0	-0.1		0	-0.32	0	12.7	0	0
495	4	2	1	5	2	10	2	1	2	1	2	1		2	30	20	1	1	0	0	0	0	1	0	0	0	0	1	0	0	0	0	-1.18609	180	1	2	0	40	148.7	1.23	0	1.57		0	0.65	0	15.2	0	0
496	4	2	1	7	2	10	2	1	2	3	2	2	1	2	30	25	1	2	0	1	0	0	0	0	0	1	1	1	0	0	1	0	0.647711	528	2	2	0	27	127.4	-1.01	0	-1.76		0	0.01	0	14.5	0	0
497	4	2	1	6	1	10	2	1	2	2	1	1		1	30	25	1	2	0	0	0	1	1	0	0	1	1	1	0	0	0	0	0.0199206	343	2	2	0	26	127.3	-1.18	0	-1.64		0	-0.24	0	14	0	0
498	4	2	1	7	1	12	2	1	2	2	1	2	1	2	56	45	1	2	0	1	0	1	1	1	0	0	0	1	0	0	0	1	-0.898797	271	1	2	0	29.2	137.9			-1.58		0	-1.3	0	13.9	0	0
499	4	2	1	6	2	11	2	1	2	3	2	1		2	35	22	1	2	0	0	0	0	1	0	0	1	1	1	0	0	1	0	0.688522	562	2	2	0	27.3	124.8			-3.04	2	1	0.13	0	11.6	0	0
500	4	2	2	6	1	12	2	1	2	3	2	1		2	36	25	1	1	0	0	0	1	1	0	0	0	0	1	0	0	0	0	-1.48058	71	1	2	0	28.5	135.9			-1.86		0	-1.24	0
501	4	2	1	8	2	9	1	1	2	3	2	1		2	35	22	1	2	0	0	0	0	1	0	0	0	0	1	0	0	0	0	-1.18609	180	1	2	0	23	125.3	-1.29	0	-1.18		0	-0.85	0	9.2	1	0
502	4	2	1	7	1	11	2	1	2	3	1	1		2	50	40	1	1	0	1	0	1	1	0	0	1	1	1	1	0	0	0	-0.196525	321	2	2	0	32	142.9			-0.03		0	-0.75	0	10.5	1	0
503	4	2	1	7	2	13	2	1	2	2	2	2	3	2	45	25	1	1	0	1	0	1	1	0	0	0	0	1	0	0	0	0	-1.5136	39	1	2	0	52	154			-0.34		0	1.04	0	9.7	1	0
504	4	2	1	6	2	11	2	1	2	3	2	1		2	30	22	1	1	0	0	0	0	1	0	0	0	0	1	0	0	0	0	-1.18609	180	1	2	0	27.3	124.8			-3.04	2	1	0.13	0	11.6	0	0
505	4	3	1	5	2	10	2	1	2	2	2	1		2	45	35	1	1	0	1	0	1	1	0	0	1	1	1	1	0	1	0	0.177588	368	2	2	0	33.2	141.2	0.24	0	0.4		0	0.02	0	13.9	0	0
506	4	3	1	5	2	11	2	1	2	3	2	1		2	40	30	1	1	1	1	0	0	1	0	0	1	0	1	0	0	0	0	-0.433583	312	2	2	0	28	130			-2.26	1	1	-0.32	0	10.2	1	1
507	4	3	1	8	1	12	2	1	2	3	2	1		2	38	26	1	2	1	1	0	1	1	1	1	1	1	1	0	0	1	0	0.0758012	348	2	2	0	40.3	157.6			1.2		0	-0.72	0	12.2	0	0
508	4	3	2	3	1	13	2	1	2	3	2	1		2		20	1		0	0	0	0	1	0	0	1	1	1	0	0	0	0	0.314409	391	2	2	0	40.3	157.6			0.21		0	-1.09	0	12.2	0	0
509	4	3	1	9	1	13	2	1	2	3	2	1		2	40	35	1	2	0	0	0	0	1	0	0	1	1	1	0	0	1	0	0.688522	562	2	2	0	40	158.1			0.28		0	-1.23	0	11.7	1	0
510	4	3	1	7	1	12	2	1	2	3	2	1		2	35	32	1	1	1	1	0	1	1	0	0	1	1	1	0	0	1	1	1.02629	768	3	2	0	30.7	136.4			-1.79		0	-0.56	0	12.9	0	0
511	4	3	1	8	2	11	2	1	2	2	2	1		2	35	30	1	2	0	0	0	0	1	1	0	1	1	1	0	0	0	0	0.295246	384	2	2	0	27.5	132.9			-1.82		0	-0.87	0	12.4	0	0
512	4	3	1	6	1	8	1	1	2	3	2	1		2	25	22	1	2	0	1	0	1	0	0	0	1	1	1	0	0	0	0	-0.0208902	336	2	2	0	26.2	123.5	0.21	0	-0.67		0	0.86	0	13.2	0	0
513	4	3	1	6	2	9	1	1	2	3	2	1		2	35	28	1	2	0	0	0	1	1	0	0	1	1	1	0	0	0	0	0.0199206	343	2	2	0	24	120.1	-1.01	0	-2.03	1	1	0.27	0	13.9	0	0
514	4	3	1	6	2	13	2	1	2	3	2	1		2	30	22	2	2	0	1	0	0	1	0	0	1	1	1	0	0	1	0	0.655502	544	2	2	0	40.3	157.6			0.18		0	-1.21	0	12.2	0	0
515	4	3	1	6	1	11	2	1	2	2	2	1		2	40	27	1	2	0	0	0	0	1	0	0	0	0	0	0	0	0	0	-1.27126	115	1	2	0	28.7	132.9			-1.52		0	-0.39	0	12.2	0	0
516	4	3	1	5	1	12	2	1	2	3	2	1		2	30	22	1	1	0	0	0	0	1	0	0	1	1	1	0	0	0	0	0.314409	391	2	2	0	40.3	157.6			1.2		0	-0.72	0	12.2	0	0
517	4	3	1	7	1	13	2	1	2	3	2	1		2	30	25	1	1	0	1	0	0	1	0	0	1	1	1	0	0	1	0	0.655502	544	2	2	0	33.7	145.9			-1.37		0	-1.34	0	12.3	0	0
518	4	3	1	9	1	12	2	1	2	3	2	1		2	40	30	2	2	0	1	0	1	1	0	0	0	1	1	0	0	1	0	-0.393203	313	2	2	0	43.3	157.6			1.2		0	-0.05	0
519	4	3	1	7	1	10	2	1	2	3	2	1		2	40	30	1	2	0	0	0	0	1	0	0	0	0	1	0	0	0	0	-1.18609	180	1	2	0	21.7	124.2	-2.51	1	-2.13	1	1	-1.7	0	8.5	1	1
520	4	3	1	7	1	12	2	1	2	3	2	1		2	40	30	1	1	1	0	0	1	1	1	1	1	1	1	1	0	1	0	-0.0746057	330	2	1	0	32.6	144.3			-0.67		0	-1.09	0
521	4	3	1	7	1	10	2	1	2	3	2	1		2	40	36	1	1	1	0	0	0	1	0	0	0	0	1	0	0	0	0	-1.15478	247	1	2	0	24.8	126.1	-1.51	0	-1.83		0	-0.52	0	14.8	0	0
522	4	3	1	5	2	11	2	1	2	3	2	1		2	27	25	2	2	1	1	0	1	1	0	0	1	1	1	0	0	1	0	0.392326	418	2	2	0	22.5	123.5			-3.23	2	1	-1.38	0
523	4	3	1	6	2	12	2	1	2	3	2	1		2	35	25	1	1	0	1	0	1	1	0	0	1	1	1	0	0	0	0	-0.0130988	337	2	2	0	21	127.7			-3.44	2	1	-3.22	1	13.2	0	0
524	4	3	1	11	2	13	2	1	2	3	2	1		2	45	30	1	1	1	1	0	1	1	0	0	1	1	1	0	0	0	0	0.0182134	341	2	2	0	36.7	145.5			-1.57		0	-0.64	0	12.4	0	0
525	4	3	1	7	2	13	2	1	2	3	2	1		2	37	25	1	1	1	0	0	0	1	1	0	0	0	1	0	0	0	0	-1.17394	238	1	2	0	40.3	157.6			0.18		0	-1.21	0	12.2	0	0
526	4	3	1	4	1	13	2	1	2	3	2	1		2	35	27	1	1	0	0	0	0	1	1	0	0	0	1	0	0	0	0	-1.20525	153	1	2	0	40.3	157.6			0.21		0	-1.09	0	12.2	0	0
527	4	3	1	8	1	11	2	2	2	2	2	1		2	45	32	1	1	0	0	0	0	1	1	0	1	1	1	0	0	0	0	0.295246	384	2	2	0	25.4	123.4			-2.93	1	1	-0.14	0	12.6	0	0
528	4	3	1	7	2	12	2	1	2	3	2	1		2	40	30	1	2	0	0	0	0	1	0	0	0	0	1	0	0	0	0	-1.18609	180	1	2	0	26.1	133.1			-2.65	1	1	-1.76	0	14.7	0	0
529	4	3	1	6	1	12	2	1	2	3	2	1		2	35	20	1	2	0	1	0	1	1	0	0	0	0	1	0	0	0	0	-1.5136	39	1	2	0	24.8	132.4			-2.35	1	1	-2.27	1	10.2	1	1
530	4	3	1	6	2	13	2	1	2	3	2	1		2	45	30	1	2	0	1	0	0	1	0	0	1	1	1	0	0	0	0	0.28139	379	2	2	0	40.3	157.6			0.18		0	-1.21	0	12.2	0	0
531	4	3	1	6	1	13	2	1	2	3	2	1		2	40	28	1	1	0	0	0	0	1	0	0	0	0	1	0	0	0	0	-1.18609	180	1	2	0	34	142			-1.89		0	-0.7	0	14.7	0	0
532	4	3	1	7	2	13	2	1	2	2	2	1		2	40	34	1	1	0	1	0	1	1	1	0	1	1	1	0	0	0	0	-0.0322615	332	2	2	0	23.6	124.9			-4.53	2	1	-1.87	0	13.1	0	0
533	4	3	1	9	1	13	2	1	2	3	2	1		2	45	36	1	2	0	0	0	0	1	0	0	1	1	1	0	0	1	0	0.688522	562	2	2	0	40.3	157.6			0.21		0	-1.09	0	12.2	0	0
534	4	3	1	6	1	9	1	1	2	3	2	1		2	40	27	1	2	0	1	0	0	0	1	0	1	1	1	0	1	0	1	0.996073	750	3	2	0	26.5	136.9	-0.39	0	0.72		0	-1.4	0	11.2	1	0
535	4	3	1	7	1	13	2	1	2	2	2	1		2	41	35	2	2	0	0	0	0	1	0	0	0	0	0	0	0	1	1	-0.263181	318	2	2	0	29	135			-2.83	1	1	-1.29	0	11.2	1	1
536	4	3	1	8	2	13	2	1	2	3	2	1		2	40	28	1	2	0	0	0	0	1	0	0	1	1	1	0	0	1	0	0.688522	562	2	2	0	36.7	147			-1.35		0	-0.81	0
537	4	3	1	7	1	13	2	1	2	2	2	1		2	40	28	1	1	0	1	0	1	0	0	0	0	0	1	0	0	0	0	-1.52139	38	1	2	0	30.2	139.7			-2.2	1	1	-1.59	0	11.7	1	1
538	4	3	1	7	2	11	2	1	2	3	2	1		2	35	27	1	2	0	0	0	1	1	0	0	1	1	1	0	0	0	0	0.0199206	343	2	2	0	28.1	139.1			-0.89		0	-1.53	0	12.9	0	0
539	4	3	1	10	1	13	2	1	2	3	2	1		2	40	30	1	2	0	0	0	1	1	0	0	1	1	1	0	0	1	0	0.394033	420	2	2	0	40.3	157.6			0.21		0	-1.09	0	12.2	0	0
540	4	3	1	7	1	13	2	1	2	2	2	1		2	35	23	1	1	0	0	0	1	1	0	0	0	0	1	0	1	0	0	-1.37291	99	1	2	0	34.7	140.2			-2.13	1	1	-0.28	0	10.5	1	1
541	4	4	1	6	1	10	2	1	2	3	2	1		2	36	28	1	2	0	0	0	0	1	0	0	0	0	1	0	0	0	0	-1.18609	180	1	2	0	28	134.9	-0.68	0	-0.45		0	-0.67	0	12	0	0
542	4	4	1	9	1	10	2	1	3	2	2	1		1	46	35	1	2	0	0	0	1	1	1	0	0	0	1	1	0	0	0	-1.68317	22	1	1	0	30	138	-0.24	0	0.03		0	-0.42	0	14	0	0
543	4	4	1	7	1	11	2	1	3	2	2	2	1	1	36	28	1	2	0	1	0	1	0	1	0	0	0	1	0	0	0	0	-1.54055	33	1	1	0	31	142.5			-0.09		0	-1.03	0	9.8	1	0
544	4	4	1	8	2	12	2	1	3	2	2	1		2	30	23	1	2	0	0	0	0	0	0	0	0	0	1	0	0	0	0	-1.19388	166	1	2	0	26.4	129.5			-3.18	2	1	-1.12	0	13.5	0	0
545	4	4	1	7	1	11	2	1	3	2	2	1		2	28	21	1	1	0	0	0	1	0	1	0	0	0	1	0	0	0	0	-1.50753	46	1	2	0	31	142.5			-0.09		0	-1.03	0	9.8	1	0
546	4	4	1	6	1	10	2	1	3	2	2	1		2	30	21	1	1	0	1	0	1	0	1	0	1	1	1	0	0	1	1	0.968025	720	3	2	0	25.8	130.9	-1.23	0	-1.08		0	-0.9	0	11.7	0	0
547	4	4	1	7	1	11	2	1	3	2	2	1		2	40	28	1	1	0	0	0	1	1	1	0	1	1	1	0	1	0	1	0.742396	585	3	2	0	31	142.5			-0.09		0	-1.03	0	9.8	1	0
548	4	4	1	8	2	11	2	1	3	2	2	1		2	38	27	1	1	0	0	0	1	0	1	0	0	0	1	0	0	0	0	-1.50753	46	1	2	0	40.6	151.3			0.95		0	0.22	0	13.2	0	0
549	4	4	1	3	1	12	2	1	2	2	2	2	1	1	40	35	1	1	0	0	0	1	1	1	0	1	1	1	0	0	1	1	1.00884	761	3	2	0	30	132.9			-2.28	1	1	-0.28	0	10.2	1	1
550	4	4	1	6	1	13	2	1	3	2	2	1		2	35	28	1	1	1	0	0	0	1	0	0	0	0	1	0	0	0	0	-1.15478	247	1	2	0	31	147.5			-1.15		0	-2.58	1	9.8	1	0
551	4	4	1	8	1	12	2	1	1	1	2	1		2	35	28	1	1	0	1	0	1	1	1	0	1	1	1	0	0	1	1	0.975816	723	3	2	0	29	133.3			-2.23	1	1	-0.66	0	11.5	1	1
552	4	4	1	10	1	12	2	1	3	2	2	1		2	45	30	1	1	0	1	0	1	1	0	0	1	1	1	0	0	0	1	0.620866	504	2	2	0	31	142.5			-0.93		0	-1.36	0	9.8	1	0
553	4	4	1	5	1	11	2	1	3	2	2	1		2	54	40	1	1	0	0	0	1	0	1	0	1	1	1	0	0	1	1	1.00104	751	3	2	0	31	142.5			-0.09		0	-1.03	0	9.8	1	0
554	4	4	1	3	2	10	2	1	3	3	2	2	1	2	32	28	1	1	1	1	1	1	1	1	0	1	1	1	0	0	1	1	0.88348	658	3	2	0	30	138	-0.35	0	-0.1		0	-0.45	0	14.2	0	0
555	4	4	1	8	2	11	2	1	2	2	2	1		2	40	30	1	2	1	1	0	1	1	1	0	1	1	1	0	0	1	1	1.00713	753	3	2	0	37.2	144			-0.15		0	0.3	0	12.9	0	0
556	4	4	1	8	1	11	2	2	3	2	2	1		2	37	22	1	2	0	1	0	1	1	1	0	1	1	1	0	0	1	1	0.975816	723	3	2	0	28.2	135			-1.21		0	-0.89	0	11.2	1	0
557	4	4	1	9	2	10	2	1	1	3	2	2	1	2	45	32	1	1	0	0	0	0	1	0	0	1	1	0	0	0	0	1	0.863207	651	3	2	0	31.2	145.5	-0.12	0	1.07		0	-1.07	0
558	4	4	1	4	1	11	2	1	2	2	2	2	1	2	35	26	1	1	0	0	0	1	1	0	0	0	0	1	0	0	0	0	-1.48058	71	1	2	0	55.3	171.5			4.22		0	0.86	0	11.2	1	0
559	4	4	1	7	1	10	2	1	1	3	2	1		2	34	26	1	2	0	1	0	1	1	1	0	1	1	1	0	0	0	1	0.601704	500	2	2	0	27.3	132.4	-0.85	0	-0.84		0	-0.54	0	10.7	1	0
560	4	4	1	8	2	10	2	1	3	2	2	2	1	2	39	27	1	1	1	1	0	0	1	1	0	1	1	1	0	0	0	1	0.927504	671	3	2	0	20.4	116	-2.96	1	-3.54	2	1	-0.8	0	8.3	1	1
561	4	4	1	6	1	13	2	2	3	3	2	1		2	99	99	1	1	0	0	0	0	0	0	0	0	0	1	0	0	0	0	-1.19388	166	1	2	0	25	120			-4.85	2	1	-0.43	0
562	4	4	2	4	1	12	2	1	3	3	2	2	1	2	99	35	1		0	0	0	0	1	0	0	1	1	1	0	0	0	1	0.948374	704	3	2	0	28.9	131			-2.55	1	1	-0.36	0	13.3	0	0
563	4	4	1	7	1	11	2	1	3	1	2	2	1	2	45	30	1	1	0	1	0	0	1	0	0	0	0	1	0	0	0	0	-1.21911	139	1	2	0	26	130			-1.95		0	-0.95	0	12.2	0	0
564	4	4	1	8	1	12	2	1	1	2	2	1		2	40	30	1	2	0	0	0	1	1	1	1	1	1	1	0	0	0	1	0.337361	403	2	2	0	34.6	144.5			-0.65		0	-0.52	0	10.7	1	0
565	4	4	1	6	1	11	2	1	3	2	2	1		2	32	26	1	1	0	0	0	0	1	0	0	0	0	1	0	0	0	0	-1.18609	180	1	2	0	31	142.5			-0.09		0	-1.03	0	9.8	1	0
566	4	4	1	10	2	12	2	1	3	2	2	1		1	43	31	1	2	0	1	0	1	1	1	1	1	1	1	1	1	1	1	0.602701	502	2	1	0	38.4	149.9			-0.19		0	-0.41	0	13.3	0	0
567	4	4	1	6	2	12	2	1	3	2	2	1		2	40	30	1	2	0	0	0	0	1	0	0	1	1	1	0	0	1	1	1.32249	844	3	1	0	39	149.1			-0.31		0	-0.2	0	13.4	0	0
568	4	4	1	4	2	11	2	1	3	2	2	1		2		60	1		0	0	0	0	1	0	0	1	1	1	0	1	0	1	1.05605	789	3	2	0	32.2	147.4			0.36		0	-1.33	0	14.6	0	0
569	4	4	1	6	2	12	2	1	3	3	2	1		2	36	25	1	2	0	0	0	1	1	1	0	1	1	1	0	0	0	1	0.634723	522	2	2	0	38	148			-0.47		0	-0.29	0	13.3	0	0
570	4	4	1	8	1	12	2	2	2	2	2	1		1	38	26	1	1	0	0	0	0	1	0	0	0	0	1	0	0	0	0	-1.18609	180	1	2	0	29.5	137			-1.7		0	-1.05	0	14.2	0	0
571	4	4	1	9	1	10	2	1	3	2	2	1		2	43	32	1	2	0	1	0	1	1	1	0	1	1	1	0	1	1	1	1.08349	795	3	2	0	28	131.9	-0.68	0	-0.92		0	-0.21	0	13.9	0	0
572	4	4	2	4	1	12	2	1	2	2	2	1		2		28	1		0	0	0	0	1	1	0	1	1	1	0	0	0	1	0.929211	684	3	2	0	25	130			-2.69	1	1	-1.72	0	13.9	0	0
573	4	4	2	5	1	12	2	1	3	2	2	2	1	2		35	1		0	1	0	0	1	1	0	1	1	1	1	0	1	1	1.08688	798	3	2	0	27.3	129.9			-2.71	1	1	-0.75	0	12.2	0	0
574	4	4	1	6	1	10	2	1	3	2	2	2	1	2	34	28	1	1	0	0	0	0	0	0	0	0	0	1	0	0	0	0	-1.19388	166	1	2	0	43.3	153.1	1.81	0	2.4		0	1	0	10.4	1	0
575	4	4	1	7	1	10	2	1	3	2	2	1		2	34	28	1	1	0	0	0	0	0	0	0	0	0	1	0	0	0	0	-1.19388	166	1	2	0	28.6	130	-0.54	0	-1.22		0	0.27	0	13.9	0	0
576	4	4	1	7	2	12	2	1	3	2	1	2	1	2	38	24	1	2	0	1	0	0	1	0	0	0	0	1	0	0	0	0	-1.21911	139	1	2	0	34.3	145.3			-0.87		0	-0.84	0	10.8	1	0
577	4	5	1	5	2	13	2	1	1	3	2	1		2	34	28	1	2	1	1	0	1	0	1	0	1	1	1	0	0	0	1	0.625224	508	2	2	0	51.7	153.6			-0.4		0	1.03	0	13	0	0
578	4	5	1	7	2	12	2	1	2	2	2	1		2	40	31	1	1	1	1	0	1	0	1	0	1	1	1	0	1	1	1	1.10701	800	3	2	0	36.4	145.5			-0.84		0	-0.36	0	15.9	0	0
579	4	5	1	7	1	13	2	1	2	2	2	1		2	34	26	1	1	1	0	1	0	1	0	0	0	0	1	0	0	0	0	-1.27843	114	1	2	0	38.3	151.4			-0.63		0	-0.79	0	13.1	0	0
580	4	5	1	5	1	13	2	1	2	2	2	1		2	45	31	1	2	1	1	0	1	0	1	0	1	1	1	0	0	0	1	0.625224	508	2	2	0	31.2	134.1			-2.95	1	1	-0.44	0	12.4	0	0
581	4	5	1	7	1	12	2	1	3	2	2	1		2	41	32	1	2	1	1	1	0	0	1	0	1	1	1	0	0	1	1	1.17018	809	3	2	0	47.6	162			1.82		0	0.29	0	11.2	1	0
582	4	5	1	4	1	13	2	1	3	2	2	1		2	38	21	1	1	0	1	0	1	0	1	1	1	1	1	1	1	1	1	0.594909	496	2	2	0	33.1	134.7			-2.87	1	1	0	0	13.8	0	0
583	4	5	1	7	2	13	2	2	3	2	2	1		1	42	32	1	1	0	0	0	1	1	1	0	0	0	1	0	0	0	0	-1.49974	55	1	2	0	32.4	135			-3.08	2	1	-0.43	0	12.9	0	0
584	4	5	1	6	2	13	2	1	2	2	2	1		1	40	35	1	1	0	0	0	0	1	1	0	1	1	1	0	0	1	0	0.669359	555	2	1	0	31.8	141.4			-2.16	1	1	-1.39	0	14	0	0
585	4	5	2	4	2	13	2	1	2	2	2	1		2		41	1		0	0	0	0	1	1	0	0	0	1	0	0	0	0	-1.20525	153	1	2	0	46	155.2			-0.17		0	0.12	0	14.9	0	0
586	4	5	1	5	1	14	2	1	3	2	2	2	1	2		28	1		0	0	0	0	1	1	0	0	0	1	0	0	0	0	-1.20525	153	1	2	0	48.4	165			0.24		0	-0.58	0	15.8	0	0
587	4	5	1	8	2	13	2	2	3	2	2	1		2	40	32	1	1	0	0	0	0	1	0	0	0	0	1	0	0	0	0	-1.18609	180	1	2	0	34	148.2			-1.18		0	-1.65	0	15.4	0	0
588	4	5	1	8	2	13	2	1	3	2	2	1		2	35	22	1	1	0	1	0	1	1	1	0	1	1	1	0	0	1	1	0.975816	723	3	2	0	35.9	142.7			-1.97		0	-0.5	0	15.7	0	0
589	4	5	1	5	1	13	2	1	3	3	2	1		2	40	30	1	1	0	0	0	0	1	1	0	1	1	1	0	0	0	1	0.929211	684	3	2	0	32.8	149.8			-0.84		0	-2.26	1	13.6	0	0
590	4	5	1	5	1	13	2	1	3	2	2	1		2	38	30	1	1	0	0	0	0	1	1	0	0	0	1	0	0	0	0	-1.20525	153	1	2	0	33.4	140.7			-2.07	1	1	-0.7	0	13.3	0	0
591	4	5	1	11	2	13	2	1	2	2	2	1		2	46	37	1	1	0	0	0	0	1	0	0	0	0	1	1	0	0	0	-1.36952	104	1	2	0	49.7	147.5			-1.28		0	1.28	0	14.6	0	0
592	4	5	1	4	2	13	2	1	2	2	2	1		2	45	30	1	2	0	1	0	1	0	1	0	1	1	1	1	1	1	1	0.892271	662	3	2	0	46.5	154			-0.34		0	0.3	0	12.5	0	0
593	4	5	1	8	2	13	2	1	3	2	1	1		2	33	25	1	1	0	1	0	1	1	1	0	0	0	1	1	0	0	0	-1.71619	18	1	1	0	29.1	141.5			-2.14	1	1	-2.28	1	13.8	0	0
594	4	5	1	9	2	13	2	1	2	2	2	1		2	35	27	1	2	0	1	0	1	1	1	0	1	1	1	1	1	1	1	0.900063	665	3	2	0	36.3	140.9			-2.23	1	1	-0.21	0	13.9	0	0
595	4	5	1	5	1	13	2	1	3	2	2	1		2	31	25	1	2	0	0	0	1	1	0	0	0	0	1	0	1	0	0	-1.37291	99	1	2	0	28.4	134.3			-2.93	1	1	-1.4	0	13.9	0	0
596	4	5	1	8	1	13	2	1	3	2	2	1		2	35	23	1	1	0	0	0	1	1	0	0	0	0	1	0	1	0	0	-1.37291	99	1	2	0	24.4	133.4			-3.05	2	1	-3.08	1	12.7	0	0
597	4	5	2	5	1	13	2	1	2	2	2	1		2		31	1		0	1	0	1	1	1	1	1	1	1	0	0	1	1	0.678454	558	2	2	0	50.6	159			0.4		0	0.72	0	14.1	0	0
599	4	5	2	6	2	13	2	1	3	2	2	1		2		25	1		0	0	0	1	1	0	0	0	0	1	0	1	0	0	-1.37291	99	1	2	0	31.8	137.3			-2.75	1	1	-0.87	0	14.1	0	0
600	4	5	2	13	2	13	2	1	2	2	2	1		2	40	30	1	1	0	0	0	0	1	1	0	1	1	1	0	0	0	1	0.929211	684	3	2	0	44.8	151.7			-0.67		0	0.25	0	13.8	0	0
601	4	5	1	3	1	14	2	1	2	2	2	1		2	36	27	1	1	0	0	0	0	1	0	0	0	0	1	0	0	0	0	-1.18609	180	1	2	0	31.2	134.1			-3.78	2	1	-0.81	0
602	4	5	1	6	1	13	2	1	2	3	2	2	1	2	35	28	1	2	0	0	0	0	1	1	0	0	0	0	1	0	0	0	-1.47385	81	1	2	0	32.7	140.9			-2.04	1	1	-0.93	0	12.1	0	0
603	4	5	1	8	1	12	2	1	2	2	2	1		2	40	30	1	1	0	1	0	0	1	1	0	1	1	1	0	0	1	1	1.2703	816	3	2	0	29.8	133.6			-2.18	1	1	-0.44	0	15.1	0	0
604	4	5	1	9	1	13	2	1	2	2	2	1		2	39	29	1	1	0	0	0	0	1	0	0	0	0	1	0	1	0	0	-1.07842	264	1	2	0	31.2	134.1			-2.95	1	1	-0.44	0	12.4	0	0
605	4	5	1	3	2	13	2	2	3	2	2	2	1	2	99			1	0	0	0	0	0	1	1	1	1	0	0	0	1	1	0.913003	667	3	2	0	52.7	155			-0.2		0	1.04	0	14	0	0
606	4	5	1	6	1	13	2	1	2	2	2	1		2	35	21	1	1	0	0	0	0	1	0	0	0	0	1	0	1	0	0	-1.07842	264	1	2	0	40.1	147.5			-1.15		0	0.09	0	14.6	0	0
607	4	5	1	8	1	13	2	1	3	3	2	2	1	2	36	28	1	1	0	0	0	0	0	0	0	0	0	1	0	0	0	0	-1.19388	166	1	1	0	44.2	163			0.94		0	-0.83	0	13.5	0	0
608	4	5	1	7	2	13	2	1	3	2	2	1		2	40	27	1	1	0	0	0	0	1	0	0	0	0	1	0	0	0	0	-1.18609	180	1	2	0	43.5	153.1			-0.47		0	-0.1	0	14.8	0	0
609	4	5	1	7	2	13	2	1	2	2	2	1		2	40	30	1	2	0	1	0	1	1	1	0	1	1	1	0	0	1	1	0.975816	723	3	2	0	47.1	153.5			-0.41		0	0.44	0	13	0	0
610	4	5	1	3	2	13	2	1	3	2	2	1		2	40	30	1	1	0	0	0	1	1	1	0	1	1	1	0	0	1	1	1.00884	761	3	2	0	33.1	139.7			-2.4	1	1	-0.82	0	13.1	0	0
611	4	5	1	12	2	13	2	1	2	2	2	1		2	45	30	1	1	0	0	0	0	1	1	0	1	1	1	0	0	1	1	1.30332	827	3	2	0	43.1	148.5			-1.13		0	0.28	0	11.2	1	0
612	4	5	1	7	2	13	2	1	3	2	2	2	1	2	35	28	1	2	1	1	0	1	1	1	0	1	1	1	0	0	1	1	1.00713	753	3	1	0	35.4	155			-0.2		0	-2.14	1	13	0	0
613	4	6	1	8	2	13	2	1	2	2	1	1		2	40	30	2	2	0	0	0	1	1	1	0	0	0	1	1	0	0	0	-1.68317	22	1	1	0	47	158.9			0.36		0	-0.07	0	13.3	0	0
614	4	6	1	6	1	14	2	1	3	2	2	1		2	57	34	1	2	0	0	0	1	1	1	0	1	1	1	0	0	0	1	0.634723	522	2	2	0	24	124.7			-5	2	1	-2.03	1	15.9	0	0
615	4	6	2	3	2	14	2	2	3	2	2	1		2		36	1		0	0	0	1	1	0	0	0	0	1	0	0	0	0	-1.48058	71	1	1	0	45.4	149.6			-1.47		0	0.26	0	13.4	0	0
616	4	6	1	10	2	14	2	1	3	2	1	1		2	48	35	1	1	0	1	0	1	1	1	0	1	1	1	0	0	1	1	0.975816	723	3	1	0	43.8	149.6			-1.47		0	0	0	13.4	0	0
617	4	6	1	7	2	14	2	2	3	2	2	1		2	45	32	1	2	0	1	0	1	1	1	0	1	1	1	0	0	1	1	0.975816	723	3	2	0	45.5	161.5			0.25		0	-0.9	0	11.7	1	0
618	4	6	2	3	2	14	2	1	2	3	2	1		2	45	35	1	1	0	0	0	0	1	0	0	0	0	1	0	0	0	0	-1.18609	180	1	2	0	40.4	158.3			-0.21		0	-1.59	0	14.5	0	0
619	4	6	2	3	2	14	2	1	2	3	2	1		2		45	1		0	0	0	0	0	1	0	1	1	1	0	1	1	1	1.40321	859	3	1	0	43.9	159.3			-0.07		0	-0.97	0	14.6	0	0
620	4	6	1	9	2	14	2	1	3	3	2	1		2	40	28	1	1	0	1	0	1	1	1	0	1	1	1	1	1	1	1	0.900063	665	3	2	0	41.6	161.5			0.25		0	-1.69	0	15.8	0	0
621	4	6	1	3	2	14	2	2	3	3	2	2	1	2	30	99	1	2	0	0	0	1	1	1	0	1	1	1	0	0	0	1	0.634723	522	2	2	0	33	142.2			-2.53	1	1	-1.48	0	14.8	0	0
622	4	6	1	9	2	13	2	1	3	2	2	1		2	42	30	1	1	0	1	0	1	0	1	0	1	1	1	0	0	0	1	0.593912	495	2	2	0	53.8	152.7			-0.53		0	1.33	0	15.1	0	0
623	4	6	1	8	1	14	2	1	3	2	2	1		1	44	30	1	1	0	0	0	1	1	1	0	0	0	1	0	0	0	0	-1.49974	55	1	2	0	32.8	137.7			-3.31	2	1	-0.83	0	13.2	0	0
624	4	6	1	6	2	13	2	1	3	2	2	2	1	2	35	27	1	2	0	1	0	0	1	1	0	0	0	1	0	0	0	0	-1.23827	132	1	2	0	49.2	155.3			-0.15		0	0.58	0	15.7	0	0
625	4	6	1	5	2	13	2	1	2	2	2	2	1	2		30	1		0	1	0	0	1	1	0	1	1	1	1	0	1	1	1.08688	798	3	2	0	46.2	151.4			-0.72		0	0.49	0	14.2	0	0
626	4	6	1	9	1	13	2	1	2	2	2	2	1	2	42	31	1	2	1	0	0	1	1	0	0	1	1	1	1	0	1	1	0.875884	656	3	2	0	40.2	148.6			-1		0	-0.01	0	11.2	1	0
627	4	6	1	8	1	14	2	1	2	2	2	2	1	1	41	29	1	2	0	0	0	0	1	0	0	0	0	1	0	0	0	0	-1.18609	180	1	2	0	28.4	137.5			-3.34	2	1	-2.35	1	12.4	0	0
628	4	6	1	7	2	14	2	1	3	2	2	1		2	42	30	1	2	0	0	0	0	1	1	0	0	0	1	0	0	0	0	-1.20525	153	1	2	0	30.5	141.1			-2.69	1	1	-2.08	1	10.2	1	1
629	4	6	1	9	1	13	2	1	3	2	2	1		2	38	25	1	1	0	1	0	1	1	0	0	1	1	1	0	0	0	1	0.620866	504	2	2	0	42	156.1			0.01		0	-0.5	0	14.2	0	0
630	4	6	1	7	1	13	2	1	1	2	2	2	1	2	45	30	1	2	0	0	0	1	1	1	0	1	1	1	1	0	1	1	0.82541	632	3	2	0	42.8	154.4			-0.22		0	-0.13	0	12.2	0	0
631	4	6	1	5	2	13	2	1	3	2	2	1		2	45	30	1	1	0	0	0	0	0	0	0	0	0	1	0	0	0	0	-1.19388	166	1	2	0	39.2	149.3			-1.02		0	-0.52	0	15.2	0	0
632	4	6	1	8	2	13	2	1	2	2	2	1		2	34	28	1	2	0	0	0	1	0	0	0	0	0	1	0	0	0	0	-1.48837	59	1	2	0	29.3	134.7			-3.12	2	1	-1.25	0	12.2	0	0
633	4	6	2	5	2	13	2	1	1	3	2	1		2		49	1		1	1	1	1	1	1	0	1	1	1	0	0	0	1	0.509367	465	2	2	0	49.6	155.4			-0.14		0	0.62	0	13.7	0	0
634	4	6	2	5	2	13	2	1	2	2	2	1		2		40	1		0	1	0	1	1	0	0	1	1	1	0	0	1	1	0.994979	749	3	2	0	52.1	162.7			0.91		0	0.33	0	14.2	0	0
635	4	6	1	4	2	13	2	1	2	3	2	1		2	65	50	1	1	0	1	0	1	1	0	0	1	1	1	0	0	0	1	0.620866	504	2	2	0	46.3	150.3			-0.88		0	0.61	0	13.7	0	0
636	4	6	1	6	1	13	2	1	2	2	2	2	1	1	40	30	1	2	1	1	1	1	1	1	0	1	1	1	1	1	0	1	0.433614	437	2	2	0	38.4	142.5			-1.82		0	0.3	0	11.2	1	0
637	4	6	1	8	1	13	2	1	3	2	2	1		2	40	30	1	2	1	1	0	0	1	1	0	1	1	1	0	1	0	1	1.03518	780	3	2	0	54.3	167.1			1.49		0	0.51	0	16.1	0	0
638	4	6	1	8	1	14	2	1	1	2	2	1		2	50	40	1	1	0	0	0	0	1	1	0	1	1	1	0	0	1	1	1.30332	827	3	1	0	28.1	139.8			-3.04	2	1	-2.89	1	13.7	0	0
639	4	6	1	8	2	14	2	1	2	3	2	1		2	99	99	1	2	0	0	0	1	1	1	0	1	1	1	1	0	0	1	0.451297	456	2	2	0	42.7	146.3			-1.94		0	0.14	0	14.9	0	0
640	4	6	1	8	1	14	2	2	3	2	1	1		2	37	24	1	2	0	1	0	1	1	1	0	1	1	1	0	1	1	1	1.08349	795	3	2	0	45.4	147.6			-2.03	1	1	0.7	0	13.4	0	0
641	4	6	1	5	1	14	2	1	2	1	2	1		2	34	29	1	2	0	1	0	1	1	1	0	1	1	1	0	1	1	1	1.08349	795	3	2	0	37	145.2			-2.34	1	1	-0.7	0	10.2	1	1
642	4	6	1	5	1	14	2	2	3	2	2	1		2	46	35	1	2	0	1	0	1	1	0	0	1	1	1	1	1	1	1	0.919226	669	3	1	0	45.4	149.6			-1.77		0	0.51	0	13.4	0	0
643	4	6	1	8	1	14	2	2	3	2	2	1		2	32	25	1	1	0	1	0	1	0	1	1	1	1	1	1	1	1	1	0.594909	496	2	2	0	45.4	147.6			-2.03	1	1	0.7	0	13.4	0	0
644	4	6	1	10	1	14	2	2	3	2	2	1		2		38	1		0	1	0	1	1	0	0	0	0	1	0	0	0	0	-1.5136	39	1	2	0	45.4	147.6			-2.03	1	1	0.7	0	13.4	0	0
645	4	6	2	6	1	14	2	2	3	2	2	2	1	2		28	1		0	0	0	0	1	1	0	1	1	1	0	0	0	1	0.929211	684	3	2	0	45.4	149.6			-1.77		0	0.51	0	13.4	0	0
646	4	6	1	9	1	14	2	2	3	2	2	1		1	35	28	1	2	0	0	0	1	1	1	0	1	1	1	0	0	0	1	0.634723	522	2	2	0	45.4	147.6			-2.03	1	1	0.7	0	13.4	0	0
647	4	6	1	9	2	14	2	2	3	1	2	2	1	2	40	31	1	1	0	0	0	0	0	1	0	1	1	1	0	0	0	1	0.92142	670	3	2	0	55.3	164.6			0.69		0	0.3	0	12.2	0	0
648	4	6	2	6	1	13	2	2	2	2	2	1		2		40	1		0	0	0	0	1	0	0	0	0	1	0	0	0	0	-1.18609	180	1	2	0	50.8	166.7			1.43		0	0.02	0	12.7	0	0
649	3	1	2	5	2	8	1	1	3	3	2	1		1	35	99	1		1	0	0	0	1	0	0	0	0	0	0	0	0	0	-1.23995	129	1	2	0	24.8	125.5	-0.06	0	-0.18		0	0.04	0	12.7	0	0
650	3	1	1	6	1	12	2	2	2	3	2	1		2	35	30	1	2	1	1	0	0	1	1	1	1	1	1	1	1	1	1	0.928501	682	3	2	0	28.7	140.7			-1.18		0	-1.96	0	11.8	0	0
651	3	1	1	9	1	8	1	1	1	3	2	1		2	30	28	1	1	1	1	0	1	1	1	0	1	1	1	0	1	1	1	1.1148	802	3	1	0	25.5	130.8	0.02	0	0.63		0	-0.59	0	13.6	0	0
652	3	1	1	4	2	9	1	1	3	3	2	1		2	65	50	1	1	1	0	0	0	1	1	0	1	1	0	1	0	0	1	0.69193	570	2	2	0	24.9	130.6	-0.77	0	-0.31		0	-0.89	0	10.2	1	0
653	3	1	1	4	1	10	2	1	3	3	2	1		2	35	29	1	1	1	1	0	0	1	1	1	1	1	1	1	0	1	1	0.820828	619	3	2	0	22	125.1	-2.41	1	-1.99		0	-1.71	0	11.8	0	0
654	3	1	1	4	1	7	1	1	2	3	2	2	3	1	40	30	1	1	1	1	0	0	1	1	0	0	0	1	0	0	0	0	-1.20696	144	1	2	1	20	113	-1.01	0	-1.65		0	0.13	0	9.6	1	0
655	3	1	1	5	1	10	2	2	2	3	2	1		2	50	45	1	1	1	1	0	1	1	1	1	1	1	1	1	0	1	1	0.52634	470	2	1	0	21.6	127.5	-2.55	1	-1.61		0	-2.44	1	10.5	1	0
656	3	1	1	7	1	12	2	2	1	2	2	2	3	1	36	32	1	1	0	0	0	0	1	0	0	0	0	0	0	0	0	0	-1.27126	115	1	2	1	22.4	121.4			-3.91	2	1	-1.41	0
657	3	1	1	10	1	10	2	1	3	2	2	1		1	50	45	1	2	0	0	0	0	1	0	0	0	0	0	0	0	0	0	-1.27126	115	1	2	1	22.4	121.4	-2.27	1	-2.57	1	1	-0.8	0
658	3	1	1	5	2	10	2	1	3	3	2	1		1	35	30	1	2	0	1	0	0	1	1	0	0	0	0	0	1	0	0	-1.21577	143	1	2	0	24	124	-1.79	0	-2.29	1	1	-0.53	0
659	3	1	1	5	2	8	1	1	3	2	1	2	3	1	35	26	1	1	1	1	0	0	1	1	0	0	0	0	0	0	0	0	-1.29213	108	1	2	0	21.4	134	-1.01	0	1.28		0	-2.96	1	10.2	1	0
660	3	1	1	7	2	13	2	1	1	3	1	1		1	35	28	1	2	1	0	0	1	1	1	1	1	0	1	0	1	0	1	-0.269939	317	2	2	0	38.6	152.5			-0.56		0	-1.01	0	15.6	0	0
661	3	1	1	6	2	8	1	1	1	3	2	1		1	55	45	1	2	1	1	0	0	1	1	0	1	1	0	0	1	0	1	0.95001	712	3	2	0	28.9	145.3	0.85	0	3.23		0	-1.32	0
662	3	1	1	7	1	10	2	1	2	3	2	1		2	35	30	1	2	1	1	0	1	1	1	1	1	1	0	0	0	0	1	0.250486	373	2	2	0	31	137.6	-0.03	0	-0.03		0	-0.04	0	10.6	1	0
663	3	1	1	6	2	12	2	1	3	3	2	1		1	35	30	1	1	0	0	0	0	1	0	0	0	0	0	0	0	0	1	-0.637294	286	1	2	0	24.6	130.5			-3.03	2	1	-1.96	0	10.5	1	1
664	3	1	1	7	1	9	1	1	2	3	2	1		1	55	45	1	1	0	0	0	0	1	1	0	1	1	1	0	0	0	1	0.929211	684	3	2	0	25.5	133.9	-0.66	0	0.22		0	-1.33	0	10.5	1	0
665	3	1	1	8	2	8	1	1	1	3	2	2	1	1	47	32	1	2	0	0	0	0	1	1	1	1	0	1	1	0	1	1	0.0762514	349	2	1	0	21	121.5	-1.14	0	-0.87		0	-0.92	0
666	3	1	1	7	1	10	2	1	3	3	2	1		2		30	1		1	1	1	1	1	1	1	1	1	1	1	0	1	1	0.402692	423	2	2	0	23.2	128.4	-2	0	-1.47		0	-1.69	0	13.4	0	0
667	3	1	1	7	2	10	2	1	3	3	2	1		1	30	25	1	1	1	0	0	0	1	0	0	0	0	0	0	1	0	0	-1.13227	260	1	2	1	25	129.3	-1.51	0	-1.46		0	-0.93	0	12.2	0	0
668	3	1	1	9	1	9	1	1	1	3	2	1		1	40	32	1	1	1	1	0	1	1	1	0	1	1	1	0	0	1	1	1.00713	753	3	2	0	27.4	131.3	-0.17	0	-0.21		0	-0.1	0	12.8	0	0
669	3	1	1	5	1	8	1	1	1	1	2	1		1	23	20	1	2	1	0	0	0	1	1	1	1	1	0	0	0	0	1	0.577994	494	2	2	0	25.2	125.4	-0.06	0	-0.33		0	0.19	0
670	3	1	1	5	1	9	1	1	3	3	2	1		1	30	28	1	1	1	1	0	0	1	1	0	0	0	0	0	1	0	0	-1.18446	233	1	2	0	23.3	123.3	-1.31	0	-1.54		0	-0.48	0	11	1	0
671	3	1	1	6	1	8	1	1	3	2	2	1		2	35	30	1	1	0	0	0	0	1	1	0	1	1	1	1	1	0	1	0.853458	643	3	2	0	20.4	122.4	-1.63	0	-0.86		0	-1.69	0	12.8	0	0
672	3	1	1	7	1	7	1	1	3	3	2	1		1	45	35	1	1	1	1	0	0	1	1	1	1	1	1	1	1	0	1	0.554388	488	2	2	0	19	119.6	-1.41	0	-0.4		0	-1.86	0	9.5	1	0
673	3	1	1	6	2	13	2	1	1	3	2	1		2	40	30	1	2	0	1	0	0	1	1	0	1	0	1	0	1	0	1	0.25758	376	2	2	0	38.6	152.5			-0.56		0	-1.01	0	15.6	0	0
674	3	1	1	5	2	8	1	1	1	3	2	1		1	38	32	1	1	1	1	0	0	1	1	0	0	0	0	0	1	0	0	-1.18446	233	1	2	0	21.4	118.7	-1.01	0	-1.36		0	-0.29	0	11.8	0	0
675	3	1	1	5	2	10	2	1	3	3	2	1		1	35	30	1	2	0	0	0	0	1	1	0	0	0	0	0	1	0	0	-1.18275	236	1	2	0	24.7	128.1	-1.59	0	-1.65		0	-0.86	0
676	3	1	1	6	2	8	1	1	2	3	2	1		2	50	45	1	1	0	0	0	0	1	1	0	1	1	0	0	0	0	1	0.844044	642	3	2	0	21	124.7	-1.14	0	-0.32		0	-1.47	0	11.4	1	0
677	3	1	2	4	1	8	1	1	3	3	2	1		1		30	1		1	0	0	0	1	0	0	1	1	1	1	0	0	1	0.79626	611	3	2	1	22	125.2	-1.05	0	-0.37		0	-1.31	0	13.8	0	0
678	3	1	1	5	2	7	1	1	2	2	2	1		1	35	32	1	1	0	0	0	0	1	0	0	0	0	0	0	1	0	0	-1.16359	244	1	2	1	20.1	116.9	-0.71	0	-0.72		0	-0.44	0	10.5	1	0
679	3	1	1	4	2	13	2	1	1	3	2	1		1	30	28	1	2	1	1	0	0	1	1	0	1	1	0	1	0	0	1	0.658911	547	2	2	0	38.6	152.5			-0.56		0	-1.01	0	15.6	0	0
680	3	1	2	8	2	13	2	1	1	3	2	1		1	35	30	1	1	1	1	0	1	1	0	0	1	1	1	1	1	0	1	0.576425	493	2	2	0	38.6	152.5			-0.56		0	-1.01	0	15.6	0	0
681	3	1	1	10	2	10	2	1	2	1	2	1		1	35	30	1	2	0	1	0	1	1	1	0	0	0	1	1	0	0	0	-1.71619	18	1	2	0	24.8	132.9	-1.56	0	-0.9		0	-1.55	0	11.8	0	0
682	3	1	1	10	1	11	2	1	3	1	2	1		2	35	32	1	2	1	0	0	0	1	1	0	1	1	1	0	1	1	1	1.44231	861	3	2	0	23	122.3			-3.09	2	1	-0.95	0
683	3	1	1	5	2	12	2	1	1	3	2	1		2	50	45	1	1	0	0	0	0	1	1	0	0	0	1	0	1	0	1	-0.463617	311	2	2	0	22.3	125.5			-3.76	2	1	-2.17	1	12.2	0	0
684	3	1	1	6	1	11	2	1	3	3	1	1		1	40	30	1	1	1	0	0	1	1	0	0	0	0	1	0	0	0	0	-1.44927	88	1	1	0	19.7	113			-4.47	2	1	-0.92	0
685	3	2	1	7	1	11	2	1	1	3	2	1		1	45	35	1	1	1	1	0	1	1	1	1	1	0	0	1	0	0	1	-0.679224	281	1	1	0	38.4	149			0.87		0	0.19	0	13.5	0	0
686	3	2	1	4	1	8	1	1	3	3	2	2	1	1	35	28	1	1	1	1	0	0	1	1	0	1	1	0	0	0	0	1	0.842337	637	3	2	0	23.1	126.8	-0.68	0	-0.08		0	-1.02	0	10.3	1	0
687	3	2	1	7	1	8	1	1	3	3	2	2	1	1	40	35	1	1	0	0	0	0	1	1	1	1	0	0	0	1	0	1	-0.0919295	328	2	2	0	27.1	129.5	0.44	0	0.4		0	0.27	0	14.2	0	0
688	3	2	2	5	1	10	2	1	2	3	2	1		1		35	1		1	1	0	0	1	1	0	0	0	0	0	0	0	1	-0.658164	282	1	2	0	28.4	129.4	-0.59	0	-1.31		0	0.29	0	12.1	0	0
689	3	2	1	5	1	11	2	1	2	3	2	1		1	45	35	1	1	1	1	0	0	1	1	0	1	1	1	0	1	0	1	1.03518	780	3	2	0	28	129.3			-2.05	1	1	-0.1	0	12.9	0	0
690	3	2	1	8	2	9	1	1	2	3	2	1		1	30	25	1	2	1	1	1	1	1	1	0	1	1	1	1	1	1	1	0.807727	615	3	2	0	22.8	125.6	-1.35	0	-1.13		0	-0.99	0	13.8	0	0
691	3	2	1	6	1	10	2	1	2	3	2	1		1	32	28	1	1	1	1	0	1	1	1	0	0	0	0	0	1	0	0	-1.47894	79	1	2	1	27.1	130.6	-0.9	0	-1.13		0	-0.33	0	14.2	0	0
692	3	2	1	7	1	10	2	1	3	3	1	2	1	1	40	35	1	1	0	0	0	0	1	1	0	0	0	1	0	0	0	1	-0.57129	296	2	1	1	28.4	131.4	-0.59	0	-1		0	0	0	11.3	1	0
693	3	2	1	6	1	7	1	1	1	3	2	1		1	38	32	1	2	1	1	1	1	1	1	0	1	1	1	1	1	1	1	0.807727	615	3	2	0	18.2	119	-1.75	0	-0.52		0	-2.31	1	11.8	0	0
694	3	2	1	7	1	10	2	1	3	3	2	1		2	38	30	1	1	1	1	0	0	1	1	0	0	0	0	0	1	0	1	-0.550491	302	2	2	0	32	137	0.16	0	-0.12		0	0.33	0	16	0	0
695	3	2	1	6	2	10	2	2	2	3	2	1		1	35	30	1	2	1	0	0	0	1	1	1	0	0	0	0	1	0	0	-1.4488	93	1	2	0	21.4	111.4	-2.6	1	-4.26	2	1	0.29	0	12.7	0	0
696	3	2	1	8	1	12	2	1	2	3	1	1		1	40	35	1	1	1	0	0	0	1	1	0	0	0	1	0	0	0	0	-1.17394	238	1	2	0	19	116.9			-4.54	2	1	-2.49	1	12.5	0	0
697	3	2	1	6	1	10	2	1	1	3	2	1		1	35	32	1	2	1	1	1	1	1	1	1	1	1	1	1	0	1	1	0.402692	423	2	1	0	24.8	133.5	-1.51	0	-0.67		0	-1.83	0	11.4	1	0
698	3	2	1	8	1	10	2	1	1	3	2	2	3	2	45	30	1	2	1	1	0	0	1	1	0	1	1	0	1	1	1	1	1.1407	806	3	2	0	22.7	121.8	-2.17	1	-2.51	1	1	-0.73	0	12.5	0	0
699	3	2	1	10	2	8	1	1	1	3	2	1		1	30	27	1	2	1	1	0	0	1	1	1	1	1	1	1	1	0	1	0.554388	488	2	2	0	21.3	125.1	-1.04	0	-0.25		0	-1.39	0	10.5	1	0
700	3	2	1	7	2	10	2	1	2	3	2	1		2	41	30	1	2	1	1	0	0	1	1	0	0	0	0	0	0	0	0	-1.29213	108	1	2	0	26	132.1	-1.25	0	-1.02		0	-0.96	0	12.5	0	0
701	3	2	1	6	1	10	2	1	2	3	2	1		1	25	23	1	2	1	1	0	0	1	1	0	0	0	0	0	1	0	0	-1.18446	233	1	2	0	20.1	121.1	-3.11	2	-2.62	1	1	-2.03	1	13.7	0	0
702	3	2	1	6	2	8	1	1	1	3	2	1		2	35	30	1	1	0	0	0	0	1	1	0	0	0	0	1	0	0	0	-1.47385	81	1	2	1	30.6	143	1.17	0	2.84		0	-0.43	0	13.8	0	0
703	3	2	1	8	2	12	2	1	2	3	2	1		1	35	30	1	1	1	1	0	0	1	1	0	1	1	1	0	0	0	1	0.927504	671	3	2	0	35.4	139.7			-1.69		0	0.06	0	13.2	0	0
704	3	2	1	8	2	13	2	1	2	3	2	1		1	38	35	1	2	0	1	0	0	1	1	0	0	0	1	0	0	1	0	-0.864161	274	1	2	0	44.8	154.5			-0.27		0	-0.01	0	14.1	0	0
705	3	2	1	7	1	9	1	1	2	3	2	1		1	35	30	1	1	0	0	0	0	1	1	0	0	0	1	0	0	0	0	-1.20525	153	1	2	0	19.8	115.6	-2.58	1	-2.82	1	1	-0.85	0	13.4	0	0
706	3	2	1	6	1	9	1	1	1	3	2	1		1	29	22	1	2	1	1	0	1	1	1	1	1	1	1	1	1	0	1	0.2599	377	2	2	0	22.5	121.9	-1.57	0	-1.77		0	-0.61	0	13.1	0	0
707	3	2	1	4	1	10	2	1	2	3	2	1		1	35	30	1	2	1	1	1	1	1	1	1	1	1	1	1	1	1	1	0.510365	467	2	2	0	19.8	111.3	-3.22	2	-4.15	2	1	-0.28	0	14.2	0	0
708	3	2	1	5	2	9	1	1	2	3	2	1		1	30	28	1	1	1	0	0	0	1	0	1	1	1	0	0	0	0	1	0.597157	498	2	2	1	25	130	-0.75	0	-0.41		0	-0.76	0	10.5	1	0
709	3	2	1	6	2	8	1	1	2	3	2	1		1	45	35	1	1	0	1	0	0	1	1	0	1	1	0	0	0	0	1	0.811025	617	3	2	0	21.4	123.4	-1.01	0	-0.54		0	-1.05	0	13.5	0	0
710	3	2	1	6	1	13	2	1	1	3	2	1		1	50	40	1	1	1	1	1	1	1	1	0	1	1	1	0	1	1	1	0.991153	745	3	2	0	38.7	151.3			-0.64		0	-0.68	0	13	0	0
711	3	2	1	8	2	8	1	1	2	2	2	1		2	55	40	1	1	1	1	0	1	1	1	0	1	0	1	0	1	1	1	0.368517	413	2	2	0	23.1	128.5	-0.51	0	0.34		0	-1.1	0	13.6	0	0
712	3	2	2	4	2	8	1	2	2	2	2	1		1	35	30	1	2	1	1	0	0	1	1	0	1	1	0	0	0	0	1	0.842337	637	3	2	0	26.8	127.5	0.42	0	0.16		0	0.43	0	12	0	0
713	3	2	1	10	2	10	2	1	2	2	2	2	1	1	40	35	1	2	0	0	0	0	1	1	0	0	0	0	0	0	0	1	-0.656457	283	1	1	0	33.1	140.1	0.22	0	0.23		0	0.12	0	13.5	0	0
714	3	2	1	6	2	11	2	1	1	3	2	2	1	1	35	28	1	1	0	0	0	0	1	0	0	0	0	1	0	0	0	0	-1.18609	180	1	1	0	27	130			-2.26	1	1	-0.63	0	13.5	0	0
715	3	2	1	5	2	14	2	1	2	3	2	1		1	35	25	1	2	1	0	0	1	1	1	1	0	0	0	1	1	0	0	-1.92671	5	1	2	1	31	143.2			-2.39	1	1	-2.21	1	14.5	0	0
716	3	2	1	6	1	9	1	1	2	3	2	1		1	36	32	1	1	0	0	0	0	1	0	0	0	0	0	0	1	0	0	-1.16359	244	1	2	0	23.2	129	-1.34	0	-0.59		0	-1.58	0	12.5	0	0
717	3	2	1	9	2	12	2	1	2	3	2	1		1	40	35	1	2	1	1	1	0	1	1	1	1	1	1	1	1	1	1	0.804853	614	3	2	0	26.8	138			-1.93		0	-2.24	1	12.8	0	0
718	3	2	1	4	2	9	1	1	2	3	2	1		2	45	35	1	1	1	1	1	1	1	1	1	1	1	1	1	0	1	0	-0.231273	320	2	2	0	25.8	133.3	-0.55	0	0.13		0	-0.94	0	13.3	0	0
719	3	2	1	6	1	12	2	1	2	3	2	2	1	1	46	32	1	1	0	0	0	0	1	1	0	0	0	0	0	0	0	0	-1.29042	110	1	2	1	49	157			1.12		0	0.98	0	12.8	0	0
720	3	2	1	6	1	12	2	1	2	3	1	1		2	40	35	1	1	1	1	0	0	0	1	0	0	0	0	0	0	0	0	-1.29992	107	1	2	1	35.8	145.7			-0.48		0	-0.35	0	13.9	0	0
721	3	3	1	8	1	10	2	1	2	3	2	1		2	38	32	1	2	1	1	0	1	1	1	0	1	1	1	0	0	0	1	0.633016	513	2	2	0	24	127.8	-1.75	0	-1.57		0	-1.18	0	12.5	0	0
722	3	3	1	5	1	12	2	1	2	3	2	1		1	55	50	1	1	1	1	0	0	1	1	0	1	1	1	0	1	0	1	1.03518	780	3	2	0	24	127			-3.12	2	1	-1.65	0	10.6	1	1
723	3	3	1	6	1	13	2	1	2	3	2	1		1	45	40	1	1	1	1	0	1	1	1	0	0	1	1	0	0	1	1	0.252912	375	2	2	0	32.1	142			-1.89		0	-1.28	0	13.8	0	0
724	3	3	1	8	2	10	2	1	2	3	2	1		1	40	35	2	1	1	1	0	1	1	1	0	0	0	1	0	0	0	0	-1.50145	51	1	2	0	24	127.4	-1.79	0	-1.76		0	-1.03	0	12.5	0	0
725	3	3	1	6	1	12	2	1	1	3	2	2	3	2	80	35	1	1	1	0	0	0	1	0	0	0	0	0	0	0	0	0	-1.23995	129	1	2	1	38	151.4			0.33		0	-0.51	0	11.7	1	0
726	3	3	1	9	2	10	2	1	2	3	2	1		1	50	48	1	1	1	1	1	1	1	1	1	1	1	1	1	1	1	1	0.510365	467	2	2	0	24	127.4	-1.79	0	-1.76		0	-1.03	0	12.5	0	0
727	3	3	2	4	2	9	1	1	1	3	2	1		2	72	50	1	1	1	1	1	1	1	1	0	0	0	1	0	1	1	1	-0.509348	308	2	1	0	30.9	133.9	0.53	0	0.23		0	0.55	0	12.1	0	0
728	3	3	1	11	2	12	2	1	2	2	2	2	1	1	45	35	1	2	0	0	0	0	1	1	0	0	0	0	0	0	0	0	-1.29042	110	1	2	0	47.9	159.3			1.18		0	0.35	0	11.5	1	0
729	3	3	1	9	1	10	2	1	2	3	2	1		1	45	30	1	1	1	0	0	0	1	1	0	0	0	0	0	1	0	1	-0.517472	307	2	2	0	30.1	136.9	-0.21	0	-0.14		0	-0.23	0	15.6	0	0
730	3	3	1	7	2	12	2	1	1	3	2	1		1	35	30	1	1	1	1	0	0	1	1	0	1	0	0	0	1	0	1	0.203725	372	2	2	0	32.5	142.8			-1.23		0	-1.01	0	12.5	0	0
731	3	3	1	7	2	12	2	1	2	3	2	1		1	40	35	1	2	1	1	1	1	1	1	1	1	1	1	1	0	0	1	0.0285789	347	2	2	0	23.4	131			-2.96	1	1	-2.58	1	11.9	1	1
732	3	3	1	7	2	13	2	1	2	3	2	1		1	45	35	1	1	0	0	0	0	1	1	0	0	0	0	0	0	0	1	-0.656457	283	1	2	0	24	127.4			-4.17	2	1	-2.1	1	12.5	0	0
733	3	3	1	7	2	10	2	1	1	3	2	2	1	1	45	35	1	2	1	1	0	0	1	1	0	1	1	1	0	1	1	1	1.40929	860	3	2	0	41.8	150.7	1.45	0	1.89		0	0.77	0	14.3	0	0
734	3	3	1	6	2	9	1	1	2	3	2	1		1	29	27	1	2	1	1	0	1	1	0	0	0	0	1	1	1	0	1	-0.924076	270	1	1	0	26	134.5	-0.5	0	0.33		0	-1.04	0	13.6	0	0
735	3	3	2	7	1	10	2	1	2	2	2	1		2		35	1		1	0	0	0	1	0	0	0	0	0	0	1	0	0	-1.13227	260	1	2	1	35.7	146	0.8	0	1.29		0	0.17	0	14.7	0	0
736	3	3	1	6	1	11	2	1	2	3	2	1		2	40	35	1	1	1	0	0	1	0	1	0	1	0	1	0	1	0	1	0.0196321	342	2	2	0	27.4	138			-0.76		0	-1.71	0	12.1	0	0
737	3	3	1	6	2	12	2	1	2	3	2	1		2	45	35	1	1	1	1	0	0	1	1	0	1	1	1	1	1	1	1	1.22586	814	3	2	1	40.8	149.8			-0.21		0	0.08	0	13.1	0	0
738	3	3	1	8	1	12	2	1	2	3	2	1		2	45	40	1	1	0	0	0	0	1	1	0	0	0	0	0	0	0	0	-1.29042	110	1	2	0	24	127.4			-3.06	2	1	-1.73	0	12.5	0	0
739	3	3	1	10	1	12	2	1	1	3	2	1		1	45	35	1	1	0	0	0	1	1	1	0	0	0	1	0	1	0	0	-1.39207	94	1	2	0	36.4	142.9			-0.87		0	0.14	0	13.7	0	0
740	3	3	1	7	2	10	2	1	2	3	2	1		1	45	35	1	1	1	0	0	0	1	1	0	1	1	1	0	1	0	1	1.0682	793	3	2	0	33.8	143.5	0.34	0	0.76		0	-0.1	0	13.4	0	0
741	3	3	1	10	2	10	2	1	2	2	2	1		1	40	33	1	1	0	0	0	0	1	1	0	1	1	1	0	1	0	1	1.03688	784	3	2	0	24.8	130	-1.56	0	-1.35		0	-1.11	0
742	3	3	1	8	2	10	2	1	2	2	2	1		1	40	35	1	1	1	0	0	0	1	1	0	1	1	0	0	0	0	1	0.875356	654	3	1	0	21.8	122.2	-2.47	1	-2.57	1	1	-1.16	0	13.7	0	0
743	3	3	1	10	1	11	2	1	2	3	2	1		1	50	45	1	1	1	0	0	1	1	1	0	1	1	1	0	0	0	1	0.666035	551	2	2	0	24.1	127.4			-2.33	1	1	-1.34	0	12.5	0	0
744	3	3	1	7	1	10	2	1	1	3	2	1		1	40	35	1	2	1	1	1	1	1	1	1	1	1	1	1	0	1	1	0.402692	423	2	2	0	24	131.4	-1.75	0	-1		0	-1.85	0	9.9	1	0
745	3	3	1	6	1	11	2	1	1	3	2	1		1	56	44	1	2	0	1	1	0	1	1	1	1	1	1	1	1	1	1	0.773541	604	3	2	0	34	145.6			0.37		0	-0.52	0	14.4	0	0
746	3	3	1	7	1	9	1	1	1	3	2	1		1	35	28	1	2	1	1	0	0	1	1	1	1	1	1	1	1	1	1	0.928501	682	3	2	0	23.8	122.6	-1.15	0	-1.66		0	-0.14	0	13	0	0
747	3	3	1	5	1	12	2	1	2	3	2	1		1	40	35	1	2	0	0	0	0	1	1	0	0	0	0	0	1	0	0	-1.18275	236	1	2	0	24	127.4			-3.06	2	1	-1.73	0	12.5	0	0
748	3	3	2	9	2	12	2	1	1	3	2	1		1	40	30	1	2	1	1	0	1	1	1	1	1	0	0	1	1	0	1	-0.571551	295	2	1	0	29.4	141.2			-1.47		0	-1.75	0	14.4	0	0
749	3	3	2	9	1	9	1	1	2	3	2	1		1	99	50	1	1	0	0	0	0	1	1	0	0	0	1	0	0	0	0	-1.20525	153	1	2	0	26	129.7	-0.52	0	-0.48		0	-0.39	0	14.4	0	0
750	3	3	1	7	1	12	2	1	2	3	2	1		1	40	35	1	2	0	1	0	1	1	1	1	1	1	1	0	0	0	1	0.304341	386	2	2	0	24	127.4			-3.06	2	1	-1.73	0	12.5	0	0
751	3	3	1	6	1	12	2	1	2	3	2	1		2	45	33	1	2	0	0	0	0	1	0	0	0	0	1	0	0	0	1	-0.552127	298	2	2	0	25	127			-3.12	2	1	-1.2	0	12.5	0	0
752	3	3	1	8	1	10	2	1	2	3	2	1		2	40	35	1	1	1	1	0	1	1	1	0	1	0	1	0	0	1	0	-0.373121	314	2	2	0	24	127.4	-1.75	0	-1.63		0	-1.1	0	12.5	0	0
753	3	3	1	5	2	10	2	1	2	3	2	1		2	45	35	1	1	0	1	0	0	1	1	0	1	1	1	0	1	1	1	1.37798	858	3	2	0	24	127.4	-1.79	0	-1.76		0	-1.03	0	12.5	0	0
754	3	3	1	5	2	10	2	1	2	3	2	1		1	50	40	1	1	1	0	0	0	0	1	0	1	1	1	1	1	0	1	0.876979	657	3	2	1	24	127.4	-1.79	0	-1.76		0	-1.03	0	12.5	0	0
755	3	3	1	7	2	10	2	1	2	2	2	1		1	40	35	1	2	1	1	0	1	1	1	1	0	0	0	1	1	0	0	-1.95973	3	1	2	1	24	130.1	-1.79	0	-1.33		0	-1.45	0	14.5	0	0
756	3	3	2	3	1	10	2	1	2	2	2	2	1	2		35	1		0	0	0	0	1	0	0	0	0	0	0	0	0	0	-1.27126	115	1	2	1	28.4	131.3	-0.59	0	-1.02		0	0.02	0	13.7	0	0
757	3	4	1	7	1	11	2	2	2	3	2	1		2	30	25	1	2	1	0	1	0	1	1	0	1	1	1	0	0	0	1	0.836875	635	3	2	0	27.4	133.5			-1.43		0	-0.96	0	14.5	0	0
758	3	4	1	8	1	11	2	1	2	2	2	1		2	42	38	1	2	1	0	0	0	1	1	0	1	1	1	0	0	0	1	0.960523	713	3	2	0	28.1	130.5			-1.87		0	-0.24	0	11.8	0	0
759	3	4	1	6	1	14	2	1	2	2	2	1		1	50	40	1	1	1	1	1	1	1	1	0	1	1	1	0	1	1	1	0.991153	745	3	2	0	50.8	162.2			-0.13		0	0.13	0	15.3	0	0
761	3	4	1	8	1	11	2	1	2	2	2	1		2	38	28	1	2	1	1	0	0	1	1	0	0	0	1	0	1	0	0	-1.09929	262	1	2	0	29.1	130.5			-1.87		0	0.08	0	12.5	0	0
762	3	4	1	7	1	14	2	1	2	3	2	1		2	35	30	1	2	1	0	0	0	1	1	0	1	1	1	1	0	0	1	0.777097	606	3	2	0	37.3	148			-1.97		0	-0.99	0	15.5	0	0
763	3	4	2	4	1	11	2	1	2	2	2	1		2	35	25	1	1	0	1	0	1	1	1	0	1	0	1	0	0	0	1	-0.144581	326	2	2	0	22.4	133.2			-1.47		0	-3.42	1	17.5	0	0
764	3	4	1	10	1	12	2	1	2	2	2	1		2	45	40	1	1	1	0	0	0	1	1	0	0	0	0	0	0	0	0	-1.25911	127	1	2	0	37.4	148.5			-0.08		0	-0.3	0	14.4	0	0
765	3	4	1	6	1	11	2	1	2	2	2	1		2	35	32	1	1	0	0	0	0	1	1	0	0	1	1	1	0	0	1	-0.00843151	339	2	2	0	25	133.6			-1.41		0	-2.04	1	13.8	0	0
766	3	4	1	7	1	11	2	1	2	2	2	1		2	35	30	1	1	0	0	0	0	1	1	0	0	0	1	1	0	0	1	-0.754716	280	1	2	0	26.8	129.4			-2.04	1	1	-0.54	0	12.6	0	0
767	3	4	1	10	1	11	2	1	2	2	2	1		2	42	40	1	1	0	0	0	0	1	1	0	0	0	1	0	0	0	0	-1.20525	153	1	2	0	38.2	151.5			1.25		0	-0.16	0	13.1	0	0
768	3	4	1	10	1	11	2	1	2	2	2	1		2	40	35	2	2	1	1	1	1	1	1	0	1	1	1	1	0	0	1	0.325941	398	2	2	0	33	135			-1.21		0	0.57	0	13.8	0	0
769	3	4	1	9	1	11	2	2	2	2	2	1		2	32	30	1	1	1	0	0	0	1	1	0	1	1	1	0	0	0	1	0.960523	713	3	2	0	43.3	151.5			1.25		0	0.88	0	14.3	0	0
770	3	4	1	4	1	11	2	1	2	2	2	1		2	35	30	1	1	1	0	0	0	1	1	0	0	0	1	0	0	0	0	-1.17394	238	1	2	0	31	135			-1.21		0	0.04	0	13.8	0	0
771	3	4	1	9	1	11	2	2	2	2	2	1		2	42	38	1	2	0	1	0	1	1	1	0	1	1	1	0	0	1	1	0.975816	723	3	2	0	30.8	139.7			-0.51		0	-0.68	0	13.9	0	0
772	3	4	1	6	2	11	2	1	2	2	2	1		2	36	30	1	2	0	0	0	1	1	1	1	1	1	1	0	0	0	1	0.337361	403	2	2	0	29	128			-2.56	1	1	0.2	0	13.8	0	0
773	3	4	1	7	1	11	2	1	2	3	2	1		2	35	31	1	1	1	0	0	0	1	1	0	1	1	1	0	0	0	1	0.960523	713	3	2	0	29.5	137.9			-0.77		0	-0.86	0	12.8	0	0
774	3	4	1	7	1	11	2	1	2	2	2	1		2	35	32	1	1	0	0	0	0	1	1	0	0	0	1	0	0	0	0	-1.20525	153	1	2	0	32	135			-1.21		0	0.31	0	13.8	0	0
775	3	4	1	6	2	11	2	1	2	3	2	1		2	40	38	1	2	1	1	0	0	1	1	0	1	1	0	1	0	0	1	0.658911	547	2	2	0	33.4	138.6			-0.96		0	0.06	0	11	1	0
776	3	4	1	6	1	12	2	1	2	3	2	1		2	50	45	1	1	1	0	0	0	1	1	0	1	1	1	0	0	0	1	0.960523	713	3	2	0	30.1	138			-1.56		0	-0.99	0	12.5	0	0
777	3	4	1	6	2	12	2	1	2	2	2	1		2	35	32	1	1	1	1	0	0	1	1	0	0	0	1	0	0	0	0	-1.20696	144	1	1	0	32	132			-2.81	1	1	0.15	0	13.8	0	0
778	3	4	1	6	1	12	2	1	2	3	2	1		2	32	28	1	1	1	0	1	1	1	1	0	1	1	1	1	0	0	1	0.35896	409	2	1	0	34.8	148			-0.15		0	-0.93	0	12.5	0	0
779	3	4	1	5	1	13	2	1	2	3	2	1		2	35	30	1	2	1	1	1	1	1	1	0	1	1	1	0	0	1	1	0.88348	658	3	2	0	45.2	155.4			-0.09		0	0.22	0	14.5	0	0
780	3	4	1	9	1	12	2	1	2	2	2	1		2	55	50	1	1	0	1	0	0	1	1	0	0	0	1	0	0	0	0	-1.23827	132	1	2	0	35.1	139			-1.42		0	0.3	0	10.5	1	0
781	3	4	1	5	1	11	2	1	2	2	2	1		2	45	30	1	2	1	0	0	0	1	1	0	0	0	1	0	0	0	0	-1.17394	238	1	2	0	41	144.7			0.24		0	1.15	0	13.2	0	0
782	3	4	1	7	1	12	2	1	2	3	2	1		2	48	35	1	2	1	0	0	1	1	1	1	1	1	1	1	1	1	1	0.667032	553	2	2	0	29	132.4			-2.35	1	1	-0.53	0	12.9	0	0
783	3	4	2	4	2	11	2	1	2	2	2	1		2	99	39	1	1	1	0	0	0	1	1	0	0	0	1	0	0	0	1	-0.539977	304	2	2	0	29	131			-2.11	1	1	-0.16	0	13.8	0	0
784	3	4	1	7	1	11	2	1	2	3	2	1		1	40	32	1	1	0	0	0	0	1	1	0	0	0	1	0	0	0	0	-1.20525	153	1	2	0	31.3	143.5			0.06		0	-1.08	0	12.8	0	0
785	3	4	1	5	1	12	2	1	2	2	2	1		2	35	28	1	1	1	1	0	0	1	1	0	0	0	1	0	0	0	0	-1.20696	144	1	2	0	35.7	146			-0.43		0	-0.41	0	12.8	0	0
786	3	4	1	5	2	13	2	1	2	3	2	1		2	28	25	1	1	0	0	0	0	1	1	0	1	1	1	0	0	0	1	0.929211	684	3	2	0	46.1	152.7			-0.53		0	0.36	0	15.5	0	0
787	3	4	2	7	2	14	2	1	1	3	2	1		2	50	45	1	2	1	1	0	1	1	1	1	1	1	1	1	1	1	1	0.634013	520	2	1	0	48	154.3			-0.79		0	0.22	0	14.5	0	0
788	3	4	2	5	1	11	2	1	2	2	2	1		2		30	1		1	0	0	0	1	1	0	0	0	1	0	0	0	0	-1.17394	238	1	2	0	44.5	153			1.47		0	0.94	0	15.7	0	0
789	3	4	1	10	1	14	2	1	2	2	2	1		2	45	35	1	2	1	0	0	1	1	1	0	1	1	1	1	0	1	1	0.856722	648	3	2	1	60.4	171.4			1.07		0	0.61	0	14	0	0
790	3	4	1	7	2	12	2	1	2	2	2	1		2	40	30	1	1	1	0	0	0	1	1	0	1	1	1	0	0	0	1	0.960523	713	3	2	0	28.1	130			-3.1	2	1	-0.64	0	13.2	0	0
791	3	4	1	9	1	11	2	1	2	3	2	1		2	48	32	1	1	1	1	0	1	1	1	0	1	1	1	0	0	0	1	0.633016	513	2	2	0	27.4	135.3			-1.16		0	-1.25	0	13.2	0	0
792	3	4	2	8	1	11	2	2	2	2	2	1		2	30	25	2	1	0	0	0	0	1	1	0	0	0	1	0	0	0	1	-0.57129	296	2	2	0	34.3	139			-0.61		0	0.41	0	12.9	0	0
793	3	5	1	3	1	13	2	1	2	2	1	1		2	35	30	1	1	1	1	0	0	1	1	0	0	0	1	0	0	0	0	-1.20696	144	1	2	0	36.3	145.5			-1.42		0	-0.54	0	12.5	0	0
794	3	5	1	7	2	14	2	1	2	3	2	1		2	35	28	1	2	1	0	0	1	1	1	0	0	0	1	1	0	1	1	-0.643779	285	1	2	0	46	148.3			-1.65		0	0.47	0	12.3	0	0
795	3	5	1	7	1	13	2	1	2	2	2	1		2	44	38	1	2	1	1	0	1	1	1	0	0	0	1	0	0	0	1	-0.867485	273	1	2	0	28.4	137			-2.56	1	1	-1.85	0	14.8	0	0
796	3	5	1	6	2	13	2	1	2	1	2	1		2	50	35	1	1	1	0	0	0	1	1	0	1	1	0	1	1	0	1	0.799603	612	3	2	0	35.5	142.9			-1.94		0	-0.61	0	13.4	0	0
797	3	5	1	8	1	12	2	1	2	2	2	1		2	38	35	1	2	1	1	0	0	1	1	0	0	0	1	0	0	0	1	-0.572997	292	2	2	0	39.8	145.4			-0.52		0	0.58	0	12.4	0	0
798	3	5	1	7	2	13	2	1	2	2	2	1		2	45	40	1	2	1	0	1	1	1	1	0	1	1	1	1	1	1	1	0.840746	636	3	2	0	39.5	149.6			-0.98		0	-0.49	0	15.6	0	0
799	3	5	1	5	2	13	2	1	2	2	2	1		2	38	30	1	2	1	0	0	1	1	1	0	0	0	1	0	0	0	0	-1.46843	83	1	2	0	39	145.5			-1.57		0	-0.15	0	11.5	1	0
800	3	5	1	5	2	14	2	1	2	2	2	1		2	32	28	1	1	1	1	0	0	1	1	0	1	1	1	0	0	0	1	0.927504	671	3	1	0	36.8	140.3			-2.81	1	1	-0.34	0	14.9	0	0
801	3	5	1	8	1	13	2	1	2	2	2	1		2	35	30	1	2	1	1	0	0	1	1	0	1	1	1	0	0	1	1	1.30162	818	3	2	0	41	156.4			0.05		0	-0.76	0	13.9	0	0
802	3	5	2	8	1	13	2	1	2	2	2	1		2		40	2		1	0	0	1	1	1	0	1	1	1	1	0	0	1	0.482609	460	2	2	0	36	145.9			-1.37		0	-0.67	0	15.4	0	0
803	3	5	1	6	1	13	2	1	2	2	2	1		2	43	40	1	1	1	0	1	1	1	1	1	1	1	1	1	0	1	1	0.435711	439	2	2	0	34.3	144.6			-1.54		0	-0.97	0	11.3	1	0
804	3	5	1	7	1	13	2	1	2	3	1	1		2	45	30	1	1	0	1	0	1	1	1	1	1	1	1	0	0	1	1	0.678454	558	2	2	0	44.3	163			0.94		0	-0.81	0	15.7	0	0
805	3	5	1	7	2	13	2	1	2	3	2	1		2	38	36	1	2	1	0	0	0	1	1	0	1	1	1	0	0	0	1	0.960523	713	3	2	0	35.1	140			-2.36	1	1	-0.37	0	12.5	0	0
806	3	5	1	4	2	13	2	1	2	2	2	1		2	50	25	1	1	1	0	0	1	1	1	0	1	1	1	0	0	1	1	1.04015	786	3	2	0	29	140.1			-2.34	1	1	-2.11	1
807	3	5	1	7	2	13	2	1	1	3	2	1		2	40	30	1	2	1	0	0	0	1	1	1	1	1	1	1	0	1	1	0.853848	644	3	2	0	35.2	152.7			-0.53		0	-1.89	0	11.5	1	0
808	3	5	1	8	1	13	2	1	2	1	2	1		2	30	28	2	1	1	1	0	0	1	1	0	1	1	1	0	0	1	1	1.30162	818	3	2	0	28.2	133			-3.1	2	1	-1.27	0	13.5	0	0
809	3	5	1	9	2	13	2	2	2	3	1	1		2	34	30	1	2	0	0	0	0	1	1	0	1	1	1	0	0	0	1	0.929211	684	3	1	0	43	151.2			-0.75		0	0	0	11.5	1	0
810	3	5	1	3	1	14	2	1	2	2	2	1		2	35	99	1	1	1	1	0	0	1	1	0	0	0	1	0	0	0	1	-0.572997	292	2	2	0	47.8	163			-0.02		0	-0.47	0	15.8	0	0
811	3	5	1	7	1	13	2	1	2	2	2	1		2	38	24	1	2	1	1	0	1	1	1	0	1	1	1	0	0	0	1	0.633016	513	2	2	0	34.2	142.3			-1.85		0	-0.69	0	11.1	1	0
812	3	5	1	10	2	13	2	2	1	3	2	1		2	35	30	1	1	1	1	0	0	1	1	0	1	1	1	0	0	0	1	0.927504	671	3	2	0	36.5	148.5			-1.13		0	-1.03	0	11.9	1	0
814	3	5	1	9	1	13	2	1	2	3	2	1		2	39	30	1	2	1	1	1	1	1	1	0	1	1	1	0	0	0	1	0.509367	465	2	2	0	26.3	132.7			-3.14	2	1	-2	0	10.6	1	1
815	3	5	1	6	1	13	2	1	2	2	2	1		2	30	28	1	1	1	0	0	0	1	1	0	0	0	1	0	1	0	0	-1.06627	267	1	1	0	27	130.8			-3.4	2	1	-1.38	0	16.2	0	0
816	3	5	1	8	1	13	2	1	1	2	2	1		2	40	34	1	2	0	0	0	0	1	1	0	1	0	1	1	0	1	1	0.373614	416	2	2	0	31.2	139.3			-2.25	1	1	-1.18	0	12.9	0	0
817	3	5	1	7	1	13	2	1	1	2	2	1		2	32	27	1	2	1	1	1	1	1	0	0	1	1	1	0	1	1	1	1.01032	765	3	2	0	30	144			-1.62		0	-2.39	1	13.2	0	0
818	3	5	1	7	1	14	2	1	2	2	2	1		2	29	22	1	1	1	0	0	1	0	1	0	0	0	1	0	0	0	0	-1.47622	80	1	2	0	34.9	140.6			-2.94	1	1	-0.64	0	13.7	0	0
819	3	5	1	9	2	13	2	1	2	3	2	1		2	40	37	1	1	1	1	0	1	1	1	0	1	1	1	0	0	1	0	0.373163	415	2	1	0	42	151.5			-0.7		0	-0.21	0	13.3	0	0
820	3	5	2	5	1	13	2	1	2	3	2	1		2		40	1		0	0	0	1	1	1	0	0	0	1	0	1	0	0	-1.39207	94	1	1	0	35	145.5			-1.42		0	-0.9	0	13.1	0	0
821	3	5	1	7	1	13	2	2	3	2	2	1		2	40	30	1	1	1	0	0	1	1	1	0	1	1	1	1	0	0	1	0.482609	460	2	2	0	36	144.1			-1.61		0	-0.44	0	14.5	0	0
822	3	5	1	7	1	14	2	1	2	2	2	1		2	30	28	1	1	1	1	0	1	1	1	0	0	0	1	0	0	0	0	-1.50145	51	1	1	0	30.5	135			-3.66	2	1	-1.16	0	12.6	0	0
823	3	5	1	7	1	13	2	1	2	3	2	1		2	45	40	1	1	1	0	1	1	1	1	1	1	1	1	0	1	1	1	0.72681	573	2	1	0	34.2	144.4			-1.57		0	-0.98	0	13.3	0	0
824	3	5	1	9	2	13	2	1	2	2	2	1		2	40	28	1	1	1	1	0	1	1	1	0	1	1	1	0	0	1	1	1.00713	753	3	1	0	41.7	154			-0.34		0	-0.52	0	12.8	0	0
825	3	5	1	7	1	13	2	1	2	2	2	1		2	32	25	2	2	1	0	0	1	1	1	1	1	1	1	1	0	1	1	0.559359	490	2	2	0	30	141.7			-1.93		0	-2	0	13.1	0	0
826	3	5	1	5	1	13	2	1	2	3	2	1		2	38	35	1	1	1	1	0	1	1	1	0	1	1	1	1	0	1	1	0.823702	628	3	1	0	28	133.9			-2.98	1	1	-1.49	0	12.1	0	0
827	3	5	1	11	1	13	2	1	2	2	2	1		2	35	29	1	1	1	0	0	0	1	1	0	0	0	1	0	0	1	1	-0.165865	323	2	2	0	45	159.7			0.49		0	-0.28	0	12.7	0	0
828	3	5	1	7	1	13	2	1	2	3	2	1		2	35	30	1	1	1	1	0	1	1	1	1	1	1	1	0	1	1	1	0.817439	618	3	2	0	44.3	163			0.94		0	-0.81	0	15.7	0	0
829	3	6	1	7	2	13	2	1	1	3	2	1		2	45	35	1	1	1	1	0	0	1	1	1	1	1	1	0	1	1	1	1.11193	801	3	2	0	38.4	152.8			-0.51		0	-1.09	0	13.8	0	0
830	3	6	1	7	1	14	2	1	2	2	1	1		1	38	32	1	1	0	0	0	0	1	1	0	0	0	1	0	1	0	0	-1.09758	263	1	1	0	41	157.7			-0.71		0	-1.31	0	14.8	0	0
831	3	6	2	5	1	13	2	1	2	3	2	1		2	40	20	1		0	0	0	1	1	1	0	0	0	1	0	1	0	0	-1.39207	94	1	1	0	39	155.1			-0.13		0	-1.09	0	15.6	0	0
832	3	6	2	6	1	13	2	1	1	3	2	1		2		45	1		1	1	0	1	1	1	1	1	1	1	1	0	0	1	0.152227	355	2	2	0	38.4	152.8			-0.44		0	-0.95	0	13.8	0	0
833	3	6	1	8	1	14	2	2	2	3	2	1		2	40	35	1	1	1	0	0	0	0	1	0	1	1	1	0	1	0	0	0.42644	436	2	2	0	45.1	155.6			-0.99		0	-0.17	0	15.4	0	0
834	3	6	1	7	2	14	2	1	1	3	2	1		2	50	45	1	2	1	1	0	1	1	1	0	1	1	1	1	0	1	1	0.823702	628	3	2	0	38.4	152.8			-1.01		0	-1.41	0	13.8	0	0
835	3	6	2	4	2	14	2	1	1	3	2	1		2		40	1		1	1	0	0	1	1	0	1	1	1	0	0	1	1	1.30162	818	3	1	0	38.4	152.8			-1.01		0	-1.41	0	13.8	0	0
836	3	6	2	7	2	14	2	1	1	3	2	1		2	42	38	1	2	1	1	1	1	1	1	1	1	1	1	1	0	1	1	0.402692	423	2	2	0	38.4	152.8			-1.01		0	-1.41	0	13.8	0	0
837	3	6	1	6	2	14	2	1	2	2	2	1		1	40	35	1	2	1	1	0	0	1	0	0	0	0	1	0	0	0	0	-1.1878	172	1	2	0	35.8	145.4			-2.07	1	1	-1.15	0	13.2	0	0
838	3	6	1	5	2	14	2	1	1	3	2	1		2	57	50	1	1	1	1	0	1	1	1	0	1	1	1	0	0	0	1	0.633016	513	2	2	0	38.4	152.8			-1.01		0	-1.41	0	13.8	0	0
839	3	6	1	8	1	14	2	1	2	3	2	1		2	36	30	1	2	1	0	0	1	1	1	0	1	1	1	0	0	0	1	0.666035	551	2	2	0	31.7	144.7			-2.4	1	1	-2.26	1	13.2	0	0
840	3	6	1	6	1	14	2	1	2	3	2	1		2	28	25	1	1	1	1	0	0	1	1	0	0	0	1	0	0	0	0	-1.20696	144	1	2	0	42	156.6			-0.86		0	-0.93	0	14.7	0	0
841	3	6	1	8	1	13	2	1	2	2	2	1		2	30	25	1	2	1	1	0	1	1	1	0	1	1	1	0	0	0	1	0.633016	513	2	2	0	25.7	135.3			-2.79	1	1	-2.77	1	14.9	0	0
842	3	6	1	12	1	14	2	1	2	3	2	1		2	50	45	1	2	0	0	0	1	1	1	0	0	0	1	0	0	0	0	-1.49974	55	1	2	0	31	130			-4.31	2	1	-0.3	0	11	1	1
843	3	6	1	4	1	14	2	1	1	3	2	1		2	45	30	1	1	1	1	0	0	1	1	0	0	0	1	0	0	0	0	-1.20696	144	1	2	0	38.4	152.8			-1.35		0	-1.34	0	13.8	0	0
844	3	6	1	7	1	14	2	1	1	1	2	1		2	38	32	1	2	1	1	0	0	1	0	0	1	1	1	0	0	0	1	0.946667	693	3	2	0	32.8	132.6			-3.98	2	1	-0.15	0	11.5	1	1
845	3	6	1	6	1	13	2	1	2	3	2	1		2	40	35	1	2	1	1	0	0	1	1	0	1	1	1	1	0	0	1	0.744078	586	3	2	0	35	135			-2.83	1	1	0.42	0	12	0	0
846	3	6	1	8	1	14	2	1	2	3	2	1		2	35	30	1	1	1	0	0	1	1	1	0	1	1	1	0	1	0	1	0.773708	605	3	2	0	31	145.6			-2.29	1	1	-2.68	1	14.8	0	0
847	3	6	1	12	1	14	2	1	2	2	2	1		2	50	45	1	2	0	0	0	1	1	1	0	1	1	1	0	0	1	1	1.00884	761	3	2	0	35	146			-2.23	1	1	-1.35	0	13.8	0	0
848	3	6	2	6	2	14	2	1	2	2	2	1		2	40	35	1	2	1	1	0	0	1	1	0	1	1	0	0	0	0	1	0.842337	637	3	2	0	33	130			-4.29	2	1	-0.01	0	9.5	1	1
849	3	6	1	8	2	14	2	1	1	3	2	1		2	45	40	1	1	0	1	0	1	1	1	0	1	1	1	0	0	1	1	0.975816	723	3	2	0	36	135			-3.57	2	1	0.07	0	11.5	1	1
850	3	6	1	7	1	14	2	1	3	2	2	1		2	30	28	1	2	1	1	0	0	1	1	0	0	0	1	0	0	0	0	-1.20696	144	1	2	0	38.8	153.4			-1.27		0	-1.31	0	12.7	0	0
851	3	6	1	7	1	13	2	1	2	2	2	1		2	35	30	1	1	1	1	0	1	1	1	0	1	1	1	0	0	0	1	0.633016	513	2	2	0	34.8	143.3			-1.72		0	-0.66	0	14.1	0	0
852	3	6	2	4	2	14	2	1	1	3	2	1		2		40	1		1	0	1	0	1	1	0	1	1	1	1	0	0	1	0.653449	543	2	2	0	38.4	152.8			-1.01		0	-1.41	0	13.8	0	0
853	3	6	1	7	2	14	2	1	2	2	2	1		2	45	40	1	2	1	1	0	1	0	1	0	0	0	1	0	0	0	0	-1.50924	44	1	2	0	34.1	140			-2.85	1	1	-0.92	0	12.5	0	0
854	3	6	1	8	1	14	2	1	1	3	2	1		2	48	41	1	2	1	1	1	1	0	1	1	1	1	1	1	0	1	1	0.3949	421	2	1	0	38.4	152.8			-1.35		0	-1.34	0	13.8	0	0
855	3	6	1	5	1	14	2	1	2	3	2	1		2	40	35	1	2	1	0	1	1	1	1	1	1	1	1	1	0	1	1	0.435711	439	2	2	0	49.6	167.6			0.57		0	-0.64	0	14.7	0	0
856	3	6	1	7	1	14	2	1	2	3	2	1		2	35	28	1	1	1	0	0	1	1	1	1	0	0	1	0	0	0	0	-1.76579	15	1	2	0	30.3	136.4			-3.48	2	1	-1.44	0	14.4	0	0
857	3	6	1	3	1	14	2	1	3	2	2	1		2	35	30	1	1	1	1	0	1	1	1	0	0	0	1	0	0	0	0	-1.50145	51	1	2	0	30	136			-3.53	2	1	-1.48	0	10.5	1	1
858	3	6	2	9	2	14	2	1	2	3	2	1		2		35	1		1	0	0	1	1	0	0	0	0	1	0	0	0	0	-1.44927	88	1	2	0	34	137			-3.28	2	1	-0.59	0	11.5	1	1
859	3	6	2	6	2	14	2	1	1	2	2	1		2		35	1		1	1	0	0	1	1	0	0	0	1	0	0	0	1	-0.572997	292	2	2	0	52	155.6			-0.6		0	0.64	0	12.8	0	0
860	3	6	1	9	1	14	2	1	2	2	2	2	1	2	45	35	1	1	0	0	0	0	1	1	0	0	0	1	0	0	0	0	-1.20525	153	1	2	0	26	135			-3.66	2	1	-3	1	11.6	1	1
861	3	6	1	7	1	14	2	1	3	2	2	1		2	48	40	1	2	0	1	0	1	1	1	0	1	1	1	0	0	0	1	0.601704	500	2	2	0	47.5	160.5			-0.35		0	-0.25	0	14.4	0	0
862	3	6	1	7	1	14	2	1	1	2	2	1		2	45	40	1	2	1	0	0	1	1	1	0	0	0	1	0	0	0	0	-1.46843	83	1	2	0	51.6	158.7			-0.58		0	0.58	0	14.8	0	0
863	3	6	1	6	1	13	2	1	2	2	2	1		2	32	29	1	2	1	1	0	0	1	1	0	1	1	1	0	0	0	1	0.927504	671	3	1	0	28.3	137.4			-2.51	1	1	-1.96	0	13.7	0	0
864	3	6	1	6	2	14	2	1	1	3	2	1		2	40	35	1	2	0	1	0	0	1	1	0	1	1	1	0	0	0	1	0.896192	663	3	2	0	38.4	152.8			-1.01		0	-1.41	0	13.8	0	0
[truncated: 37 more columns]
